# Supplementary material for: Gene variant effects across sodium channelopathies predict function and guide precision therapy
Source: PubMed Central journal article supplement — Brain. 2022 Jan 17;145(12):4275–86. doi: 10.1093/brain/awac006 (PMC9897196; doi:10.1093/brain/awac006), 2022-01-17
Supplement: awac006_Supplementary_Data.pdf [file awac006_Supplementary_Data.pdf]

# Supplementary Material

|                                                                                                                |    |
|----------------------------------------------------------------------------------------------------------------|----|
| Supplementary Methods.....                                                                                     | 2  |
| Supplementary Table 1: <i>SCN</i> Functionally Characterized Variants.....                                     | 5  |
| Supplementary Table 2: Corresponding variants, phenotypes, and function across different sodium channels ..... | 51 |
| Supplementary Table 3: Detailed <i>SCNI-11A</i> Analysis.....                                                  | 55 |
| Supplementary Figure 1: Study selection .....                                                                  | 58 |
| Supplementary Figure 2: Voltage sensing regions (S4) structure zoom across D1-D4.....                          | 59 |

# Supplementary Methods

## Functional classification of mutations:

For each mutation described we assessed the overall effect with respect to channel function in terms of net current flow during voltage steps. Channel function is not necessarily the same as overall effect on *cellular* function as elegantly shown recently in Liu et al., 2019,<sup>1</sup> where a gain in function for the channel, led to a paradoxical loss of function through depolarising block at the cellular level. As the vast majority of channels are characterised in non-excitabile mammalian cell lines in voltage clamp only, we have used this baseline to allow comparisons between published studies. Assessing the net effect where a mutation can have multiple effects on channels, we have looked at different parameters in the following approach:

1. Peak currents: we first checked whether a mutation reduced or increased the peak current substantially. Where data allow (e.g. for FHM3 mutations in Cestele et al., 2013)<sup>2</sup> we have also asked whether these effects on peak current are dependent on expression system in a way that means they may not be physiologically relevant in the endogenous cells. If there are data suggesting the effects on peak current are dependent on system, we have noted this as ‘mixed’ in the first instance.
2. Voltage dependence of inactivation: as the channels must be able to activate in order to pass current, we have asked whether there were shifts in the voltage dependence of inactivation that suggest a substantial portion of channels would be stuck in inactivated states in resting cells at ~-70 or -80 mV. In a very few cases we have suggested that were a large shift in voltage dependence of inactivation would effectively make channels non-functional, we have indicated this is likely an overall LoF effect, even if the peak current is increased and voltage dependence of activation (see #3) was also shifted (we gave inactivation precedence as the channels would be unable to open in resting cells if inactivated at resting potentials).
3. Voltage dependence of activation: given functional channels (i.e. peak current is not lost) that are not stuck in inactivated states at rest (i.e. voltage dependence of inactivation not shifted so all channels are inactive at -80 mV), we asked how much stimulation is required to open channels – that is to say, is the voltage dependence of activation shifted significantly? Here a shift to more

negative voltage dependences of activation would be a gain of function, but again – only if there are sufficient currents, and a significant population of non-inactivated channels.

4. Persistent currents: These can be increased, sometimes even when peak currents are reduced. Increases in persistent currents are included as gain of function, unless peak currents or voltage dependence of inactivation are shifted so much that channels are unlikely to be open at all, in which case, given the profound effects of sodium leaks on cellular activity we have still called cases with large increases in persistent currents ‘mixed’.

5. Gating pore currents: Few groups using neuronal channels have been able to interrogate whether in the cases of S4 arginines these include gating pore leak, we have not rigorously separated gating pore leaks (but see R853Q in SCN2A for one example where these currents have been seen in neuronal channels; Mason et al., 2019)<sup>3</sup>. Where gating pore leaks are described, these are a gain of function (and one that is highly likely to be pathogenic in any cell). Further technically challenging work on neuronal channels will be needed to confirm the conservation of these gating pore currents across channel subtypes.

6. There are many additional features that can come into play, and where the above 5 criteria do not give an overriding answer, we have looked at these. For example, many groups also look at recovery from inactivation, but in our survey, this was rarely changed enough to be the dominating feature of a channel’s functional change. However, where there were large impacts on recovery from inactivation and these were in contrast to other effects on the channel, we have given the results as mixed.

In practice this functional hierarchy, albeit simplistic and incomplete, typically agrees with the author assessments of the channels, with rare exceptions. We emphasise that this functional assessment is from the perspective of the channel, not the cell or the organism (indeed as these are mutations associated with diseases, they would all be loss of function from the organism’s perspective).

Additional studies, including dynamic clamp, expression in excitable cells and interrogating current clamp properties, modelling, and the golden standard of knock-in studies in mice, all will bring additional insights to the consequences of the mutations on the cells, networks and behaviours, but for the purposes of comparing the effects of mutations across different channels we have relied on the reductionist, most commonly used experimental approach. It remains to be

seen whether functional effects that alter, for example channel trafficking, are conserved in different types of sodium channels expressed in different cellular backgrounds. In addition, some effects, for example where the different threshold of activation of SCN9A has specific effects on cellular activity (in this case in DRG neurons, Dib-Hajj et al., 2012)<sup>4</sup> which are highly unlikely to be conserved in (for example) SCN4A in muscle cells. In these cases, the reductionist effect on voltage dependence of activation may be conserved, but the cellular effect divergent.

## References

1. Liu Y, Schubert J, Sonnenberg L, et al. Neuronal mechanisms of mutations in SCN8A causing epilepsy or intellectual disability. *Brain*. 2019;142(2):376-390.
2. Cestèle S, Schiavon E, Rusconi R, Franceschetti S, Mantegazza M. Nonfunctional NaV1.1 familial hemiplegic migraine mutant transformed into gain of function by partial rescue of folding defects. *Proc Natl Acad Sci USA*. 2013;110(43):17546-17551.
3. Mason ER, Wu F, Patel RR, Xiao Y, Cannon SC, Cummins TR. Resurgent and Gating Pore Currents Induced by De Novo SCN2A Epilepsy Mutations. *eNeuro*. 2019;6(5)
4. Dib-Hajj SD, Yang Y, Black JA, Waxman SG. The NaV1.7 sodium channel: from molecule to man. *Nature Reviews Neuroscience*. 2013;14(1):49-62.

## Supplementary Table 1: SCN Functionally Characterized Variants

| No.                              | Gene   | Variant | Overall effect | Reference for function                                    | Primary disease | Reference for phenotype                                       | SCN1A Equivalent | gnomAD frequency | Conservation |
|----------------------------------|--------|---------|----------------|-----------------------------------------------------------|-----------------|---------------------------------------------------------------|------------------|------------------|--------------|
| <b>1-128 Cytoplasmic segment</b> |        |         |                |                                                           |                 |                                                               |                  |                  |              |
| 1                                | SCN5A  | G9V     | STW            | Glazer (2020) <sup>1</sup>                                | LQT3            | Millat (2006) <sup>2</sup><br>Gutter (2013) <sup>3</sup>      | G10V             | -                | NC           |
| 2                                | SCN9A  | Q10R    | GoF            | Han (2009) <sup>4</sup>                                   | IEM             | Han (2009) <sup>4</sup>                                       | D12R             | 1.29e-4          | NC           |
| 3                                | SCN2A  | D12N    | LoF            | Ben-Shalom (2017) <sup>5</sup>                            | ASD             | Ben-Shalom (2017) <sup>5</sup>                                | D12N             | -                | NC           |
| 4                                | SCN5A  | R18W    | GoF            | Gutter (2013) <sup>3</sup>                                | LQT3            | Tester (2005) <sup>6</sup>                                    | R19W             | 2.57e-4          | NC           |
| 5                                | SCN5A  | R27H    | LoF            | Gutter (2013) <sup>3</sup>                                | BrS             | Priori (2002) <sup>7</sup>                                    | R28H             | 2.36e-4          | NC           |
| 6                                | SCN5A  | E30G    | STW            | Kapplinger (2015) <sup>8</sup>                            | LQT3            | Kapplinger (2015) <sup>8</sup>                                | E31G             | -                | NC           |
| 7                                | SCN5A  | R43Q    | STW            | Lin (2008) <sup>9</sup>                                   | LQT3            | Lin (2008) <sup>9</sup>                                       | K41Q             | 4.85e-5          | NC           |
| 8                                | SCN1A  | E78D    | LoF            | Kluckova (2020) <sup>10</sup>                             | EPI             | Mancardi (2006) <sup>11</sup>                                 | E78D             | -                | -            |
| 9                                | SCN5A  | D84N    | LoF            | Glazer (2020) <sup>1</sup>                                | BrS             | Kapplinger (2010) <sup>12</sup>                               | D81N             | -                | -            |
| 10                               | SCN2A  | D82G    | LoF            | Ben-Shalom (2017) <sup>5</sup>                            | ASD             | Ben-Shalom (2017) <sup>5</sup>                                | D81G             | -                | -            |
| 11                               | SCN5A  | F93S    | LoF            | Glazer (2020) <sup>1</sup>                                | BrS             | Kapplinger (2010) <sup>12</sup>                               | F90S             | -                | -            |
| 12                               | SCN10A | V94G    | LoF            | Jabbari (2015) <sup>13</sup>                              | AF              | Jabbari (2015) <sup>13</sup>                                  | V92G             | -                | -            |
| 13                               | SCN4A  | R104H   | LoF            | Zaharieva (2016) <sup>14</sup>                            | CMS             | Zaharieva (2016) <sup>14</sup>                                | R101H            | 4.01e-6          | -            |
| 14                               | SCN5A  | R104Q   | LoF            | Gutter (2013) <sup>3</sup>                                | BrS             | Levy-Nissenbaum (2001) <sup>15</sup>                          | R101Q            | -                | -            |
| 15                               | SCN5A  | R104W   | LoF            | Clatot (2012) <sup>16</sup>                               | BrS             | Clatot (2012) <sup>16</sup>                                   | R101W            | 4.01e-6          | -            |
| 16                               | SCN5A  | N109K   | STW            | Glazer (2020) <sup>1</sup>                                | BrS             | Kapplinger (2010) <sup>12</sup>                               | S106K            | 4.01e-6          | NC           |
| 17                               | SCN5A  | R121W   | LoF            | Clatot (2012) <sup>16</sup><br>Glazer (2020) <sup>1</sup> | BrS             | Kapplinger (2010) <sup>12</sup><br>Holst (2010) <sup>17</sup> | R118W            | -                | -            |
| 18                               | SCN5A  | A124D   | LoF            | Moreau (2012) <sup>18</sup>                               | BrS             | Moreau (2012) <sup>18</sup>                                   | A121D            | -                | NC           |
| 19                               | SCN5A  | V125L   | GoF            | Gutter (2013) <sup>3</sup>                                | LQT3            | Kapplinger (2009) <sup>19</sup>                               | I122L            | 2.17e-4          | NC           |

|                              |        |       |       |                                       |     |                                                                |       |         |    |
|------------------------------|--------|-------|-------|---------------------------------------|-----|----------------------------------------------------------------|-------|---------|----|
| 20                           | SCN5A  | K126E | LoF   | Gutter (2013) <sup>3</sup>            | BrS | Gutter (2013) <sup>3</sup>                                     | K123E | -       | NC |
| <b>129-147 S1 of D1</b>      |        |       |       |                                       |     |                                                                |       |         |    |
| 21                           | SCN5A  | L136P | LoF   | Glazer (2020) <sup>1</sup>            | BrS | Yokokawa (2007) <sup>20</sup><br>Yamagata (2017) <sup>21</sup> | L133P | -       | NC |
| 22                           | SCN8A  | M139I | GoF   | Zaman (2019) <sup>22</sup>            | EPI | Zaman (2019) <sup>22</sup>                                     | M135I | -       | NC |
| 23                           | SCN4A  | I141V | GoF   | Petitprez (2008) <sup>23</sup>        | PMC | Petitprez (2008) <sup>23</sup>                                 | I138V | -       | NC |
| 24                           | SCN9A  | I136V | GoF   | Cheng (2008) <sup>24</sup>            | IEM | Lee (2007) <sup>25</sup>                                       |       | -       | NC |
| 25                           | SCN1A  | M145T | LoF   | Mantegazza (2005) <sup>26</sup>       | EPI | Mantegazza (2005) <sup>26</sup>                                | M145T | -       | -  |
| <b>148-154 Extracellular</b> |        |       |       |                                       |     |                                                                |       |         |    |
| <b>155-175 S2 of D1</b>      |        |       |       |                                       |     |                                                                |       |         |    |
| 26                           | SCN5A  | E161K | LoF   | Smits (2005a) <sup>27</sup>           | BrS | Smits (2005a) <sup>27</sup>                                    | E158K | 4.15e-6 | -  |
| 27                           | SCN10A | Y158D | GoF   | Savio-Galimberti (2014) <sup>28</sup> | AF  | Savio-Galimberti (2014) <sup>28</sup>                          | Y159D | 2.58e-4 | NC |
| 28                           | SCN5A  | K175N | LoF   | Glazer (2020) <sup>1</sup>            | BrS | Kapplinger (2010) <sup>12</sup>                                | K172N | -       | -  |
| 29                           | SCN5A  | A178G | LoF   | Glazer (2020) <sup>1</sup>            | BrS | Kapplinger (2010) <sup>12</sup>                                | A175G | -       | -  |
| <b>176-189 Cytoplasmic</b>   |        |       |       |                                       |     |                                                                |       |         |    |
| 30                           | SCN1A  | G177A | LoF   | Nissenkorn (2019) <sup>29</sup>       | EPI | Nissenkorn (2019) <sup>29</sup>                                | G177A | -       | -  |
| 31                           | SCN1A  | G177E | LoF   | Ohmori (2006) <sup>30</sup>           | EPI | Ohmori (2006) <sup>30</sup>                                    | G177E | -       | -  |
| 32                           | SCN5A  | T187I | LoF   | Makiyama (2005) <sup>31</sup>         | BrS | Makiyama (2005) <sup>31</sup>                                  | T184I | -       | NC |
| 33                           | SCN2A  | R188W | Mixed | Sugawara (2001) <sup>32</sup>         | EPI | Sugawara (2001) <sup>32</sup>                                  | R187W | 1.99e-5 | -  |
| <b>190-207 S3 of D1</b>      |        |       |       |                                       |     |                                                                |       |         |    |
| 34                           | SCN4A  | M203K | LoF   | Zaharieva (2016) <sup>14</sup>        | CMS | Zaharieva (2016) <sup>14</sup>                                 | F200K | 7.99e-6 | NC |
| 35                           | SCN2A  | V208E | GoF   | Lauxmann (2018) <sup>33</sup>         | EPI | Lauxmann (2018) <sup>33</sup><br>Lemke (2012) <sup>34</sup>    | V207E | -       | NC |
| <b>208-213 Extracellular</b> |        |       |       |                                       |     |                                                                |       |         |    |

|                            |        |       |       |                                                             |           |                                                                                                                |       |         |    |
|----------------------------|--------|-------|-------|-------------------------------------------------------------|-----------|----------------------------------------------------------------------------------------------------------------|-------|---------|----|
| 36                         | SCN5A  | S216L | Mixed | Marangoni (2011) <sup>35</sup><br>Wang (2007) <sup>36</sup> | LQT3; BrS | Marangoni (2011) <sup>35</sup><br>Wang (2007) <sup>36</sup>                                                    | S213L | 8.09e-5 | NC |
| 37                         | SCN9A  | S211P | GoF   | Estacion (2010) <sup>37</sup>                               | IEM       | Estacion (2010) <sup>37</sup>                                                                                  | S213P | -       | NC |
| <b>214-230 S4 of D1</b>    |        |       |       |                                                             |           |                                                                                                                |       |         |    |
| 38                         | SCN11A | R222H | GoF   | Han (2017) <sup>38</sup>                                    | PPN       | Han (2017) <sup>38</sup><br>Okuda (2016) <sup>39</sup>                                                         | R216H | -       | -  |
| 39                         | SCN5A  | T220I | STW   | Glazer (2020) <sup>1</sup>                                  | BrS       | Kapplinger (2010) <sup>12</sup>                                                                                | T217I | 7.14e-4 | NC |
| 40                         | SCN9A  | F216S | GoF   | Choi (2006) <sup>40</sup><br>Sheets (2007) <sup>41</sup>    | IEM       | Drenth (2005) <sup>42</sup><br>Kim (2013) <sup>43</sup>                                                        | F218S | -       | -  |
| 41                         | SCN8A  | R223G | LoF   | De Kovel (2014) <sup>44</sup>                               | EPI       | De Kovel (2014) <sup>44</sup>                                                                                  | R219G | -       | -  |
| 42                         | SCN5A  | V223L | LoF   | Glazer (2020) <sup>1</sup>                                  | BrS       | Kapplinger (2010) <sup>12</sup>                                                                                | V220L | -       | -  |
| 43                         | SCN4A  | R225W | LoF   | Zaharieva (2016) <sup>14</sup>                              | CMS       | Zaharieva (2016) <sup>14</sup>                                                                                 | R222W | -       | -  |
| 44                         | SCN5A  | R225W | LoF   | Bezzina (2003) <sup>45</sup>                                | LQT3; BrS | Kapplinger (2009) <sup>19</sup><br>Kapplinger (2010) <sup>12</sup>                                             |       | -       | -  |
| 45                         | SCN5A  | R225P | GoF   | Beckermann<br>(2014) <sup>46</sup>                          | LQT3      | Beckermann (2014) <sup>46</sup>                                                                                | R222P | -       | -  |
| 46                         | SCN5A  | A226V | LoF   | Tan (2016) <sup>47</sup>                                    | BrS       | Tan (2016) <sup>47</sup>                                                                                       | A223V | -       | -  |
| 47                         | SCN1A  | T226M | Mixed | Berecki (2019) <sup>48</sup>                                | EPI       | Sadleir (2017) <sup>49</sup>                                                                                   | T226M | -       | NC |
| 48                         | SCN1A  | I227S | LoF   | Ohmori (2006) <sup>30</sup>                                 | EPI       | Nabbout (2003) <sup>50</sup>                                                                                   | I227S | -       | NC |
| 49                         | SCN5A  | V232I | STW   | Barajaz-Martinez<br>(2008) <sup>51</sup>                    | BrS       | Barajaz-Martinez (2008) <sup>51</sup><br>Kapplinger (2010) <sup>12</sup><br>[compound missense with<br>L1308F] | V229I | -       | NC |
| 50                         | SCN9A  | I228M | GoF   | Estacion (2011) <sup>52</sup>                               | SFN       | Estacion (2011) <sup>52</sup><br>Faber (2012) <sup>53</sup>                                                    | I230M | 8.58-e4 | NC |
| <b>231-249 Cytoplasmic</b> |        |       |       |                                                             |           |                                                                                                                |       |         |    |
| 51                         | SCN2A  | T236S | GoF   | Thompson (2020) <sup>54</sup>                               | EPI       | Nakamura (2013) <sup>55</sup>                                                                                  | T235S | 3.98e-6 | NC |
| 52                         | SCN9A  | I234T | GoF   | Ahn (2010) <sup>56</sup>                                    | IEM       | Ahn (2010) <sup>56</sup>                                                                                       | I236T | -       | -  |
| 53                         | SCN4A  | S246L | STW   | Tsujino (2003) <sup>57</sup>                                | CMS       | Tsujino (2003) <sup>57</sup>                                                                                   | S243L | -       | NC |
| 54                         | SCN9A  | S241T | GoF   | Lampert (2006) <sup>58</sup>                                | IEM       | Lampert (2006) <sup>58</sup><br>Michiels (2005) <sup>59</sup>                                                  | S243T | -       | -  |
| 55                         | SCN10A | S242T | GoF   | Han (2018) <sup>60</sup>                                    | PPN       | Han (2018) <sup>60</sup>                                                                                       |       | 1.91-e4 | -  |

|                              |       |       |       |                                                                                         |                            |                                                                 |       |         |    |
|------------------------------|-------|-------|-------|-----------------------------------------------------------------------------------------|----------------------------|-----------------------------------------------------------------|-------|---------|----|
| 56                           | SCN3A | L247P | LoF   | Lamar (2017) <sup>61</sup>                                                              | EPI                        | Lamar (2017) <sup>61</sup>                                      | L247P | -       | -  |
| 57                           | SCN1A | D249E | LoF   | Kluckova (2020) <sup>10</sup>                                                           | EPI                        | Kluckova (2020) <sup>10</sup>                                   | D249E | -       | NC |
| <b>250-269 S5 of D1</b>      |       |       |       |                                                                                         |                            |                                                                 |       |         |    |
| 58                           | SCN1A | S259R | LoF   | Nissenkorn (2019) <sup>29</sup>                                                         | EPI                        | Nissenkorn (2019) <sup>29</sup>                                 | S259R | -       | -  |
| 59                           | SCN2A | A263V | GoF   | Liao (2010a) <sup>62</sup>                                                              | EPI                        | Liao (2010a) <sup>62</sup><br>Schwarz (2016) <sup>63</sup>      | A262V | -       | -  |
| 60                           | SCN1A | L263V | GoF   | Kahlig (2008) <sup>64</sup>                                                             | FHM                        | Kahlig (2008) <sup>64</sup>                                     | L263V | -       | -  |
| 61                           | SCN8A | G269R | LoF   | Wengert (2019) <sup>65</sup>                                                            | NDD<br>without<br>epilepsy | Wengert (2019) <sup>65</sup>                                    | G265R | -       | -  |
| 62                           | SCN4A | Q270K | Mixed | Carle (2009) <sup>66</sup>                                                              | PMC                        | Carle (2009) <sup>66</sup>                                      | Q267K | -       | -  |
| 63                           | SCN5A | Q270K | Mixed | Calloe (2011) <sup>67</sup>                                                             | LQT3                       | Calloe (2011) <sup>67</sup>                                     |       | -       | -  |
| <b>270-367 Extracellular</b> |       |       |       |                                                                                         |                            |                                                                 |       |         |    |
| 64                           | SCN5A | L276Q | LoF   | Glazer (2020) <sup>1</sup>                                                              | BrS                        | Sommariva (2013) <sup>68</sup><br>Yamagata (2017) <sup>21</sup> | L273Q | -       | -  |
| 65                           | SCN5A | R282H | LoF   | Polezing (2006) <sup>69</sup>                                                           | BrS                        | Priori (2002) <sup>7</sup><br>Itoh (2005) <sup>70</sup>         | Q279H | 1.60e-5 | NC |
| 66                           | SCN5A | R282C | LoF   | Glazer (2020) <sup>1</sup>                                                              | BrS                        | Andorin (2016) <sup>71</sup>                                    | Q279C | -       | NC |
| 67                           | SCN1A | T297I | LoF   | Binini (2017) <sup>72</sup>                                                             | EPI                        | Binini (2017) <sup>72</sup>                                     | T297I | -       | NC |
| 68                           | SCN5A | L325R | LoF   | Keller (2005) <sup>73</sup>                                                             | BrS                        | Keller (2005) <sup>73</sup>                                     | L335R | -       | NC |
| 69                           | SCN5A | C335R | LoF   | Glazer (2020) <sup>1</sup>                                                              | BrS                        | Van Malderen (2017) <sup>74</sup>                               | C345R | -       | -  |
| 70                           | SCN5A | P336L | LoF   | Cordeiro (2006) <sup>75</sup>                                                           | BrS                        | Cordeiro (2006) <sup>75</sup>                                   | P346L | -       | NC |
| 71                           | SCN3A | K354Q | GoF   | Estacion (2010) <sup>76</sup>                                                           | EPI                        | Holland (2008) <sup>77</sup>                                    | K353Q | -       | NC |
| 72                           | SCN5A | E346D | Mixed | Glazer (2020) <sup>1</sup>                                                              | BrS                        | Probst (2006) <sup>78</sup>                                     | R356D | -       | NC |
| 73                           | SCN4A | P382T | LoF   | Zaharieva (2016) <sup>14</sup>                                                          | CMS                        | Zaharieva (2016) <sup>14</sup>                                  | P358T | -       | -  |
| 74                           | SCN5A | D349N | LoF   | Glazer (2020) <sup>1</sup>                                                              | BrS                        | Savastano (2014) <sup>79</sup>                                  | N359N | 1.43e-5 | NC |
| 75                           | SCN5A | T353I | LoF   | Pfahnl (2007) <sup>80</sup><br>Zhang (2015) <sup>81</sup><br>Glazer (2020) <sup>1</sup> | BrS                        | Pfahnl (2007) <sup>80</sup>                                     | T363I | -       | -  |



|                              |        |       |       |                                                                                                   |          |                                                                                            |       |         |    |
|------------------------------|--------|-------|-------|---------------------------------------------------------------------------------------------------|----------|--------------------------------------------------------------------------------------------|-------|---------|----|
| 76                           | SCN5A  | D356N | LoF   | Makiyama (2005) <sup>31</sup>                                                                     | BrS      | Makiyama (2005) <sup>31</sup>                                                              | D366N | 4.02e-6 | -  |
| <b>368-392 Pore-forming</b>  |        |       |       |                                                                                                   |          |                                                                                            |       |         |    |
| 77                           | SCN5A  | R367C | LoF   | Glazer (2020) <sup>1</sup>                                                                        | BrS      | Kapplinger (2010) <sup>12</sup><br>Amin (2011) <sup>82</sup>                               | R377C | 1.07e-5 | -  |
| 78                           | SCN2A  | R379H | LoF   | Ben-Shalom (2017) <sup>5</sup>                                                                    | ASD      | Ben-Shalom (2017) <sup>5</sup>                                                             | R377H | -       | -  |
| 79                           | SCN5A  | R367H | LoF   | Hong (2004) <sup>83</sup>                                                                         | BrS      | Hong (2004) <sup>83</sup>                                                                  |       | -       | -  |
| 80                           | SCN5A  | R367L | LoF   | Glazer (2020) <sup>1</sup>                                                                        | BrS      | Kapplinger (2010) <sup>12</sup>                                                            | R377L | -       | -  |
| 81                           | SCN5A  | M369K | LoF   | Glazer (2020) <sup>1</sup>                                                                        | BrS      | Probst (2006) <sup>78</sup><br>Probst (2007) <sup>84</sup><br>Andorin (2016) <sup>71</sup> | M379K | -       | -  |
| 82                           | SCN5A  | W374G | LoF   | Nakajima (2021) <sup>85</sup>                                                                     | BrS      | Kapplinger (2010) <sup>12</sup><br>Nakajima (2021) <sup>85</sup>                           | W384G | -       | -  |
| 83                           | SCN5A  | R376H | LoF   | Rossenbacker (2004) <sup>86</sup><br>Frustaci (2005) <sup>87</sup><br>Peters (2016) <sup>88</sup> | BrS      | Rossenbacker (2004) <sup>86</sup><br>Frustaci (2005) <sup>87</sup>                         | N386H | 8.08e-6 | NC |
| 84                           | SCN8A  | N374K | GoF   | Zaman (2019) <sup>22</sup>                                                                        | EPI      | Zaman (2019) <sup>22</sup>                                                                 | N386K | -       | NC |
| <b>393-399 Extracellular</b> |        |       |       |                                                                                                   |          |                                                                                            |       |         |    |
| 85                           | SCN1A  | R393H | LoF   | Ohmori (2006) <sup>30</sup>                                                                       | EPI      | Claes (2003) <sup>89</sup>                                                                 | R393H | -       | -  |
| 86                           | SCN5A  | G386R | LoF   | Glazer (2020) <sup>1</sup>                                                                        | BrS      | Kapplinger (2010) <sup>12</sup>                                                            | G396R | -       | -  |
| <b>400-420 S6 of D1</b>      |        |       |       |                                                                                                   |          |                                                                                            |       |         |    |
| 87                           | SCN11A | I381T | GoF   | Huang (2014) <sup>90</sup>                                                                        | SFN      | Huang (2014) <sup>90</sup>                                                                 | V404T | 7.96e-6 | NC |
| 88                           | SCN5A  | V396L | LoF   | Glazer (2020) <sup>1</sup>                                                                        | BrS      | Kapplinger (2010) <sup>12</sup>                                                            | V406L | -       | NC |
| 89                           | SCN10A | L388M | LoF   | Gando (2020) <sup>91</sup>                                                                        | SUD      | Gando (2020) <sup>91</sup>                                                                 | L414M | -       | -  |
| 90                           | SCN4A  | N440K | GoF   | Lossin (2012) <sup>92</sup>                                                                       | PMC; PAM | Lossin (2012) <sup>92</sup>                                                                | N416K | -       | -  |
| 91                           | SCN5A  | N406K | Mixed | Hu (2018) <sup>93</sup><br>Kato (2014) <sup>94</sup>                                              | LQT3     | Hu (2018) <sup>93</sup><br>Kato (2014) <sup>94</sup>                                       |       | -       | -  |
| 92                           | SCN9A  | N395K | GoF   | Sheets (2007) <sup>41</sup>                                                                       | IEM      | Drenth (2005) <sup>42</sup>                                                                |       | -       | -  |
| 93                           | SCN5A  | N406S | LoF   | Itoh (2007) <sup>95</sup>                                                                         | BrS      | Itoh (2007) <sup>95</sup>                                                                  | N416S | -       | -  |
| <b>421-768 Cytoplasmic</b>   |        |       |       |                                                                                                   |          |                                                                                            |       |         |    |

|                         |        |       |       |                                                                                            |           |                                                                                           |       |         |    |
|-------------------------|--------|-------|-------|--------------------------------------------------------------------------------------------|-----------|-------------------------------------------------------------------------------------------|-------|---------|----|
| 94                      | SCN2A  | V423L | GoF   | Wolff (2017) <sup>96</sup>                                                                 | EPI       | Wolff (2017) <sup>96</sup>                                                                | V421L | -       | -  |
| 95                      | SCN4A  | V445M | GoF   | Wang (1999) <sup>97</sup><br>Huang (2020) <sup>98</sup>                                    | PMC       | Liu (2015) <sup>99</sup><br>Huang (2020) <sup>98</sup>                                    | V421M | -       | -  |
| 96                      | SCN5A  | V411M | GoF   | Horne (2011) <sup>100</sup><br>Zhou (2015) <sup>101</sup>                                  | LQT3      | Horne (2011) <sup>100</sup><br>Zhou (2015) <sup>101</sup>                                 |       | -       | -  |
| 97                      | SCN9A  | V400M | GoF   | Fischer (2009) <sup>102</sup>                                                              | IEM       | Fischer (2009) <sup>102</sup>                                                             |       | -       | -  |
| 98                      | SCN1A  | Y426N | LoF   | Ohmori (2006) <sup>30</sup>                                                                | EPI       | Nabbout (2003) <sup>50</sup>                                                              | Y426N | -       | -  |
| 99                      | SCN5A  | R458C | GoF   | Winkel (2015) <sup>103</sup>                                                               | LQT3      | Winkel (2015) <sup>103</sup>                                                              | D481C | 1.45e-4 | NC |
| 100                     | SCN5A  | A551T | LoF   | Chiang (2009) <sup>104</sup><br>Juang (2014) <sup>105</sup>                                | BrS       | Chiang (2009) <sup>104</sup><br>Juang (2014) <sup>105</sup>                               | F598T | -       | NC |
| 101                     | SCN5A  | H558R | STW   | Ye (2003) <sup>106</sup><br>Tester (2010) <sup>107</sup><br>Veltmann (2016) <sup>108</sup> | LQT3; BrS | Ye (2003) <sup>106</sup><br>Veltmann (2016) <sup>108</sup><br>Juang (2014) <sup>105</sup> | R605R | 0.22    | NC |
| 102                     | SCN5A  | L567Q | LoF   | Wan (2001) <sup>109</sup>                                                                  | BrS       | Priori (2000) <sup>110</sup>                                                              | H614Q | -       | NC |
| 103                     | SCN5A  | R569W | GoF   | Kapplinger (2015) <sup>8</sup>                                                             | LQT3      | Kapplinger (2015) <sup>8</sup>                                                            | E616W | 8.03e-6 | NC |
| 104                     | SCN5A  | A572D | STW   | Tester (2010) <sup>107</sup>                                                               | LQT3      | Tester (2010) <sup>107</sup>                                                              | N619D | 5.18e-3 | NC |
| 105                     | SCN10A | L554P | GoF   | Faber (2012) <sup>111</sup>                                                                | PPN       | Faber (2012) <sup>111</sup>                                                               | R630P | 8.60e-5 | NC |
| 106                     | SCN5A  | N592K | LoF   | Juang (2014) <sup>105</sup>                                                                | BrS       | Juang (2014) <sup>105</sup>                                                               | H642K | 3.23e-5 | NC |
| 107                     | SCN9A  | D623N | GoF   | Ahn (2013) <sup>112</sup>                                                                  | SFN       | Faber (2012) <sup>53</sup>                                                                | D646N | -       | -  |
| 108                     | SCN5A  | L619F | GoF   | Wehrens (2003) <sup>113</sup>                                                              | LQT3      | Wehrens (2003) <sup>113</sup>                                                             | L668F | 4.03e-5 | NC |
| 109                     | SCN5A  | R620H | STW   | Calloe (2013) <sup>114</sup><br>Glazer (2020) <sup>1</sup>                                 | BrS       | Calloe (2013) <sup>114</sup>                                                              | P669H | 3.14e-5 | NC |
| 110                     | SCN5A  | R689H | LoF   | Hong (2012) <sup>115</sup>                                                                 | BrS       | Hong (2012) <sup>115</sup>                                                                | K740H | 9.25e-5 | NC |
| 111                     | SCN10A | M650K | Mixed | Kist (2016) <sup>116</sup>                                                                 | IEM       | Kist (2016) <sup>116</sup>                                                                | Y753K | 5.45e-4 | NC |
| <b>769-787 S1 of D2</b> |        |       |       |                                                                                            |           |                                                                                           |       |         |    |
| 112                     | SCN9A  | I739V | GoF   | Han (2012) <sup>117</sup>                                                                  | SFN       | Faber (2012) <sup>53</sup><br>Han (2012) <sup>117</sup>                                   | I774V | 2.47e-3 | -  |
| 113                     | SCN2A  | T773I | GoF   | Lauxmann (2018) <sup>33</sup>                                                              | EPI       | Lauxmann (2018) <sup>33</sup>                                                             | T782I | -       | -  |
| 114                     | SCN8A  | T767I | GoF   | Estacion (2014) <sup>118</sup><br>Pan (2020) <sup>119</sup>                                | EPI       | Estacion (2014) <sup>118</sup>                                                            |       | -       | -  |

|                              |        |       |       |                                   |                      |                                                                                                                                |       |         |    |
|------------------------------|--------|-------|-------|-----------------------------------|----------------------|--------------------------------------------------------------------------------------------------------------------------------|-------|---------|----|
| 115                          | SCN5A  | M734V | LoF   | Glazer (2020) <sup>1</sup>        | BrS                  | Le Scouarnec (2015) <sup>120</sup>                                                                                             | M785V | -       | NC |
| 116                          | SCN5A  | A735E | LoF   | Glazer (2020) <sup>1</sup>        | BrS                  | Priori (2002) <sup>7</sup><br>Nakajima (2011) <sup>121</sup>                                                                   | A786E | -       | -  |
| 117                          | SCN5A  | A735T | LoF   | Glazer (2020) <sup>1</sup>        | BrS                  | García-Castro (2010) <sup>122</sup>                                                                                            | A786T | -       | -  |
| 118                          | SCN5A  | A735V | LoF   | De la Roche (2019) <sup>123</sup> | BrS                  | De la Roche (2019) <sup>123</sup>                                                                                              | A786V | 4.01e-6 | -  |
| <b>788-798 Extracellular</b> |        |       |       |                                   |                      |                                                                                                                                |       |         |    |
| 119                          | SCN1A  | E788K | LoF   | Kluckova (2020) <sup>10</sup>     | EPI                  | Kluckova (2020) <sup>10</sup>                                                                                                  | E788K | -       | -  |
| 120                          | SCN1A  | Y790C | LoF   | Bechi (2015) <sup>124</sup>       | EPI                  | Annesi (2003) <sup>125</sup>                                                                                                   | Y790C | -       | NC |
| 121                          | SCN5A  | E746K | LoF   | Glazer (2020) <sup>1</sup>        | BrS                  | Peters (2008) <sup>126</sup>                                                                                                   | N797K | 2.14e-5 | NC |
| <b>799-818 S2 of D2</b>      |        |       |       |                                   |                      |                                                                                                                                |       |         |    |
| 122                          | SCN5A  | G752R | LoF   | Glazer (2020) <sup>1</sup>        | BrS                  | Smits (2002) <sup>127</sup><br>Probst (2006) <sup>78</sup><br>Probst (2009) <sup>128</sup><br>Hoogendijk (2010) <sup>129</sup> | G803R | 4.03e-6 | -  |
| 123                          | SCN1A  | T808S | Mixed | Rhodes (2005) <sup>130</sup>      | EPI                  | Fujiwara (2003) <sup>131</sup><br>[compound missense with N1011I]                                                              | T808S | -       | -  |
| <b>819-832 Cytoplasmic</b>   |        |       |       |                                   |                      |                                                                                                                                |       |         |    |
| 124                          | SCN5A  | D772N | Mixed | Glazer (2020) <sup>1</sup>        | LQT3; BrS            | Kapplinger (2009) <sup>19</sup><br>Kapplinger (2010) <sup>12</sup>                                                             | D823N | 2.01e-5 | -  |
| 125                          | SCN5A  | P773S | STW   | Glazer (2020) <sup>1</sup>        | BrS                  | Kapplinger (2010) <sup>12</sup>                                                                                                | P824S | -       | NC |
| <b>833-852 S3 of D2</b>      |        |       |       |                                   |                      |                                                                                                                                |       |         |    |
| 126                          | SCN5A  | D785N | LoF   | Glazer (2020) <sup>1</sup>        | BrS                  | Sayeed (2014) <sup>132</sup>                                                                                                   | D836N | -       | -  |
| 127                          | SCN8A  | G822R | LoF   | Wengert (2019) <sup>65</sup>      | NDD without epilepsy | Wengert (2019) <sup>65</sup>                                                                                                   | G837R | -       | NC |
| <b>853-854 Extracellular</b> |        |       |       |                                   |                      |                                                                                                                                |       |         |    |
| <b>855-872 S4 of D2</b>      |        |       |       |                                   |                      |                                                                                                                                |       |         |    |
| 128                          | SCN9A  | L823R | Mixed | Lampert (2009) <sup>133</sup>     | IEM                  | Lampert (2009) <sup>133</sup>                                                                                                  | L858R | -       | -  |
| 129                          | SCN10A | R756W | LoF   | Gando (2020) <sup>91</sup>        | SUD                  | Gando (2020) <sup>91</sup>                                                                                                     | R859W | 5.68e-5 | -  |
| 130                          | SCN1A  | R859H | LoF   | Volkers (2011) <sup>134</sup>     | EPI                  | Volkers (2011) <sup>134</sup>                                                                                                  | R859H | 7.99e-6 | -  |

|                            |        |       |       |                                                                                              |                |                                                                                                                                                                                                                           |       |         |    |
|----------------------------|--------|-------|-------|----------------------------------------------------------------------------------------------|----------------|---------------------------------------------------------------------------------------------------------------------------------------------------------------------------------------------------------------------------|-------|---------|----|
| 131                        | SCN4A  | R669H | LoF   | Kuzmenkin (2002) <sup>135</sup>                                                              | HypoPP         | Bulman (1999) <sup>136</sup>                                                                                                                                                                                              |       | 8.05e-6 | -  |
| 132                        | SCN1A  | R859C | LoF   | Bechi (2015) <sup>124</sup>                                                                  | EPI            | Depienne (2009) <sup>137</sup>                                                                                                                                                                                            | R859C | -       | -  |
| 133                        | SCN5A  | R808C | LoF   | Glazer (2020) <sup>1</sup>                                                                   | BrS            | Kotta (2010) <sup>138</sup>                                                                                                                                                                                               |       | 8.07e-6 | -  |
| 134                        | SCN9A  | F826Y | GoF   | Wu (2017) <sup>139</sup>                                                                     | IEM            | Wu (2017) <sup>139</sup>                                                                                                                                                                                                  | F861Y | -       | -  |
| 135                        | SCN4A  | R672G | LoF   | Jurkatt-Rott (2000) <sup>140</sup><br>Kuzmenkin (2002) <sup>135</sup>                        | HypoPP         | Jurkatt-Rott (2000) <sup>140</sup>                                                                                                                                                                                        | R862G | -       | -  |
| 136                        | SCN4A  | R672H | LoF   | Jurkatt-Rott (2000) <sup>140</sup><br>Kuzmenkin (2002) <sup>135</sup>                        | HypoPP         | Jurkatt-Rott (2000) <sup>140</sup>                                                                                                                                                                                        | R862H | 1.21e-5 | -  |
| 137                        | SCN5A  | R811H | LoF   | Calloe (2013) <sup>114</sup>                                                                 | BrS            | Calloe (2013) <sup>114</sup>                                                                                                                                                                                              |       | 1.22e-5 | -  |
| 138                        | SCN2A  | R853Q | Mixed | Berecki (2018) <sup>141</sup><br>Mason (2019) <sup>142</sup>                                 | EPI            | Nakamura (2013) <sup>55</sup><br>Epi (2013) <sup>143</sup><br>Samanta (2015) <sup>144</sup><br>Kobayashi (2016) <sup>145</sup><br>Li (2016) <sup>146</sup><br>Wolff (2017) <sup>96</sup><br>Berecki (2018) <sup>141</sup> | R862Q | -       | -  |
| 139                        | SCN3A  | L855P | GoF   | Zaman (2020) <sup>147</sup>                                                                  | Fetal Akinesia | Zaman (2020) <sup>147</sup>                                                                                                                                                                                               | L863P | -       | NC |
| 140                        | SCN5A  | L812Q | LoF   | Wang (2015) <sup>148</sup>                                                                   | BrS            | Wang (2015) <sup>148</sup>                                                                                                                                                                                                | L863Q | -       | -  |
| 141                        | SCN1A  | R865G | GoF   | Volkers (2011) <sup>134</sup>                                                                | EPI            | Volkers (2011) <sup>134</sup>                                                                                                                                                                                             | R865G | -       | -  |
| 142                        | SCN4A  | R675Q | Mixed | Wu (2014) <sup>149</sup>                                                                     | NormoPP        | Wu (2014) <sup>149</sup>                                                                                                                                                                                                  | R865Q | 8.19e-6 | -  |
| 143                        | SCN5A  | R814Q | Mixed | Glazer (2020) <sup>1</sup>                                                                   | LQT3; BrS      | Frigo (2007) <sup>150</sup><br>Sommariva (2013) <sup>68</sup><br>Itoh (2016) <sup>151</sup><br>Yamagata (2017) <sup>21</sup>                                                                                              |       | 2.51e-5 | -  |
| 144                        | SCN5A  | K817E | LoF   | Kinoshita (2016) <sup>152</sup>                                                              | BrS            | Kinoshita (2016) <sup>152</sup>                                                                                                                                                                                           | K868E | -       | -  |
| <b>873-888 Cytoplasmic</b> |        |       |       |                                                                                              |                |                                                                                                                                                                                                                           |       |         |    |
| 145                        | SCN1A  | T875M | LoF   | Lossin (2002) <sup>153</sup>                                                                 | EPI            | Escayg (2000) <sup>154</sup>                                                                                                                                                                                              | T875M | -       | -  |
| 146                        | SCN3A  | I875T | GoF   | Zaman (2018) <sup>155</sup><br>Zaman (2020) <sup>147</sup>                                   | EPI/PMG        | Zaman (2018) <sup>155</sup><br>Miyatake (2018) <sup>156</sup><br>Zaman (2020) <sup>147</sup>                                                                                                                              | I883T | -       | -  |
| 147                        | SCN9A  | I848T | GoF   | Cummins (2004) <sup>157</sup><br>Namer (2015) <sup>158</sup><br>Thiele (2011) <sup>159</sup> | IEM            | Yang (2004) <sup>160</sup><br>Drenth (2005) <sup>42</sup><br>Namer (2015) <sup>158</sup>                                                                                                                                  |       | -       | -  |
| 148                        | SCN11A | G699R | GoF   | Han (2015) <sup>161</sup>                                                                    | SFN            | Han (2015) <sup>161</sup>                                                                                                                                                                                                 | G888R | 1.63e-4 | -  |
| <b>889-907 S5 of D2</b>    |        |       |       |                                                                                              |                |                                                                                                                                                                                                                           |       |         |    |

|                              |        |       |     |                                                                                                                                   |                 |                                                             |       |         |    |
|------------------------------|--------|-------|-----|-----------------------------------------------------------------------------------------------------------------------------------|-----------------|-------------------------------------------------------------|-------|---------|----|
| 149                          | SCN5A  | L839P | LoF | Glazer (2020) <sup>1</sup>                                                                                                        | BrS             | Kapplinger (2010) <sup>12</sup>                             | L890P | -       | -  |
| 150                          | SCN9A  | G856D | GoF | Hoeijmakers (2012) <sup>162</sup>                                                                                                 | IEM; SFN        | Hoeijmakers (2012) <sup>162</sup>                           | G891D | -       | -  |
| 151                          | SCN9A  | G856R | GoF | Tanaka (2017) <sup>163</sup>                                                                                                      | IEM             | Tanaka (2017) <sup>163</sup>                                | G891R | -       | -  |
| 152                          | SCN9A  | L858F | GoF | Han (2006) <sup>164</sup><br>Han (2007) <sup>165</sup><br>Cregg (2014) <sup>166</sup>                                             | IEM             | Han (2006) <sup>164</sup><br>Drenth (2005) <sup>42</sup>    | L893F | -       | -  |
| 153                          | SCN9A  | L858H | GoF | Cummins (2004) <sup>157</sup><br>Estacion (2010) <sup>167</sup><br>Thiele (2011) <sup>159</sup><br>Vasylyev (2014) <sup>168</sup> | IEM             | Yang (2004) <sup>160</sup>                                  | L893H | -       | -  |
| 154                          | SCN4A  | T704M | GoF | Bendahhou (1999) <sup>169</sup>                                                                                                   | HyperPP;<br>PMC | Huang (2019) <sup>170</sup>                                 | T894M | -       | -  |
| 155                          | SCN9A  | A863P | GoF | Harty (2006) <sup>171</sup>                                                                                                       | IEM             | Harty (2006) <sup>171</sup>                                 | A898P | -       | NC |
| 156                          | SCN1A  | F902C | LoF | Rhodes (2004) <sup>172</sup>                                                                                                      | EPI             | Ohmori (2002) <sup>173</sup><br>- reported as F891C         | F902C | -       | -  |
| 157                          | SCN5A  | F851L | LoF | Glazer (2020) <sup>1</sup>                                                                                                        | BrS             | Priori (2002) <sup>7</sup>                                  | F902L | 7.07e-6 | -  |
| 158                          | SCN9A  | V872G | GoF | Choi (2009) <sup>174</sup>                                                                                                        | IEM             | Choi (2009) <sup>174</sup>                                  | V907G | -       | -  |
| <b>908-936 Extracellular</b> |        |       |     |                                                                                                                                   |                 |                                                             |       |         |    |
| 159                          | SCN2A  | G899S | LoF | Wolff (2017) <sup>96</sup>                                                                                                        | EPI             | Wolff (2017) <sup>96</sup>                                  | G908S | -       | -  |
| 160                          | SCN1A  | M909K | LoF | Kluckova (2020) <sup>10</sup>                                                                                                     | EPI             | Kluckova (2020) <sup>10</sup>                               | M909K | -       | NC |
| 161                          | SCN9A  | Q875E | GoF | Stadler (2015) <sup>175</sup>                                                                                                     | IEM             | Skeik 2012 <sup>176</sup>                                   | Q910E | -       | -  |
| 162                          | SCN10A | R814H | GoF | Savio-Galimberti (2014) <sup>28</sup>                                                                                             | AF              | Savio-Galimberti (2014) <sup>28</sup>                       | K917H | 3.08e-4 | NC |
| 163                          | SCN2A  | K908E | GoF | Lauxmann (2018) <sup>33</sup>                                                                                                     | EPI             | Wolff (2017) <sup>96</sup><br>Lauxmann (2018) <sup>33</sup> | K917E | -       | NC |
| 164                          | SCN9A  | R896Q | LoF | Cox (2010) <sup>177</sup>                                                                                                         | CIP             | Cox (2010) <sup>177</sup>                                   | R931Q | 1.06e-5 | NC |
| 165                          | SCN5A  | W879R | LoF | Glazer (2020) <sup>1</sup>                                                                                                        | BrS             | Glazer (2020) <sup>1</sup>                                  | W932R | -       | -  |
| <b>937-957 Pore-forming</b>  |        |       |     |                                                                                                                                   |                 |                                                             |       |         |    |
| 166                          | SCN1A  | H939Q | LoF | Ohmori (2006) <sup>30</sup>                                                                                                       | EPI             | Ohmori (2006) <sup>30</sup>                                 | H939Q | -       | -  |
| 167                          | SCN5A  | I890T | LoF | Tarradas (2013) <sup>178</sup>                                                                                                    | BrS             | Tarradas (2013) <sup>178</sup>                              | I943T | -       | NC |
| 168                          | SCN5A  | F892I | LoF | Glazer (2020) <sup>1</sup>                                                                                                        | BrS             | Savastano (2014) <sup>179</sup>                             | F945L | -       | -  |

|                              |        |       |     |                                                                  |                            |                                                                                                 |       |         |    |
|------------------------------|--------|-------|-----|------------------------------------------------------------------|----------------------------|-------------------------------------------------------------------------------------------------|-------|---------|----|
| 169                          | SCN1A  | R946C | LoF | Volkers (2011) <sup>134</sup>                                    | EPI                        | Volkers (2011) <sup>134</sup>                                                                   | R946C | -       | -  |
| 170                          | SCN2A  | R937C | LoF | Ben-Shalom (2017) <sup>5</sup><br>Begemann (2019) <sup>180</sup> | ASD                        | Ben-Shalom (2017) <sup>5</sup><br>Begemann (2019) <sup>180</sup><br>Rauch (2012) <sup>181</sup> |       | -       | -  |
| 171                          | SCN1A  | R946H | LoF | Liao (2010b) <sup>182</sup><br>Volkers (2011) <sup>134</sup>     | EPI                        | Liao (2010b) <sup>182</sup><br>Volkers (2011) <sup>134</sup>                                    | R946H | -       | -  |
| 172                          | SCN2A  | R937H | LoF | Ben-Shalom (2017) <sup>5</sup>                                   | ASD                        | Ben-Shalom (2017) <sup>5</sup>                                                                  |       | -       | -  |
| 173                          | SCN5A  | E901K | LoF | Glazer (2020) <sup>1</sup>                                       | BrS                        | Kapplinger (2010) <sup>12</sup>                                                                 | E954K | -       | -  |
| 174                          | SCN1A  | M956T | LoF | Bechi (2015) <sup>124</sup>                                      | EPI                        | Bechi (2015) <sup>124</sup>                                                                     | M956T | -       | -  |
| <b>958-970 Extracellular</b> |        |       |     |                                                                  |                            |                                                                                                 |       |         |    |
| 175                          | SCN1A  | C959R | LoF | Ohmori (2006) <sup>30</sup>                                      | EPI                        | Ohmori (2006) <sup>30</sup>                                                                     | C959R | -       | -  |
| 176                          | SCN5A  | S910L | LoF | Pambrun (2014) <sup>183</sup>                                    | BrS                        | Pambrun (2014) <sup>183</sup>                                                                   | A963L | 3.99e-6 | NC |
| 177                          | SCN10A | L867F | LoF | Gando (2020) <sup>91</sup>                                       | SUD                        | Gando (2020) <sup>91</sup>                                                                      | L969F | 2.85e-5 | NC |
| <b>971-991 S6 of D2</b>      |        |       |     |                                                                  |                            |                                                                                                 |       |         |    |
| 178                          | SCN1A  | G979R | LoF | Sugawara (2003) <sup>184</sup><br>Rhodes (2005) <sup>130</sup>   | EPI                        | Fujiwara (2003) <sup>131</sup>                                                                  | G979R | -       | -  |
| 179                          | SCN8A  | G964R | LoF | Wagnon (2017) <sup>185</sup>                                     | NDD<br>without<br>epilepsy | Wagnon (2017) <sup>185</sup>                                                                    |       | -       | -  |
| 180                          | SCN5A  | N927S | LoF | Glazer (2020) <sup>1</sup>                                       | BrS                        | Kapplinger (2010) <sup>12</sup>                                                                 | N980S | -       | NC |
| 181                          | SCN5A  | L928P | LoF | Glazer (2020) <sup>1</sup>                                       | BrS                        | Kapplinger (2010) <sup>12</sup>                                                                 | L981P | -       | -  |
| 182                          | SCN1A  | V983A | LoF | Rhodes (2005) <sup>130</sup>                                     | EPI                        | Fujiwara (2003) <sup>131</sup>                                                                  | V983A | -       | -  |
| 183                          | SCN1A  | N985I | LoF | Sugawara (2003) <sup>184</sup>                                   | EPI                        | Fujiwara (2003) <sup>131</sup>                                                                  | N985I | -       | -  |
| 184                          | SCN1A  | L986F | LoF | Lossin (2003) <sup>186</sup><br>Thompson (2012) <sup>187</sup>   | EPI                        | Claes (2001) <sup>188</sup>                                                                     | L986F | -       | -  |
| 185                          | SCN4A  | L796V | GoF | Elia (2020) <sup>189</sup>                                       | PMC                        | Elia (2020) <sup>189</sup>                                                                      | L986V | -       | -  |
| <b>992-1219 Cytoplasmic</b>  |        |       |     |                                                                  |                            |                                                                                                 |       |         |    |
| 186                          | SCN5A  | S941N | GoF | Ruan (2007) <sup>190</sup>                                       | LQT3                       | Schwarz (2000) <sup>191</sup>                                                                   | S994N | -       | -  |
| 187                          | SCN11A | N816K | GoF | Huang (2019) <sup>192</sup>                                      | FEP                        | Huang (2019) <sup>192</sup>                                                                     | A997K | 3.99e-6 | NC |

|                                |        |        |       |                                                                                                                                                                                          |           |                                                                                                                                                                                                                                          |        |         |    |
|--------------------------------|--------|--------|-------|------------------------------------------------------------------------------------------------------------------------------------------------------------------------------------------|-----------|------------------------------------------------------------------------------------------------------------------------------------------------------------------------------------------------------------------------------------------|--------|---------|----|
| 188                            | SCN2A  | E999K  | GoF   | Miao (2020) <sup>193</sup><br>Thompson (2020) <sup>54</sup>                                                                                                                              | EPI       | Nakamura (2013) <sup>55</sup><br>Miao (2020) <sup>193</sup>                                                                                                                                                                              | E1008K | -       | NC |
| 189                            | SCN1A  | N1011I | LoF   | Rhodes (2005) <sup>130</sup>                                                                                                                                                             | EPI       | Fujiwara (2003) <sup>131</sup><br>[compound missense with<br>T808S]                                                                                                                                                                      | N1011I | -       | NC |
| 190                            | SCN5A  | R965C  | LoF   | Hsueh (2009) <sup>194</sup>                                                                                                                                                              | BrS       | Hsueh (2009) <sup>194</sup>                                                                                                                                                                                                              | R1018C | 6.49e-5 | -  |
| 191                            | SCN5A  | P1014S | STW   | Glazer (2020) <sup>1</sup>                                                                                                                                                               | BrS       | Glazer (2020) <sup>1</sup>                                                                                                                                                                                                               | H1065S | -       | NC |
| 192                            | SCN5A  | R1023H | LoF   | Frustaci (2005) <sup>87</sup>                                                                                                                                                            | BrS       | Frustaci (2005) <sup>87</sup>                                                                                                                                                                                                            | L1073H | 2.50-e4 | NC |
| 193                            | SCN10A | P1102S | GoF   | Gando (2020) <sup>91</sup>                                                                                                                                                               | SUD       | Gando (2020) <sup>91</sup>                                                                                                                                                                                                               | P1167S | 4.02e-6 | NC |
| 194                            | SCN5A  | S1103Y | GoF   | Splawski (2002) <sup>195</sup>                                                                                                                                                           | LQT3      | Splawski (2002) <sup>195</sup><br>- reported as S1102Y<br>Plant (2006) <sup>196</sup>                                                                                                                                                    | -      | 7.69e-3 | NC |
| 195                            | SCN1A  | T1174S | Mixed | Cestele (2013) <sup>197</sup>                                                                                                                                                            | EPI       | Cestele (2013) <sup>197</sup>                                                                                                                                                                                                            | T1174S | 1.71e-3 | NC |
| 196                            | SCN9A  | W1150R | GoF   | Estacion (2009) <sup>198</sup>                                                                                                                                                           | IEM       | Drenth (2005) <sup>42</sup><br>Estacion (2009) <sup>198</sup>                                                                                                                                                                            | Q1187R | 0.88    | NC |
| 197                            | SCN5A  | P1177L | GoF   | Winkel (2012) <sup>199</sup>                                                                                                                                                             | LQT3      | Winkel (2012) <sup>199</sup>                                                                                                                                                                                                             | K1190L | -       | NC |
| 198                            | SCN1A  | W1204R | Mixed | Lossin (2002) <sup>153</sup><br>Bechi (2015) <sup>124</sup>                                                                                                                              | EPI       | Escayg (2001) <sup>200</sup><br>Marini (2007) <sup>201</sup>                                                                                                                                                                             | W1204R | -       | NC |
| 199                            | SCN5A  | R1193Q | LoF   | Wang (2004) <sup>202</sup><br>Huang (2006) <sup>203</sup><br>Abdelsayed<br>(2015) <sup>204</sup><br>Peters (2016) <sup>88</sup><br>Abe (2018) <sup>205</sup><br>Li (2019) <sup>206</sup> | LQT3; BrS | Takahata (2003) <sup>207</sup><br>Wang (2004) <sup>202</sup><br>Huang (2006) <sup>203</sup><br>Li (2019) <sup>206</sup>                                                                                                                  | N1206Q | 5.18-e3 | NC |
| <b>1220-1237 S1 of D3</b>      |        |        |       |                                                                                                                                                                                          |           |                                                                                                                                                                                                                                          |        |         |    |
| 200                            | SCN2A  | E1211K | Mixed | Ogiwara (2009) <sup>208</sup>                                                                                                                                                            | EPI       | Ogiwara (2009) <sup>208</sup>                                                                                                                                                                                                            | E1221K | -       | -  |
| 201                            | SCN5A  | S1218I | LoF   | Calloe (2013) <sup>114</sup>                                                                                                                                                             | BrS       | Calloe (2013) <sup>114</sup>                                                                                                                                                                                                             | S1231I | -       | -  |
| <b>1238-1250 Extracellular</b> |        |        |       |                                                                                                                                                                                          |           |                                                                                                                                                                                                                                          |        |         |    |
| 202                            | SCN5A  | E1225K | LoF   | Glazer (2020) <sup>1</sup>                                                                                                                                                               | LQT3; BrS | Schulze-Bahr (2003) <sup>209</sup><br>Tester (2005) <sup>6</sup><br>Crotti (2012) <sup>210</sup><br>Sommariva (2013) <sup>68</sup><br>Andorin (2016) <sup>71</sup><br>Yamagata (2017) <sup>21</sup><br>Van Malderen (2017) <sup>74</sup> | E1238K | 4.01e-6 | -  |
| 203                            | SCN5A  | R1232W | LoF   | Baroudi (2002) <sup>211</sup><br>Makita (2008) <sup>212</sup>                                                                                                                            | BrS       | Chen (1998) <sup>213</sup><br>Baroudi (2002) <sup>211</sup>                                                                                                                                                                              | R1245W | -       | NC |
| <b>1251-1269 S2 of D3</b>      |        |        |       |                                                                                                                                                                                          |           |                                                                                                                                                                                                                                          |        |         |    |

|                                |        |        |           |                                                                                                |      |                                                                                                            |        |         |    |
|--------------------------------|--------|--------|-----------|------------------------------------------------------------------------------------------------|------|------------------------------------------------------------------------------------------------------------|--------|---------|----|
| 204                            | SCN4A  | D1069N | LoF/Mixed | Zaharieva (2016) <sup>14</sup>                                                                 | CMS  | Zaharieva (2016) <sup>14</sup>                                                                             | D1256N | 1.20e-5 | -  |
| 205                            | SCN5A  | D1243N | LoF/Mixed | Glazer (2020) <sup>1</sup>                                                                     | BrS  | Kapplinger (2010) <sup>12</sup>                                                                            |        | 1.45e-4 | -  |
| 206                            | SCN1A  | M1267I | LoF       | Nissenkorn (2019) <sup>29</sup>                                                                | EPI  | Nissenkorn (2019) <sup>29</sup>                                                                            | M1267I | -       | -  |
| <b>1270-1283 Cytoplasmic</b>   |        |        |           |                                                                                                |      |                                                                                                            |        |         | -  |
| 207                            | SCN1A  | A1273V | Mixed     | Peters (2016) <sup>214</sup>                                                                   | EPI  | Peters (2016) <sup>214</sup>                                                                               | A1273V | -       | -  |
| 208                            | SCN5A  | G1262S | LoF       | Glazer (2020) <sup>1</sup>                                                                     | BrS  | Kapplinger (2010) <sup>12</sup>                                                                            | G1275S | 2.83e-5 | -  |
| <b>1284-1302 S3 of D3</b>      |        |        |           |                                                                                                |      |                                                                                                            |        |         |    |
| 209                            | SCN3A  | V1280I | STW       | Zaman (2020) <sup>147</sup>                                                                    | EPI  | Zaman (2020) <sup>147</sup>                                                                                | V1292I | 1.2e-5  | NC |
| 210                            | SCN5A  | V1281F | Mixed     | Glazer (2020) <sup>1</sup>                                                                     | BrS  | Hermida (2013) <sup>215</sup>                                                                              | V1294F | -       | -  |
| <b>1303-1310 Extracellular</b> |        |        |           |                                                                                                |      |                                                                                                            |        |         |    |
| 211                            | SCN5A  | A1294G | LoF       | Zaytseva (2019) <sup>216</sup>                                                                 | BrS  | Zaytseva (2019) <sup>216</sup>                                                                             | S1307G | 2.86e-5 | NC |
| 212                            | SCN5A  | E1295K | GoF       | Abriel (2001) <sup>217</sup>                                                                   | LQT3 | Abriel (2001) <sup>217</sup>                                                                               | E1308K | 4.02e-6 | NC |
| <b>1311-1329 S4 of D3</b>      |        |        |           |                                                                                                |      |                                                                                                            |        |         |    |
| 213                            | SCN9A  | R1279P | GoF       | Huang (2014) <sup>218</sup>                                                                    | PPN  | Huang (2014) <sup>218</sup>                                                                                | R1316P | -       | -  |
| 214                            | SCN5A  | T1304M | GoF       | Wang (2007) <sup>36</sup>                                                                      | LQT3 | Wang (2007) <sup>36</sup><br>Kapplinger (2009) <sup>19</sup><br>Olesen (2012) <sup>219</sup>               | T1317M | 1.65e-4 | -  |
| 215                            | SCN5A  | L1308F | STW       | Barajaz-Martinez (2008) <sup>51</sup>                                                          | BrS  | Barajaz-Martinez (2008) <sup>51</sup><br>Kapplinger (2010) <sup>12</sup><br>[compound missense with V232I] | L1321F | 4.71e-4 | NC |
| 216                            | SCN2A  | R1312T | LoF       | Lossin (2012) <sup>220</sup>                                                                   | EPI  | Shi (2009) <sup>221</sup>                                                                                  | R1322T | -       | -  |
| 217                            | SCN11A | L1158P | GoF       | Huang (2014) <sup>90</sup>                                                                     | SFN  | Huang (2014) <sup>90</sup>                                                                                 | L1327P | 4.71e-4 | -  |
| 218                            | SCN2A  | R1319Q | LoF       | Misra (2008) <sup>222</sup>                                                                    | EPI  | Berkovic (2004) <sup>223</sup><br>Wolff (2017) <sup>96</sup>                                               | R1329Q | -       | NC |
| <b>1330-1346 Cytoplasmic</b>   |        |        |           |                                                                                                |      |                                                                                                            |        |         |    |
| 219                            | SCN5A  | G1319V | LoF       | Casini (2007) <sup>224</sup>                                                                   | BrS  | Casini (2007) <sup>224</sup>                                                                               | G1332V | 4.08e-5 | -  |
| 220                            | SCN9A  | V1298F | GoF       | Jarecki (2008) <sup>225</sup><br>Cheng (2010) <sup>226</sup><br>Estacion (2010) <sup>167</sup> | PEPD | Fertleman (2006) <sup>227</sup>                                                                            | V1335F | -       | -  |



|                           |        |        |       |                                                                                                                    |                 |                                                                                                                                                                    |        |         |    |
|---------------------------|--------|--------|-------|--------------------------------------------------------------------------------------------------------------------|-----------------|--------------------------------------------------------------------------------------------------------------------------------------------------------------------|--------|---------|----|
| 221                       | SCN9A  | V1299F | GoF   | Jarecki (2008) <sup>225</sup><br>Thiele (2011) <sup>159</sup>                                                      | PEPD            | Fertleman (2006) <sup>227</sup>                                                                                                                                    | V1336F | -       | -  |
| 222                       | SCN5A  | N1325S | GoF   | Wang (1996) <sup>228</sup><br>Tian (2004) <sup>229</sup><br>Glazer (2020) <sup>1</sup><br>Li (2020) <sup>230</sup> | LQT3            | Wang (1995) <sup>231</sup>                                                                                                                                         | N1338S | -       | NC |
| 223                       | SCN2A  | L1330F | LoF   | Misra (2008) <sup>222</sup>                                                                                        | EPI             | Heron (2002) <sup>232</sup>                                                                                                                                        | L1340F | -       | -  |
| 224                       | SCN5A  | V1328M | GoF   | Turker (2016) <sup>233</sup>                                                                                       | BrS             | Turker (2016) <sup>233</sup>                                                                                                                                       | L1341M | -       | NC |
| 225                       | SCN5A  | A1330P | GoF   | Wedekind (2001) <sup>234</sup><br>Berecki (2006) <sup>235</sup>                                                    | LQT3            | Wedekind (2001) <sup>234</sup>                                                                                                                                     | A1343P | -       | -  |
| 226                       | SCN4A  | A1156T | GoF   | Palmio (2017) <sup>236</sup>                                                                                       | HyperPP;<br>PMC | McClatchey (1992) <sup>237</sup>                                                                                                                                   | A1343T | 5.33e-5 | -  |
| 227                       | SCN5A  | A1330T | GoF   | Smits (2005b) <sup>238</sup>                                                                                       | LQT3            | Smits (2005b) <sup>238</sup>                                                                                                                                       |        | -       | -  |
| 228                       | SCN3A  | P1333L | GoF   | Zaman (2018) <sup>155</sup><br>Zaman (2020) <sup>147</sup>                                                         | EPI             | Zaman (2018) <sup>155</sup>                                                                                                                                        | P1345L | -       | -  |
| 229                       | SCN4A  | P1158L | GoF   | Desaphy (2016) <sup>239</sup>                                                                                      | PAM             | Desaphy (2016) <sup>239</sup>                                                                                                                                      |        | -       | -  |
| 230                       | SCN5A  | P1332L | GoF   | Ruan (2007) <sup>190</sup>                                                                                         | LQT3            | Ruan (2007) <sup>190</sup><br>Schulze-Bahr (2004) <sup>240</sup>                                                                                                   |        | -       | -  |
| 231                       | SCN9A  | P1308L | GoF   | Cheng (2010) <sup>226</sup>                                                                                        | IEM             | Cheng (2010) <sup>226</sup>                                                                                                                                        |        | -       | -  |
| 232                       | SCN4A  | P1158S | Mixed | Sugiara (2003) <sup>241</sup><br>Webb (2008) <sup>242</sup>                                                        | HypoPP          | Sugiara (2003) <sup>241</sup>                                                                                                                                      | P1345S | -       | -  |
| 233                       | SCN5A  | S1333Y | GoF   | Huang (2009) <sup>243</sup>                                                                                        | LQT3            | Huang (2009) <sup>243</sup>                                                                                                                                        | S1346Y | -       | NC |
| 234                       | SCN2A  | S1336Y | GoF   | Thompson (2020) <sup>54</sup>                                                                                      | EPI             | Nakamura (2013) <sup>55</sup>                                                                                                                                      |        | -       | NC |
| <b>1347-1366 S5 of D3</b> |        |        |       |                                                                                                                    |                 |                                                                                                                                                                    |        |         |    |
| 235                       | SCN8A  | I1327V | GoF   | Barker (2016) <sup>244</sup>                                                                                       | EPI             | Vaher (2014) <sup>245</sup><br>Singh (2015) <sup>246</sup>                                                                                                         | I1347V | -       | -  |
| 236                       | SCN2A  | N1339D | GoF   | Miao (2020) <sup>193</sup>                                                                                         | EPI             | Miao (2020) <sup>193</sup>                                                                                                                                         | N1349D | -       | -  |
| 237                       | SCN8A  | L1331V | GoF   | Patel (2016) <sup>247</sup>                                                                                        | EPI             | Carvill (2013) <sup>248</sup><br>- reported as L1290V                                                                                                              | L1351V | -       | -  |
| 238                       | SCN2A  | L1342P | Mixed | Begemann (2019) <sup>180</sup>                                                                                     | EPI             | Hackenberg (2014) <sup>249</sup><br>Matalon (2014) <sup>250</sup><br>Dimassi (2016) <sup>251</sup><br>Wolff (2017) <sup>96</sup><br>Begemann (2019) <sup>180</sup> | L1352P | -       | -  |
| 239                       | SCN9A  | V1316A | GoF   | Wu (2013) <sup>252</sup><br>Estacion (2013) <sup>253</sup>                                                         | IEM             | Huang (2016) <sup>254</sup><br>Estacion (2013) <sup>253</sup>                                                                                                      | V1353A | -       | -  |
| 240                       | SCN11A | V1184A | GoF   | Leipold (2015) <sup>255</sup>                                                                                      | PPN             | Leipold (2015) <sup>255</sup>                                                                                                                                      |        | -       | -  |

|                                |        |        |     |                                |                            |                                                                                                    |        |         |    |
|--------------------------------|--------|--------|-----|--------------------------------|----------------------------|----------------------------------------------------------------------------------------------------|--------|---------|----|
| 241                            | SCN5A  | V1340I | LoF | Samani (2009) <sup>256</sup>   | BrS                        | Samani (2009) <sup>256</sup>                                                                       | V1353I | 4.60e-5 | -  |
| 242                            | SCN1A  | V1353L | LoF | Lossin (2003) <sup>186</sup>   | EPI                        | Wallace (2001) <sup>257</sup>                                                                      | V1353L | -       | -  |
| 243                            | SCN5A  | F1344S | LoF | Keller (2006) <sup>258</sup>   | BrS                        | Keller (2006) <sup>258</sup>                                                                       | F1357S | -       | -  |
| 244                            | SCN5A  | W1345C | LoF | Glazer (2020) <sup>1</sup>     | BrS                        | Lee (2010) <sup>259</sup>                                                                          | W1358C | -       | -  |
| 245                            | SCN5A  | L1346P | LoF | Glazer (2020) <sup>1</sup>     | BrS                        | Kapplinger (2010) <sup>12</sup>                                                                    | L1359P | -       | -  |
| 246                            | SCN1A  | V1366I | LoF | Bechi (2015) <sup>124</sup>    | EPI                        | Osaka (2007) <sup>260</sup>                                                                        | V1366I | -       | -  |
| 247                            | SCN5A  | V1353M | STW | Glazer (2020) <sup>1</sup>     | BrS                        | Kapplinger (2010) <sup>12</sup>                                                                    | V1366M | 2.78e-5 | NC |
| <b>1367-1418 Extracellular</b> |        |        |     |                                |                            |                                                                                                    |        |         |    |
| 248                            | SCN10A | A1304T | GoF | Faber (2012) <sup>111</sup>    | PPN                        | Faber (2012) <sup>111</sup>                                                                        | A1370T | 4.60e-5 | NC |
| 249                            | SCN8A  | T1360N | LoF | Wengert (2019) <sup>65</sup>   | NDD<br>without<br>epilepsy | Wengert (2019) <sup>65</sup>                                                                       | T1380N | -       | -  |
| 250                            | SCN5A  | V1378M | LoF | Moreau (2012) <sup>18</sup>    | BrS                        | Moreau (2012) <sup>18</sup>                                                                        | V1390M | 3.99e-6 | NC |
| 251                            | SCN5A  | N1380K | LoF | Glazer (2020) <sup>1</sup>     | BrS                        | Rudnik-Schöneborn<br>(2011) <sup>261</sup>                                                         | N1392K | -       | -  |
| 252                            | SCN5A  | S1382I | LoF | Glazer (2020) <sup>1</sup>     | BrS                        | Probst (2009) <sup>128</sup>                                                                       | T1394I | -       | NC |
| 253                            | SCN4A  | C1209F | LoF | Zaharieva (2016) <sup>14</sup> | CMS                        | Zaharieva (2016) <sup>14</sup>                                                                     | C1396F | -       | -  |
| 254                            | SCN2A  | C1386R | LoF | Ben-Shalom (2017) <sup>5</sup> | ASD                        | Ben-Shalom (2017) <sup>5</sup>                                                                     | C1396R | -       | -  |
| 255                            | SCN5A  | V1405L | LoF | Glazer (2020) <sup>1</sup>     | BrS                        | Amin (2011) <sup>82</sup>                                                                          | V1418L | -       | -  |
| 256                            | SCN5A  | V1405M | LoF | Glazer (2020) <sup>1</sup>     | BrS                        | Kapplinger (2010) <sup>12</sup><br>Zumhagen (2016) <sup>262</sup><br>Yamagata (2017) <sup>21</sup> | V1418M | -       | -  |
| <b>1419-1440 Pore-forming</b>  |        |        |     |                                |                            |                                                                                                    |        |         |    |
| 257                            | SCN5A  | G1406E | LoF | Glazer (2020) <sup>1</sup>     | BrS                        | Kapplinger (2010) <sup>12</sup>                                                                    | G1419E | -       | NC |
| 258                            | SCN5A  | G1406R | LoF | Tan (2006) <sup>263</sup>      | BrS                        | Kyndt (2001) <sup>264</sup>                                                                        | G1419R | -       | NC |
| 259                            | SCN1A  | G1421W | LoF | Kim (2018) <sup>265</sup>      | EPI                        | Kim (2018) <sup>265</sup>                                                                          | G1421W | -       | NC |
| 260                            | SCN2A  | T1420M | LoF | Ben-Shalom (2017) <sup>5</sup> | ASD                        | Ben-Shalom (2017) <sup>5</sup>                                                                     | T1430M | -       | -  |

|                                |       |        |       |                                                                    |      |                                                                                                     |        |         |    |
|--------------------------------|-------|--------|-------|--------------------------------------------------------------------|------|-----------------------------------------------------------------------------------------------------|--------|---------|----|
| 261                            | SCN5A | G1420R | LoF   | Glazer (2020) <sup>1</sup>                                         | BrS  | Kapplinger (2010) <sup>12</sup>                                                                     | G1433R | -       | -  |
| 262                            | SCN5A | G1420V | LoF   | Glazer (2020) <sup>1</sup>                                         | BrS  | Hermida (2010) <sup>266</sup>                                                                       | G1433V | -       | -  |
| <b>1441-1457 Extracellular</b> |       |        |       |                                                                    |      |                                                                                                     |        |         |    |
| 263                            | SCN5A | A1428S | LoF   | Zhu (2015) <sup>267</sup>                                          | BrS  | Zhu (2015) <sup>267</sup>                                                                           | A1441S | 3.19e-5 | -  |
| 264                            | SCN5A | A1428V | LoF   | Glazer (2020) <sup>1</sup>                                         | BrS  | Kapplinger (2010) <sup>12</sup><br>Van Malderen (2017) <sup>74</sup>                                | A1441V | -       | -  |
| 265                            | SCN5A | D1430N | LoF   | Maury (2013) <sup>268</sup>                                        | BrS  | Maury (2013) <sup>268</sup>                                                                         | D1443N | -       | -  |
| 266                            | SCN5A | R1432G | LoF   | Deschenes (2000) <sup>269</sup><br>Glazer (2020) <sup>1</sup>      | BrS  | Deschenes (2000) <sup>269</sup>                                                                     | R1445G | -       | NC |
| <b>1458-1479 S6 of D3</b>      |       |        |       |                                                                    |      |                                                                                                     |        |         |    |
| 267                            | SCN5A | Y1449C | LoF   | Glazer (2020) <sup>1</sup>                                         | BrS  | Kapplinger (2010) <sup>12</sup><br>Hothi (2015) <sup>270</sup><br>Van Malderen (2017) <sup>74</sup> | Y1462C | -       | -  |
| 268                            | SCN5A | T1461S | LoF   | Glazer (2020) <sup>1</sup>                                         | BrS  | Sacilotto (2017) <sup>271</sup>                                                                     | T1474S | -       | -  |
| <b>1480-1542 Cytoplasmic</b>   |       |        |       |                                                                    |      |                                                                                                     |        |         |    |
| 269                            | SCN4A | V1293I | GoF   | Farinato (2019) <sup>272</sup>                                     | PMC  | Koch (1995) <sup>273</sup>                                                                          | V1481I | -       | -  |
| 270                            | SCN2A | I1473M | GoF   | Ogiwara (2009) <sup>208</sup>                                      | EPI  | Ogiwara (2009) <sup>208</sup>                                                                       | I1483M | -       | -  |
| 271                            | SCN3A | I1468R | Mixed | Zaman (2020) <sup>147</sup>                                        | EPI  | Zaman (2020) <sup>147</sup>                                                                         | I1483R | -       | -  |
| 272                            | SCN4A | N1297K | GoF   | Farinato (2019) <sup>272</sup>                                     | PMC  | Farinato (2019) <sup>272</sup><br>Gay (2008) <sup>274</sup>                                         | N1485K | -       | -  |
| 273                            | SCN4A | N1297S | GoF   | Maggi (2017) <sup>275</sup><br>Farinato (2019) <sup>272</sup>      | PMC  | Maggi (2017) <sup>275</sup>                                                                         | N1485S | -       | -  |
| 274                            | SCN4A | F1298C | GoF   | Farinato (2019) <sup>272</sup>                                     | PAM  | Farinato (2019) <sup>272</sup>                                                                      | F1486C | -       | -  |
| 275                            | SCN5A | F1473C | GoF   | Bankston (2007) <sup>276</sup>                                     | LQT3 | Bankston (2007) <sup>276</sup>                                                                      |        | -       | -  |
| 276                            | SCN5A | F1473S | GoF   | Cai (2016) <sup>277</sup>                                          | LQT3 | Ruan (2010) <sup>278</sup>                                                                          | F1486S | -       | -  |
| 277                            | SCN9A | F1449V | GoF   | Dib-Hajj (2005) <sup>279</sup><br>Gurkiewicz (2011) <sup>280</sup> | IEM  | Dib-Hajj (2005) <sup>279</sup>                                                                      | F1486V | -       | -  |
| 278                            | SCN5A | Q1475P | GoF   | Gando (2020b) <sup>281</sup>                                       | LQT3 | Tan (2017) <sup>282</sup>                                                                           | Q1488P | -       | -  |
| 279                            | SCN1A | Q1489H | GoF   | Barbieri (2019) <sup>283</sup>                                     | FHM  | Vahedi (2009) <sup>284</sup>                                                                        | Q1489H | -       | -  |

|                           |       |        |     |                                                                 |         |                                                                                                                                                                                        |        |         |   |
|---------------------------|-------|--------|-----|-----------------------------------------------------------------|---------|----------------------------------------------------------------------------------------------------------------------------------------------------------------------------------------|--------|---------|---|
| 280                       | SCN1A | Q1489K | GoF | Kahlig (2008) <sup>64</sup><br>Cestèle (2008) <sup>285</sup>    | FHM     | Kahlig (2008) <sup>64</sup><br>Cestèle (2008) <sup>285</sup>                                                                                                                           | Q1489K | -       | - |
| 281                       | SCN5A | Q1476R | GoF | Moreau (2013) <sup>286</sup>                                    | LQT3    | Moreau (2013) <sup>286</sup>                                                                                                                                                           | Q1489R | -       | - |
| 282                       | SCN4A | G1306E | GoF | Farinato (2019) <sup>272</sup>                                  | PAM     | Lerche (1993) <sup>287</sup>                                                                                                                                                           | G1494E | -       | - |
| 283                       | SCN8A | G1475R | GoF | Liu (2019) <sup>288</sup><br>Zaman (2019) <sup>22</sup>         | EPI     | Parrini (2017) <sup>289</sup><br>Wang (2017) <sup>290</sup><br>Xiao (2018) <sup>291</sup><br>Gardella (2018) <sup>292</sup><br>Liu (2019) <sup>288</sup><br>Zaman (2019) <sup>22</sup> | G1494R | -       | - |
| 284                       | SCN1A | I1498M | LoF | Barbieri (2019) <sup>283</sup>                                  | FHM     | Weller (2014) <sup>293</sup>                                                                                                                                                           | I1498M | -       | - |
| 285                       | SCN4A | I1310N | GoF | Farinato (2019) <sup>272</sup>                                  | PMC     | Farinato (2019) <sup>272</sup>                                                                                                                                                         | I1498N | -       | - |
| 286                       | SCN9A | I1461T | GoF | Fertleman (2006) <sup>227</sup>                                 | PEPD    | Fertleman (2006) <sup>227</sup>                                                                                                                                                        | I1498T | -       | - |
| 287                       | SCN5A | F1486L | GoF | Wang (2007) <sup>36</sup>                                       | LQT3    | Wang (2007) <sup>36</sup>                                                                                                                                                              | F1499L | -       | - |
| 288                       | SCN1A | F1499L | GoF | Barbieri (2019) <sup>283</sup>                                  | FHM     | Vahedi (2009) <sup>284</sup>                                                                                                                                                           |        | -       | - |
| 289                       | SCN1A | M1500V | GoF | Barbieri (2019) <sup>283</sup>                                  | FHM     | Domitrz (2016) <sup>294</sup>                                                                                                                                                          | M1500V | -       | - |
| 290                       | SCN4A | T1313A | GoF | Bouhours (2004) <sup>295</sup>                                  | PMC     | Bouhours (2004) <sup>295</sup>                                                                                                                                                         | T1501A | -       | - |
| 291                       | SCN4A | T1313M | GoF | Farinato (2019) <sup>272</sup>                                  | PMC     | Farinato (2019) <sup>272</sup>                                                                                                                                                         | T1501M | 4.00e-6 | - |
| 292                       | SCN9A | T1464I | GoF | Fertleman (2006) <sup>227</sup><br>Thiele (2011) <sup>159</sup> | PEPD    | Fertleman (2006) <sup>227</sup>                                                                                                                                                        | T1501I | -       | - |
| 293                       | SCN3A | T1486I | GoF | Zaman (2020) <sup>147</sup>                                     | EPI/PMG | Zaman (2020) <sup>147</sup>                                                                                                                                                            |        | -       | - |
| 294                       | SCN8A | A1491V | GoF | Zaman (2019) <sup>22</sup>                                      | EPI     | Zaman (2019) <sup>22</sup>                                                                                                                                                             | A1510V | -       | - |
| 295                       | SCN5A | P1506S | LoF | Saber (2015) <sup>296</sup>                                     | BrS     | Saber (2015) <sup>296</sup>                                                                                                                                                            | P1519S | -       | - |
| 296                       | SCN5A | R1512W | LoF | Deschenes (2000) <sup>269</sup><br>Zheng (2016) <sup>297</sup>  | BrS     | Deschenes (2000) <sup>269</sup><br>Smits (2002) <sup>127</sup><br>Zheng (2016) <sup>297</sup>                                                                                          | R1525W | 5.57e-5 | - |
| 297                       | SCN1A | R1525Q | LoF | Binini (2017) <sup>72</sup>                                     | EPI     | Binini (2017) <sup>72</sup>                                                                                                                                                            | R1525Q | 3.99e-6 | - |
| <b>1543-1560 S1 of D4</b> |       |        |     |                                                                 |         |                                                                                                                                                                                        |        |         |   |
| 298                       | SCN5A | N1541D | LoF | Dharmawan (2019) <sup>298</sup>                                 | BrS     | Dharmawan (2019) <sup>298</sup>                                                                                                                                                        | N1554D | -       | - |
| 299                       | SCN4A | N1366S | GoF | Ke (2017) <sup>299</sup>                                        | PMC     | Ke (2017) <sup>299</sup>                                                                                                                                                               | N1554S | -       | - |

| 1561-1571 Extracellular |        |        |       |                                                                                                |           |                                                                                             |        |         |    |
|-------------------------|--------|--------|-------|------------------------------------------------------------------------------------------------|-----------|---------------------------------------------------------------------------------------------|--------|---------|----|
| 1572-1590 S2 of D4      |        |        |       |                                                                                                |           |                                                                                             |        |         |    |
| 300                     | SCN2A  | L1563V | Mixed | Misra (2008) <sup>222</sup><br>Berecki (2018) <sup>141</sup><br>Begemann (2019) <sup>180</sup> | EPI       | Lewis (1996) <sup>300</sup><br>Heron (2002) <sup>232</sup>                                  | L1573V | -       | -  |
| 301                     | SCN9A  | W1538R | GoF   | Cregg (2013) <sup>301</sup>                                                                    | IEM       | Cregg (2013) <sup>301</sup>                                                                 | R1575R | 2.02e-3 | NC |
| 302                     | SCN1A  | R1575C | GoF   | Ohmori (2008) <sup>302</sup>                                                                   | EPI       | Ohmori (2008) <sup>302</sup>                                                                | R1575C | 7.18e-5 | NC |
| 303                     | SCN2A  | I1571T | GoF   | Miao (2020) <sup>193</sup>                                                                     | EPI       | Miao (2020) <sup>193</sup>                                                                  | I1581T | -       | NC |
| 304                     | SCN10A | V1518I | LoF   | Gando (2020) <sup>91</sup>                                                                     | SUD       | Gando (2020) <sup>91</sup>                                                                  | L1583I | 7.78e-5 | NC |
| 305                     | SCN1A  | E1587K | LoF   | Kluckova (2020) <sup>10</sup>                                                                  | EPI       | Kluckova (2020) <sup>10</sup>                                                               | E1587K | -       | -  |
| 306                     | SCN5A  | E1574K | LoF   | Glazer (2020) <sup>1</sup>                                                                     | BrS       | Kapplinger (2010) <sup>12</sup>                                                             |        | -       | -  |
| 1591-1602 Cytoplasmic   |        |        |       |                                                                                                |           |                                                                                             |        |         |    |
| 307                     | SCN1A  | R1596C | LoF   | Kluckova (2020) <sup>10</sup>                                                                  | EPI       | Harkin (2007) <sup>303</sup><br>Depienne (2009) <sup>137</sup><br>Kim (2014) <sup>304</sup> | R1596C | -       | -  |
| 308                     | SCN5A  | R1583C | LoF   | Glazer (2020) <sup>1</sup>                                                                     | BrS       | Kapplinger (2010) <sup>12</sup>                                                             |        | 8.03e-6 | -  |
| 309                     | SCN2A  | Y1589C | GoF   | Lauxmann (2013) <sup>305</sup>                                                                 | EPI       | Lauxmann (2013) <sup>305</sup>                                                              | Y1599C | -       | -  |
| 1603-1620 S3 of D4      |        |        |       |                                                                                                |           |                                                                                             |        |         |    |
| 310                     | SCN5A  | I1593M | STW   | Kapplinger (2015) <sup>8</sup>                                                                 | LQT3      | Kapplinger (2015) <sup>8</sup>                                                              | I1606M | 4.02e-6 | NC |
| 311                     | SCN2A  | F1597L | GoF   | Wolff (2017) <sup>96</sup>                                                                     | EPI       | Wolff (2017) <sup>96</sup>                                                                  | F1607L | -       | -  |
| 312                     | SCN5A  | D1595N | LoF   | Wang (2002) <sup>306</sup>                                                                     | PCCD; BrS | Wang (2002) <sup>306</sup>                                                                  | D1608N | -       | -  |
| 313                     | SCN1A  | V1611F | GoF   | Rhodes (2005) <sup>130</sup>                                                                   | EPI       | Fujiwara (2003) <sup>131</sup>                                                              | V1611F | 4.03e-6 | -  |
| 1621-1633 Extracellular |        |        |       |                                                                                                |           |                                                                                             |        |         |    |
| 314                     | SCN5A  | S1609L | GoF   | Winkel (2015) <sup>103</sup>                                                                   | LQT3      | Winkel (2015) <sup>103</sup>                                                                | A1622L | -       | NC |
| 315                     | SCN1A  | L1624P | GoF   | Fan (2016) <sup>307</sup>                                                                      | FHM       | Fan (2016) <sup>307</sup>                                                                   | L1624P | -       | NC |
| 316                     | SCN4A  | V1442E | LoF   | Tsujino (2003) <sup>57</sup>                                                                   | CMS       | Tsujino (2003) <sup>57</sup>                                                                | V1630E | -       | NC |

|                           |       |        |       |                                                                                              |         |                                                                                          |        |         |   |
|---------------------------|-------|--------|-------|----------------------------------------------------------------------------------------------|---------|------------------------------------------------------------------------------------------|--------|---------|---|
| 317                       | SCN1A | P1632S | LoF   | Rhodes (2005) <sup>130</sup>                                                                 | EPI     | Fujiwara (2003) <sup>131</sup>                                                           | P1632S | -       | - |
| 318                       | SCN2A | P1622S | LoF   | Wolff (2017) <sup>96</sup>                                                                   | EPI     | Wolff (2017) <sup>96</sup>                                                               |        | -       | - |
| 319                       | SCN5A | T1620K | Mixed | Surber (2008) <sup>308</sup>                                                                 | LQT3    | Surber (2008) <sup>308</sup>                                                             | T1633K | -       | - |
| 320                       | SCN2A | T1623N | GoF   | Thompson (2020) <sup>54</sup>                                                                | EPI     | Nakamura (2013) <sup>55</sup>                                                            | T1633N | -       | - |
| 321                       | SCN5A | T1620M | LoF   | Baroudi (2002) <sup>211</sup><br>Wang (2000) <sup>309</sup><br>Makita (2008) <sup>212</sup>  | BrS     | Chen (1998) <sup>213</sup><br>Baroudi (2002) <sup>211</sup>                              | T1633M | 3.99e-6 | - |
| <b>1634-1650 S4 of D4</b> |       |        |       |                                                                                              |         |                                                                                          |        |         |   |
| 322                       | SCN3A | R1621G | GoF   | Zaman (2020) <sup>147</sup>                                                                  | EPI/PMG | Zaman (2020) <sup>147</sup>                                                              | R1636G | -       | - |
| 323                       | SCN3A | R1621Q | GoF   | Zaman (2020) <sup>147</sup>                                                                  | EPI/PMG | Zaman (2020) <sup>147</sup>                                                              | R1636Q | 3.98e-6 | - |
| 324                       | SCN5A | R1623Q | GoF   | Kambouris (1998) <sup>310</sup><br>Tsurugi (2009) <sup>311</sup><br>Li (2020) <sup>230</sup> | LQT3    | Kambouris (2000) <sup>312</sup><br>Miura (2003) <sup>313</sup>                           |        | -       | - |
| 325                       | SCN8A | R1617Q | GoF   | Wagnon (2015) <sup>314</sup>                                                                 | EPI     | Ohba (2014) <sup>315</sup><br>Kong (2015) <sup>316</sup><br>Larsen (2015) <sup>317</sup> |        | -       | - |
| 326                       | SCN4A | R1451C | LoF   | Poulin (2018) <sup>318</sup>                                                                 | HypoPP  | Poulin (2018) <sup>318</sup>                                                             | R1639C | 1.21e-5 | - |
| 327                       | SCN5A | R1626P | GoF   | Ruan (2007) <sup>190</sup>                                                                   | LQT3    | Ruan (2007) <sup>190</sup>                                                               | R1639P | -       | - |
| 328                       | SCN4A | R1451L | LoF   | Poulin (2018) <sup>318</sup>                                                                 | PMC     | Poulin (2018) <sup>318</sup>                                                             | R1639L | 4.04e-6 | - |
| 329                       | SCN8A | R1620L | LoF   | Liu (2019) <sup>288</sup>                                                                    | ASD     | Liu (2019) <sup>288</sup>                                                                |        | -       | - |
| 330                       | SCN8A | A1622D | GoF   | Liu (2019) <sup>288</sup>                                                                    | ASD     | Liu (2019) <sup>288</sup>                                                                | A1641D | -       | - |
| 331                       | SCN5A | R1629Q | LoF   | Zeng (2013) <sup>319</sup>                                                                   | BrS     | Zeng (2013) <sup>319</sup>                                                               | R1642Q | 1.19e-5 | - |
| 332                       | SCN4A | R1454W | LoF   | Habbout (2016) <sup>320</sup>                                                                | CMS     | Habbout (2016) <sup>320</sup>                                                            | R1642W | 1.61e-5 | - |
| 333                       | SCN4A | I1455T | Mixed | Bednarz (2016) <sup>321</sup>                                                                | PMC     | Bednarz (2016) <sup>321</sup>                                                            | I1643T | 1.20e-5 | - |
| 334                       | SCN5A | G1631D | GoF   | Wang (2008) <sup>322</sup>                                                                   | LQT3    | Wang (2008) <sup>322</sup>                                                               | G1644D | -       | - |
| 335                       | SCN9A | G1607R | GoF   | Choi (2011) <sup>323</sup>                                                                   | PEPD    | Choi (2011) <sup>323</sup>                                                               | G1644R | -       | - |
| 336                       | SCN5A | R1632C | LoF   | Nakajima (2015) <sup>324</sup><br>Dharmawan (2019) <sup>298</sup>                            | BrS     | Nakajima (2015) <sup>324</sup><br>García-Molina (2016) <sup>325</sup>                    | R1645C | 3.98e-6 | - |
| 337                       | SCN4A | R1457H | LoF   | Arnold (2015) <sup>326</sup>                                                                 | CMS     | Arnold (2015) <sup>326</sup>                                                             | R1645H | 4.01e-6 | - |

|                              |        |        |       |                                                                                                   |                            |                                                              |        |         |    |
|------------------------------|--------|--------|-------|---------------------------------------------------------------------------------------------------|----------------------------|--------------------------------------------------------------|--------|---------|----|
| 338                          | SCN5A  | R1632H | Mixed | Benson (2003) <sup>327</sup><br>Glazer (2020) <sup>1</sup>                                        | BrS                        | Robyns (2014) <sup>328</sup>                                 |        | 7.96e-6 | -  |
| 339                          | SCN1A  | R1648C | Mixed | Rhodes (2004) <sup>172</sup><br>Thompson (2012) <sup>187</sup>                                    | EPI                        | Ohmori (2002) <sup>173</sup> – reported<br>as R1638C         | R1648C | -       | -  |
| 340                          | SCN1A  | R1648H | Mixed | Lossin (2002) <sup>153</sup><br>Vanoye (2006) <sup>329</sup><br>Kahlig (2010) <sup>330</sup>      | EPI                        | Escayg (2000) <sup>154</sup>                                 | R1648H | -       | -  |
| 341                          | SCN4A  | R1460Q | Mixed | Elia (2019) <sup>331</sup>                                                                        | CMS                        | Elia (2019) <sup>331</sup>                                   | R1648Q | 8.01e-6 | -  |
| 342                          | SCN4A  | R1460W | Mixed | Elia (2019) <sup>331</sup>                                                                        | CMS                        | Elia (2019) <sup>331</sup>                                   | R1648W | 2.13e-5 | -  |
| 343                          | SCN9A  | L1612P | GoF   | Suter (2015) <sup>332</sup>                                                                       | PEPD                       | Suter (2015) <sup>332</sup>                                  | L1649P | -       | -  |
| 344                          | SCN1A  | L1649Q | Mixed | Kahlig (2008) <sup>64</sup><br>Cestèle (2013) <sup>333</sup>                                      | FHM                        | Kahlig (2008) <sup>64</sup><br>Cestèle (2013) <sup>333</sup> | L1649Q | -       | -  |
| <b>1651-1669 Cytoplasmic</b> |        |        |       |                                                                                                   |                            |                                                              |        |         |    |
| 345                          | SCN10A | R1588Q | LoF   | Jabbari (2015) <sup>13</sup>                                                                      | AF                         | Jabbari (2015) <sup>13</sup>                                 | K1651Q | 1.19e-5 | NC |
| 346                          | SCN5A  | G1642E | LoF   | Glazer (2020) <sup>1</sup>                                                                        | BrS                        | Kapplinger (2010) <sup>12</sup>                              | G1655E | -       | -  |
| 347                          | SCN1A  | I1656M | LoF   | Lossin (2003) <sup>186</sup><br>Liu (2013) <sup>334</sup>                                         | EPI                        | Wallace (2001) <sup>257</sup>                                | I1656M | -       | -  |
| 348                          | SCN1A  | R1657C | LoF   | Lossin (2003) <sup>186</sup>                                                                      | EPI                        | Lossin (2003) <sup>186</sup>                                 | R1657C | -       | -  |
| 349                          | SCN5A  | R1644C | LoF   | Frustaci (2005) <sup>87</sup>                                                                     | BrS                        | Frustaci (2005) <sup>87</sup>                                |        | 3.98e-6 | -  |
| 350                          | SCN8A  | R1638C | LoF   | Wengert (2019) <sup>65</sup>                                                                      | NDD<br>without<br>epilepsy | Wengert (2019) <sup>65</sup>                                 |        | -       | -  |
| 351                          | SCN5A  | R1644H | GoF   | Wang (1996) <sup>228</sup><br>Nieto-Marin<br>(2019) <sup>335</sup>                                | LQT3                       | Nieto-Marin (2019) <sup>335</sup>                            | R1657H | -       | -  |
| 352                          | SCN3A  | F1646C | GoF   | Zaman (2020) <sup>147</sup>                                                                       | EPI/PMG                    | Zaman (2020) <sup>147</sup>                                  | F1661C | -       | -  |
| 353                          | SCN1A  | F1661L | GoF   | Barbieri (2019) <sup>283</sup>                                                                    | FHM                        | Weller (2014) <sup>293</sup>                                 | F1661L | -       | -  |
| 354                          | SCN1A  | F1661S | Mixed | Rhodes (2004) <sup>172</sup><br>Thompson (2012) <sup>187</sup>                                    | EPI                        | Claes (2003) <sup>89</sup>                                   | F1661S | -       | -  |
| 355                          | SCN4A  | F1473S | GoF   | Fleischhauer<br>(1998) <sup>336</sup>                                                             | PMC                        | Fleischhauer (1998) <sup>336</sup>                           |        | -       | -  |
| 356                          | SCN1A  | M1664K | LoF   | Bechi (2015) <sup>124</sup>                                                                       | EPI                        | Depienne (2010) <sup>337</sup>                               | M1664K | -       | -  |
| 357                          | SCN9A  | M1627K | GoF   | Fertleman (2006) <sup>227</sup><br>Dib-Hajj (2008) <sup>338</sup><br>Thiele (2011) <sup>159</sup> | PEPD                       | Fertleman (2006) <sup>227</sup>                              |        | -       | -  |
| 358                          | SCN5A  | M1652R | GoF   | Ruan (2007) <sup>190</sup><br>Li (2020) <sup>230</sup>                                            | LQT3                       | Ruan (2007) <sup>190</sup>                                   | M1665R | -       | -  |

|                                |        |        |       |                                                                   |           |                                                                      |        |         |    |
|--------------------------------|--------|--------|-------|-------------------------------------------------------------------|-----------|----------------------------------------------------------------------|--------|---------|----|
| 359                            | SCN2A  | P1658S | LoF   | Miao (2020) <sup>193</sup>                                        | EPI       | Miao (2020) <sup>193</sup>                                           | P1668S |         | -  |
| 360                            | SCN5A  | A1656D | GoF   | Kim (2019) <sup>339</sup>                                         | LQT3      | Kim (2019) <sup>339</sup>                                            | A1669D | -       | -  |
| 361                            | SCN9A  | A1632E | GoF   | Estacion (2008) <sup>340</sup><br>Rühlmann (2020) <sup>341</sup>  | IEM; PEPD | Estacion (2008) <sup>340</sup>                                       | A1669E | -       | -  |
| 362                            | SCN9A  | A1632G | GoF   | Yang (2016) <sup>342</sup>                                        | IEM       | Yang (2016) <sup>342</sup>                                           | A1669G | -       | -  |
| 363                            | SCN9A  | A1632T | GoF   | Eberhardt (2014) <sup>343</sup>                                   | IEM       | Eberhardt (2014) <sup>343</sup>                                      | A1669T | -       | NC |
| <b>1670-1687 S5 of D4</b>      |        |        |       |                                                                   |           |                                                                      |        |         |    |
| 364                            | SCN1A  | L1670W | Mixed | Bertelli (2018) <sup>344</sup><br>Dhifallah (2018) <sup>345</sup> | FHM       | Dhifallah (2018) <sup>345</sup>                                      | L1670W | -       | -  |
| 365                            | SCN5A  | I1660V | LoF   | Cordeiro (2006) <sup>75</sup>                                     | BrS       | Cordeiro (2006) <sup>75</sup>                                        | I1673V | 3.18e-5 | -  |
| 366                            | SCN1A  | G1674R | LoF   | Rhodes (2004) <sup>172</sup><br>Thompson (2012) <sup>187</sup>    | EPI       | Ohmori (2002) <sup>173</sup><br>- reported as G1664R                 | G1674R | -       | -  |
| 367                            | SCN5A  | G1661R | LoF   | Glazer (2020) <sup>1</sup>                                        | BrS       | Kapplinger (2010) <sup>12</sup><br>Van Malderen (2017) <sup>74</sup> |        | -       | -  |
| 368                            | SCN5A  | V1667I | GoF   | Nakajima (2020) <sup>346</sup>                                    | LQT3      | Nakajima (2020) <sup>346</sup>                                       | V1680I | 3.98e-6 | NC |
| 369                            | SCN4A  | I1495F | Mixed | Bendahhou (1999) <sup>169</sup>                                   | HyperPP   | Bendahhou (1999) <sup>169</sup>                                      | I1683F | -       | -  |
| 370                            | SCN3A  | Y1669C | LoF   | Zaman (2020) <sup>147</sup>                                       | ASD       | Zaman (2020) <sup>147</sup>                                          | Y1684C | -       | NC |
| 371                            | SCN1A  | A1685D | LoF   | Sugiura (2012) <sup>347</sup>                                     | EPI       | Fujiwara (2003) <sup>131</sup>                                       | A1685D | -       | NC |
| 372                            | SCN1A  | A1685V | LoF   | Lossin (2003) <sup>186</sup><br>Sugiura (2012) <sup>347</sup>     | EPI       | Sugawara (2001) <sup>348</sup>                                       | A1685V | -       | NC |
| 373                            | SCN5A  | S1672Y | LoF   | Glazer (2020) <sup>1</sup>                                        | BrS       | Kapplinger (2010) <sup>12</sup><br>Andorin (2016) <sup>71</sup>      | A1685Y | -       | NC |
| <b>1688-1709 Extracellular</b> |        |        |       |                                                                   |           |                                                                      |        |         |    |
| 374                            | SCN5A  | A1680T | STW   | Glazer (2020) <sup>1</sup>                                        | BrS       | Kapplinger (2010) <sup>12</sup>                                      | A1693T | 4.6e-5  | NC |
| 375                            | SCN10A | D1639N | LoF   | Kaluza (2018) <sup>349</sup>                                      | SFN       | Dabby (2016) <sup>350</sup>                                          | D1702N | 8.75e-5 | NC |
| 376                            | SCN5A  | D1690N | LoF   | Zeng (2016) <sup>351</sup><br>Nunez (2013) <sup>352</sup>         | BrS       | Zeng (2016) <sup>351</sup><br>Nunez (2013) <sup>352</sup>            | D1703N | 3.98e-6 | -  |
| 377                            | SCN1A  | T1709I | LoF   | Rhodes (2005) <sup>130</sup>                                      | EPI       | Fujiwara (2003) <sup>131</sup>                                       | T1709I | -       | -  |
| <b>1710-1732 Pore-forming</b>  |        |        |       |                                                                   |           |                                                                      |        |         |    |



|                                |        |        |       |                                                            |           |                                                                        |        |         |    |
|--------------------------------|--------|--------|-------|------------------------------------------------------------|-----------|------------------------------------------------------------------------|--------|---------|----|
| 378                            | SCN5A  | T1709M | LoF   | Glazer (2020) <sup>1</sup>                                 | LQT3; BrS | Kapplinger (2010) <sup>12</sup><br>Lakshmanadoss (2016) <sup>353</sup> | T1722M | 3.98e-6 | -  |
| 379                            | SCN5A  | G1712C | LoF   | Chen (2016) <sup>354</sup>                                 | BrS       | Kapplinger (2015) <sup>8</sup><br>Chen (2016) <sup>354</sup>           | G1725C | -       | -  |
| 380                            | SCN10A | G1662S | GoF   | Han (2014) <sup>355</sup>                                  | SFN       | Han (2014) <sup>355</sup>                                              | G1725S | 1.36e-3 | -  |
| 381                            | SCN5A  | D1714G | LoF   | Amin (2005) <sup>356</sup>                                 | BrS       | Amin (2005) <sup>356</sup>                                             | D1727G | -       | -  |
| <b>1733-1762 Extracellular</b> |        |        |       |                                                            |           |                                                                        |        |         |    |
| 382                            | SCN5A  | N1722D | LoF   | Glazer (2020) <sup>1</sup>                                 | BrS       | Probst (2009) <sup>128</sup>                                           | N1735D | -       | NC |
| 383                            | SCN5A  | P1730H | LoF   | Glazer (2020) <sup>1</sup>                                 | BrS       | Van Malderen (2017) <sup>74</sup>                                      | P1743H | -       | NC |
| 384                            | SCN1A  | G1749E | LoF   | Rhodes (2004) <sup>172</sup>                               | EPI       | Claes (2003) <sup>89</sup>                                             | G1749E | -       | NC |
| 385                            | SCN5A  | G1740R | LoF   | Baroudi (2004) <sup>357</sup>                              | BrS       | Baroudi (2004) <sup>357</sup><br>Kapplinger (2010) <sup>12</sup>       | G1754R | -       | -  |
| 386                            | SCN5A  | G1743R | LoF   | Valdivia (2004) <sup>358</sup>                             | BrS       | Takahata (2003) <sup>207</sup><br>Valdivia (2004) <sup>358</sup>       | G1757R | -       | NC |
| 387                            | SCN5A  | G1748D | LoF   | Nunez (2013) <sup>352</sup>                                | BrS       | Nunez (2013) <sup>352</sup>                                            | G1762D | -       | NC |
| <b>1763-1785 S6 of D4</b>      |        |        |       |                                                            |           |                                                                        |        |         |    |
| 388                            | SCN1A  | F1765L | LoF   | Liao (2010b) <sup>182</sup>                                | EPI       | Liao (2010b) <sup>182</sup>                                            | F1765L | -       | NC |
| 389                            | SCN10A | I1706V | GoF   | Huang (2013) <sup>359</sup>                                | SFN       | Huang (2013) <sup>359</sup>                                            | I1770V | -       | -  |
| 390                            | SCN1A  | F1774S | GoF   | Bertelli (2018) <sup>344</sup>                             | FHM       | Chastan (2016) <sup>360</sup>                                          | F1774S | -       | -  |
| 391                            | SCN5A  | I1762A | GoF   | Chang (2004) <sup>361</sup>                                | LQT3      | Chang (2004) <sup>361</sup>                                            | V1776A | -       | NC |
| 392                            | SCN5A  | V1763M | GoF   | Chang (2004) <sup>361</sup>                                | LQT3      | Chang (2004) <sup>361</sup>                                            | V1777M | -       | NC |
| 393                            | SCN8A  | V1758A | LoF   | Zaman (2019) <sup>22</sup>                                 | EPI       | Zaman (2019) <sup>22</sup>                                             | V1778A | -       | -  |
| 394                            | SCN5A  | V1764M | GoF   | Chang (2004) <sup>361</sup>                                | LQT3      | Chang (2004) <sup>361</sup>                                            | V1778M | -       | -  |
| 395                            | SCN3A  | M1765I | GoF   | Zaman (2020) <sup>147</sup>                                | EPI/PMG   | Zaman (2020) <sup>147</sup>                                            | M1780I | -       | -  |
| 396                            | SCN8A  | M1760I | GoF   | Liu (2019) <sup>288</sup>                                  | EPI       | Liu (2019) <sup>288</sup>                                              |        | -       | -  |
| 397                            | SCN5A  | M1766L | Mixed | Valdivia (2002) <sup>362</sup><br>Ye (2003) <sup>106</sup> | LQT3      | Valdivia (2002) <sup>362</sup><br>Ye (2003) <sup>106</sup>             | M1780L | -       | -  |

|                              |       |        |       |                                                                                                                                                                                                                                            |           |                                                                                                      |        |         |    |
|------------------------------|-------|--------|-------|--------------------------------------------------------------------------------------------------------------------------------------------------------------------------------------------------------------------------------------------|-----------|------------------------------------------------------------------------------------------------------|--------|---------|----|
| 398                          | SCN5A | Y1767C | GoF   | Huang (2006) <sup>203</sup><br>Huang (2011) <sup>363</sup>                                                                                                                                                                                 | LQT3      | Huang (2011) <sup>363</sup>                                                                          | Y1781C | -       | -  |
| 399                          | SCN5A | I1768V | GoF   | Rivolta (2002) <sup>364</sup><br>Clancy (2003) <sup>365</sup>                                                                                                                                                                              | LQT3      | Rivolta (2002) <sup>364</sup>                                                                        | I1782V | -       | -  |
| 400                          | SCN9A | A1746G | GoF   | Cregg (2013) <sup>301</sup>                                                                                                                                                                                                                | IEM       | Cregg (2013) <sup>301</sup>                                                                          | A1783G | -       | -  |
| 401                          | SCN2A | A1773T | LoF   | Miao (2020) <sup>193</sup>                                                                                                                                                                                                                 | EPI       | Miao (2020) <sup>193</sup>                                                                           | A1783T | -       | -  |
| 402                          | SCN3A | V1769A | GoF   | Zaman (2018) <sup>155</sup><br>Zaman (2020) <sup>147</sup>                                                                                                                                                                                 | EPI       | Zaman (2018) <sup>155</sup>                                                                          | V1784A | -       | NC |
| <b>1786-2009 Cytoplasmic</b> |       |        |       |                                                                                                                                                                                                                                            |           |                                                                                                      |        |         |    |
| 403                          | SCN5A | N1774D | GoF   | Kato (2014) <sup>94</sup>                                                                                                                                                                                                                  | LQT3      | Kato (2014) <sup>94</sup>                                                                            | N1788D | -       | -  |
| 404                          | SCN8A | N1768D | GoF   | Veeramah (2012) <sup>366</sup><br>Patel (2016) <sup>247</sup><br>Baker (2018) <sup>367</sup>                                                                                                                                               | EPI       | Veeramah (2012) <sup>366</sup>                                                                       |        | -       | -  |
| 405                          | SCN5A | N1774H | Mixed | Neubauer (2019) <sup>368</sup>                                                                                                                                                                                                             | LQT3      | Neubauer (2019) <sup>368</sup>                                                                       | N1788H | -       | -  |
| 406                          | SCN5A | E1784K | Mixed | Deschenes (2000) <sup>269</sup><br>Abdelsayed (2015) <sup>204</sup><br>Peters (2016) <sup>88</sup><br>Veltmann (2016) <sup>108</sup><br>Abdelsayed (2017) <sup>369</sup><br>Abdelsayed (2018) <sup>370</sup><br>Glazer (2020) <sup>1</sup> | LQT3; BrS | Deschenes (2000) <sup>269</sup><br>Takahashi (2014) <sup>371</sup><br>Veltmann (2016) <sup>108</sup> | E1798K | -       | NC |
| 407                          | SCN5A | S1787N | GoF   | Hu (2015) <sup>372</sup>                                                                                                                                                                                                                   | LQT3      | Splawski (2000) <sup>373</sup>                                                                       | S1801N | 8.29e-4 | NC |
| 408                          | SCN5A | D1790G | Mixed | An (1998) <sup>374</sup><br>Wehrens (2000) <sup>375</sup><br>Baroudi (2000) <sup>376</sup>                                                                                                                                                 | LQT3; BrS | Benhorin (1998) <sup>377</sup><br>Blich (2015) <sup>378</sup>                                        | D1804G | -       | -  |
| 409                          | SCN1A | F1808L | Mixed | Rhodes (2005) <sup>130</sup>                                                                                                                                                                                                               | EPI       | Fujiwara (2003) <sup>131</sup>                                                                       | F1808L | -       | -  |
| 410                          | SCN5A | Y1795C | GoF   | Rivolta (2001) <sup>379</sup><br>Berecki (2006) <sup>235</sup><br>Fredj (2006) <sup>380</sup>                                                                                                                                              | LQT3      | Rivolta (2001) <sup>379</sup><br>Benito (2008) <sup>381</sup><br>Kapplinger (2015) <sup>8</sup>      | Y1809C | -       | -  |
| 411                          | SCN5A | Y1795H | LoF   | Rivolta (2001) <sup>379</sup>                                                                                                                                                                                                              | BrS       | Rivolta (2001) <sup>379</sup>                                                                        | Y1809H | -       | -  |
| 412                          | SCN2A | E1803G | GoF   | Begemann (2019) <sup>180</sup>                                                                                                                                                                                                             | EPI       | Papuc (2019) <sup>382</sup><br>Begemann (2019) <sup>180</sup>                                        | E1813G | -       | -  |
| 413                          | SCN4A | Q1633E | GoF   | Kubota (2009) <sup>383</sup>                                                                                                                                                                                                               | PAM       | Kubota (2009) <sup>383</sup>                                                                         | Q1821E | -       | -  |
| 414                          | SCN1A | F1831S | LoF   | Sugawara (2003) <sup>184</sup>                                                                                                                                                                                                             | EPI       | Fujiwara (2003) <sup>131</sup>                                                                       | F1831S | -       | -  |
| 415                          | SCN5A | L1825P | LoF   | Liu (2005) <sup>384</sup>                                                                                                                                                                                                                  | LQT3      | Makita (2002) <sup>385</sup>                                                                         | L1839P | -       | -  |
| 416                          | SCN5A | Q1832E | LoF   | Gando (2017) <sup>386</sup>                                                                                                                                                                                                                | BrS       | Gando (2017) <sup>386</sup>                                                                          | K1846E | 9.97e-5 | NC |

|     |        |        |       |                                                                                            |           |                                                                                                                            |        |         |    |
|-----|--------|--------|-------|--------------------------------------------------------------------------------------------|-----------|----------------------------------------------------------------------------------------------------------------------------|--------|---------|----|
| 417 | SCN1A  | M1852T | Mixed | Rusconi (2007) <sup>387</sup>                                                              | EPI       | Annesi (2003) <sup>125</sup>                                                                                               | M1852T | -       | NC |
| 418 | SCN5A  | C1850S | LoF   | Petitprez (2008) <sup>388</sup>                                                            | BrS       | Petitprez (2008) <sup>388</sup>                                                                                            | C1864S | -       | -  |
| 419 | SCN1A  | D1866Y | GoF   | Spampanato (2004) <sup>389</sup>                                                           | EPI       | Spampanato (2004) <sup>389</sup>                                                                                           | D1866Y | -       | -  |
| 420 | SCN2A  | M1879T | GoF   | Adney (2020) <sup>390</sup>                                                                | EPI       | Adney (2020) <sup>390</sup>                                                                                                | M1889T | -       | -  |
| 421 | SCN8A  | R1872L | GoF   | Wagon (2015) <sup>314</sup><br>Zaman (2019) <sup>22</sup>                                  | EPI       | Wagon (2015) <sup>314</sup><br>Zaman (2019) <sup>22</sup>                                                                  | R1892L | -       | NC |
| 422 | SCN2A  | R1882G | GoF   | Schwarz (2016) <sup>63</sup>                                                               | EPI       | Schwarz (2016) <sup>63</sup>                                                                                               | R1892G | -       | NC |
| 423 | SCN2A  | R1882Q | GoF   | Wolff (2017) <sup>96</sup><br>Berecki (2018) <sup>141</sup><br>Mason (2019) <sup>142</sup> | EPI       | Howell (2015) <sup>391</sup><br>Trump (2016) <sup>392</sup><br>Wolff (2017) <sup>96</sup><br>Berecki (2018) <sup>141</sup> | R1892Q | -       | NC |
| 424 | SCN8A  | R1872Q | GoF   | Wagon (2015) <sup>314</sup><br>Aktin (2018) <sup>393</sup>                                 | EPI       | Wagon (2015) <sup>314</sup><br>Atkin (2018) <sup>393</sup>                                                                 |        | 4.02e-6 | NC |
| 425 | SCN8A  | R1872W | GoF   | Liu (2019) <sup>288</sup><br>Zaman (2019) <sup>22</sup>                                    | EPI       | Gardella (2016) <sup>394</sup><br>Zaman (2019) <sup>22</sup>                                                               | R1892W | -       | NC |
| 426 | SCN1A  | T1909I | Mixed | Ohmori (2006) <sup>30</sup>                                                                | EPI       | Ohmori (2002) <sup>30</sup>                                                                                                | T1909I | -       | -  |
| 427 | SCN5A  | R1897W | LoF   | Olesen (2012) <sup>219</sup>                                                               | LQT3      | Kapplinger (2009) <sup>19</sup>                                                                                            | K1911W | -       | NC |
| 428 | SCN5A  | R1898C | LoF   | Glazer (2020) <sup>1</sup>                                                                 | BrS       | Selga (2015) <sup>395</sup><br>Zhang (2016) <sup>396</sup>                                                                 | R1912C | 3.56e-5 | NC |
| 429 | SCN1A  | Q1923R | LoF   | Nissenkorn (2019) <sup>29</sup>                                                            | EPI       | Shi (2012) <sup>40</sup><br>Nissenkorn (2019) <sup>29</sup>                                                                | Q1923R | -       | -  |
| 430 | SCN5A  | Q1909R | Mixed | Winkel (2015) <sup>103</sup><br>Abdelsayed (2017) <sup>369</sup>                           | LQT3      | Winkel (2015) <sup>103</sup><br>Kapplinger (2015) <sup>8</sup>                                                             |        | -       | -  |
| 431 | SCN1A  | R1927G | LoF   | Rusconi (2009) <sup>397</sup>                                                              | EPI       | Rusconi (2009) <sup>397</sup>                                                                                              | R1927G | -       | -  |
| 432 | SCN1A  | T1934I | LoF   | Kluckova (2020) <sup>10</sup>                                                              | EPI       | Kluckova (2020) <sup>10</sup>                                                                                              | T1934I | 3.19e-5 | NC |
| 433 | SCN10A | A1886V | GoF   | Savio-Galimberti (2014) <sup>28</sup>                                                      | AF        | Savio-Galimberti (2014) <sup>28</sup>                                                                                      | G1950V | 1.20e-3 | NC |
| 434 | SCN5A  | I1968S | LoF   | Frustaci (2005) <sup>87</sup>                                                              | BrS       | Frustaci (2005) <sup>87</sup>                                                                                              | M1977S | 1.64e-5 | NC |
| 435 | SCN5A  | Y1977N | Mixed | Casini (2019) <sup>398</sup>                                                               | LQT3      | Casini (2019) <sup>398</sup>                                                                                               | Y1986N | -       | NC |
| 436 | SCN5A  | F2004L | LoF   | Bebarova (2008) <sup>399</sup>                                                             | LQT3; BrS | Bebarova (2008) <sup>399</sup><br>Arnestad (2007) <sup>400</sup>                                                           | -      | 1.02e-5 | NC |
| 437 | SCN5A  | P2006A | GoF   | Shinlapawittayatorn (2011) <sup>401</sup>                                                  | LQT3      | Shinlapawittayatorn(2011) <sup>401</sup>                                                                                   | -      | 1.11e-3 | NC |

**Legend:**

gnomAD frequencies (marked in grey)

NC = not conserved (marked in grey) = corresponding position of variants do not share the same amino acid

STW = Similar to Wildtype function (variant marked in grey)

**Phenotypical features:** AF = atrial fibrillation, ASD = autism spectrum disorder, BrS = Brugada syndrome, CAP = cold aggravated pain, CMS = congenital myasthenic syndrome, DEE = developmental and epileptic encephalopathy, DS = Dravet syndrome, ECG = electrocardiogram, echo = echocardiogram, EPI = epilepsy, FHM3 = familial hemiplegic migraine type 3, GEFS+ = genetic epilepsy with febrile seizures plus, Hyper-PP = hyperkalaemic periodic paralysis, Hypo-PP = hypokalaemic periodic paralysis, IEM = inherited erythromelalgia, LQT3 = long QT3 syndrome, NDD = neurodevelopmental disorder, PAM = potassium-aggravated myotonia, PDN = painful diabetic neuropathy, PEPD = paroxysmal extreme pain disorder, PMC = paramyotonia congenita, PMG = polymicrogyria, PPN = painful peripheral neuropathy, SCB = sodium channel blocker, SCD = sudden cardiac death, SIDS = sudden infant death syndrome, SSS = sick sinus syndrome, SUD = sudden unexplained death, Sz = seizure, TdP = torsade de pointes, VT = ventricular tachycardia

## References

1. Glazer AM, Wada Y, Li B, et al. High-Throughput Reclassification of SCN5A Variants. *Am J Hum Genet* 2020.
2. Millat G, Chevalier P, Restier-Miron L, et al. Spectrum of pathogenic mutations and associated polymorphisms in a cohort of 44 unrelated patients with long QT syndrome. *Clinical Genetics* 2006;70:214-27.
3. Gutter C, Benndorf K, Zimmer T. Characterization of N-terminally mutated cardiac Na(+) channels associated with long QT syndrome 3 and Brugada syndrome. *Front Physiol* 2013;4:153.
4. Han C, Dib-Hajj SD, Lin Z, et al. Early- and late-onset inherited erythromelalgia: genotype-phenotype correlation. *Brain* 2009;132:1711-22.
5. Ben-Shalom R, Keeshen CM, Berrios KN, An JY, Sanders SJ, Bender KJ. Opposing Effects on NaV1.2 Function Underlie Differences Between SCN2A Variants Observed in Individuals With Autism Spectrum Disorder or Infantile Seizures. *Biol Psychiatry* 2017;82:224-32.
6. Tester DJ, Will ML, Haglund CM, Ackerman MJ. Compendium of cardiac channel mutations in 541 consecutive unrelated patients referred for long QT syndrome genetic testing. *Heart Rhythm* 2005;2:507-17.
7. Priori SG, Napolitano C, Gasparini M, et al. Natural history of Brugada syndrome: insights for risk stratification and management. *Circulation* 2002;105:1342-7.
8. Kapplinger JD, Giudicessi JR, Ye D, et al. Enhanced Classification of Brugada Syndrome-Associated and Long-QT Syndrome-Associated Genetic Variants in the SCN5A-Encoded Na(v)1.5 Cardiac Sodium Channel. *Circ Cardiovasc Genet* 2015;8:582-95.
9. Lin MT, Wu MH, Chang CC, et al. In utero onset of long QT syndrome with atrioventricular block and spontaneous or lidocaine-induced ventricular tachycardia: compound effects of hERG pore region mutation and SCN5A N-terminus variant. *Heart Rhythm* 2008;5:1567-74.
10. Kluckova D, Kolnikova M, Lacinova L, et al. A Study among the Genotype, Functional Alternations, and Phenotype of 9 SCN1A Mutations in Epilepsy Patients. *Sci Rep* 2020;10:10288.
11. Mancardi MM, Striano P, Gennaro E, et al. Familial occurrence of febrile seizures and epilepsy in severe myoclonic epilepsy of infancy (SMEI) patients with SCN1A mutations. *Epilepsia* 2006;47:1629-35.
12. Kapplinger JD, Tester DJ, Alders M, et al. An international compendium of mutations in the SCN5A-encoded cardiac sodium channel in patients referred for Brugada syndrome genetic testing. *Heart Rhythm* 2010;7:33-46.
13. Jabbari J, Olesen MS, Yuan L, et al. Common and Rare Variants in *SCN10A* Modulate the Risk of Atrial Fibrillation. *Circulation: Cardiovascular Genetics* 2015;8:64-73.
14. Zaharieva IT, Thor MG, Oates EC, et al. Loss-of-function mutations in SCN4A cause severe foetal hypokinesia or 'classical' congenital myopathy. *Brain* 2016;139:674-91.
15. Levy-Nissenbaum E, Eldar M, Wang Q, et al. Genetic analysis of Brugada syndrome in Israel: two novel mutations and possible genetic heterogeneity. *Genet Test* 2001;5:331-4.
16. Clatot J, Ziyadeh-Isleem A, Maugenre S, et al. Dominant-negative effect of SCN5A N-terminal mutations through the interaction of Na(v)1.5  $\alpha$ -subunits. *Cardiovasc Res* 2012;96:53-63.
17. Holst AG, Liang B, Jespersen T, et al. Sick sinus syndrome, progressive cardiac conduction disease, atrial flutter and ventricular tachycardia caused by a novel SCN5A mutation. *Cardiology* 2010;115:311-6.
18. Moreau A, Keller DI, Huang H, et al. Mexiletine differentially restores the trafficking defects caused by two brugada syndrome mutations. *Front Pharmacol* 2012;3:62.
19. Kapplinger JD, Tester DJ, Salisbury BA, et al. Spectrum and prevalence of mutations from the first 2,500 consecutive unrelated patients referred for the FAMILION long QT syndrome genetic test. *Heart rhythm* 2009;6:1297-303.
20. Yokokawa M, Noda T, Okamura H, et al. Comparison of Long-Term Follow-Up of Electrocardiographic Features in Brugada Syndrome Between the SCN5A-Positive Proband and the SCN5A-Negative Proband. *The American Journal of Cardiology* 2007;100:649-55.
21. Yamagata K, Horie M, Aiba T, et al. Genotype-Phenotype Correlation of SCN5A Mutation for the Clinical and Electrocardiographic Characteristics of Proband With Brugada Syndrome: A Japanese Multicenter Registry. *Circulation* 2017;135:2255-70.

22. Zaman T, Abou Tayoun A, Goldberg EM. A single-center SCN8A-related epilepsy cohort: clinical, genetic, and physiologic characterization. *Ann Clin Transl Neurol* 2019;6:1445-55.
23. Petitprez S, Tiab L, Chen L, et al. A novel dominant mutation of the Nav1.4 alpha-subunit domain I leading to sodium channel myotonia. *Neurology* 2008;71:1669-75.
24. Cheng X, Dib-Hajj SD, Tyrrell L, Waxman SG. Mutation I136V alters electrophysiological properties of the Na(v)1.7 channel in a family with onset of erythromelalgia in the second decade. *Mol Pain* 2008;4:1.
25. Lee MJ, Yu HS, Hsieh ST, Stephenson DA, Lu CJ, Yang CC. Characterization of a familial case with primary erythromelalgia from Taiwan. *J Neurol* 2007;254:210-4.
26. Mantegazza M, Gambardella A, Rusconi R, et al. Identification of an Nav1.1 sodium channel (SCN1A) loss-of-function mutation associated with familial simple febrile seizures. *Proc Natl Acad Sci USA* 2005;102:18177-82.
27. Smits JP, Koopmann TT, Wilders R, et al. A mutation in the human cardiac sodium channel (E161K) contributes to sick sinus syndrome, conduction disease and Brugada syndrome in two families. *J Mol Cell Cardiol* 2005;38:969-81.
28. Savio-Galimberti E, Weeke P, Muhammad R, et al. SCN10A/Nav1.8 modulation of peak and late sodium currents in patients with early onset atrial fibrillation. *Cardiovasc Res* 2014;104:355-63.
29. Nissenkorn A, Almog Y, Adler I, et al. In vivo, in vitro and in silico correlations of four de novo SCN1A missense mutations. *PLoS One* 2019;14:e0211901.
30. Ohmori I, Kahlig KM, Rhodes TH, Wang DW, George AL, Jr. Nonfunctional SCN1A is common in severe myoclonic epilepsy of infancy. *Epilepsia* 2006;47:1636-42.
31. Makiyama T, Akao M, Tsuji K, et al. High risk for bradyarrhythmic complications in patients with Brugada syndrome caused by SCN5A gene mutations. *J Am Coll Cardiol* 2005;46:2100-6.
32. Sugawara T, Tsurubuchi Y, Agarwala KL, et al. A missense mutation of the Na<sup>+</sup> channel alpha II subunit gene Na(v)1.2 in a patient with febrile and afebrile seizures causes channel dysfunction. *Proc Natl Acad Sci U S A* 2001;98:6384-9.
33. Lauxmann S, Verbeek NE, Liu Y, et al. Relationship of electrophysiological dysfunction and clinical severity in SCN2A-related epilepsies. *Hum Mutat* 2018;39:1942-56.
34. Lemke JR, Riesch E, Scheurenbrand T, et al. Targeted next generation sequencing as a diagnostic tool in epileptic disorders. *Epilepsia* 2012;53:1387-98.
35. Marangoni S, Di Resta C, Rocchetti M, et al. A Brugada syndrome mutation (p.S216L) and its modulation by p.H558R polymorphism: standard and dynamic characterization. *Cardiovasc Res* 2011;91:606-16.
36. Wang DW, Desai RR, Crotti L, et al. Cardiac sodium channel dysfunction in sudden infant death syndrome. *Circulation* 2007;115:368-76.
37. Estacion M, Choi JS, Eastman EM, et al. Can robots patch-clamp as well as humans? Characterization of a novel sodium channel mutation. *J Physiol* 2010;588:1915-27.
38. Han C, Yang Y, Te Morsche RH, et al. Familial gain-of-function Nav1.9 mutation in a painful channelopathy. *J Neurol Neurosurg Psychiatry* 2017;88:233-40.
39. Okuda H, Noguchi A, Kobayashi H, et al. Infantile Pain Episodes Associated with Novel Nav1.9 Mutations in Familial Episodic Pain Syndrome in Japanese Families. *PLoS One* 2016;11:e0154827.
40. Choi JS, Dib-Hajj SD, Waxman SG. Inherited erythromelalgia: limb pain from an S4 charge-neutral Na channelopathy. *Neurology* 2006;67:1563-7.
41. Sheets PL, Jackson JO, 2nd, Waxman SG, Dib-Hajj SD, Cummins TR. A Nav1.7 channel mutation associated with hereditary erythromelalgia contributes to neuronal hyperexcitability and displays reduced lidocaine sensitivity. *J Physiol* 2007;581:1019-31.
42. Drenth JP, te Morsche RH, Guillet G, Taieb A, Kirby RL, Jansen JB. SCN9A mutations define primary erythromelalgia as a neuropathic disorder of voltage gated sodium channels. *J Invest Dermatol* 2005;124:1333-8.
43. Kim MK, Yuk JW, Kim HS, Park KJ, Kim DS. Autonomic dysfunction in SCN9A-associated primary erythromelalgia. *Clin Auton Res* 2013;23:105-7.
44. de Kovel CG, Meisler MH, Brilstra EH, et al. Characterization of a de novo SCN8A mutation in a patient with epileptic encephalopathy. *Epilepsy Res* 2014;108:1511-8.

45. Bezzina CR, Rook MB, Groenewegen WA, et al. Compound heterozygosity for mutations (W156X and R225W) in SCN5A associated with severe cardiac conduction disturbances and degenerative changes in the conduction system. *Circ Res* 2003;92:159-68.
46. Beckermann TM, McLeod K, Murday V, Potet F, George AL, Jr. Novel SCN5A mutation in amiodarone-responsive multifocal ventricular ectopy-associated cardiomyopathy. *Heart Rhythm* 2014;11:1446-53.
47. Tan BY, Yong RY, Barajas-Martinez H, et al. A Brugada syndrome proband with compound heterozygote SCN5A mutations identified from a Chinese family in Singapore. *Europace* 2016;18:897-904.
48. Berecki GB, A.: Terhag, J.: Maljevic, S.: Gazina, E. V.: Hill, S. L.: Petrou, S. SCN1A gain of function in early infantile encephalopathy. *Ann Neurol* 2019;85:514-25.
49. Sadleir LG, Mountier EI, Gill D, et al. Not all SCN1A epileptic encephalopathies are Dravet syndrome: Early profound Thr226Met phenotype. *Neurology* 2017;89:1035-42.
50. Nabbout R, Gennaro E, Dalla Bernardina B, et al. Spectrum of SCN1A mutations in severe myoclonic epilepsy of infancy. *Neurology* 2003;60:1961-7.
51. Barajas-Martínez HM, Hu D, Cordeiro JM, et al. Lidocaine-induced Brugada syndrome phenotype linked to a novel double mutation in the cardiac sodium channel. *Circ Res* 2008;103:396-404.
52. Estacion M, Han C, Choi JS, et al. Intra- and interfamily phenotypic diversity in pain syndromes associated with a gain-of-function variant of Nav1.7. *Mol Pain* 2011;7:92.
53. Faber CG, Hoeijmakers JG, Ahn HS, et al. Gain of function Nav1.7 mutations in idiopathic small fiber neuropathy. *Ann Neurol* 2012;71:26-39.
54. Thompson CH, Ben-Shalom R, Bender KJ, George AL. Alternative splicing potentiates dysfunction of early-onset epileptic encephalopathy SCN2A variants. *J Gen Physiol* 2020;152.
55. Nakamura K, Kato M, Osaka H, et al. Clinical spectrum of SCN2A mutations expanding to Ohtahara syndrome. *Neurology* 2013;81:992-8.
56. Ahn HS, Dib-Hajj SD, Cox JJ, et al. A new Nav1.7 sodium channel mutation I234T in a child with severe pain. *Eur J Pain* 2010;14:944-50.
57. Tsujino A, Maertens C, Ohno K, et al. Myasthenic syndrome caused by mutation of the SCN4A sodium channel. *Proc Natl Acad Sci U S A* 2003;100:7377-82.
58. Lampert A, Dib-Hajj SD, Tyrrell L, Waxman SG. Size matters: Erythromelalgia mutation S241T in Nav1.7 alters channel gating. *J Biol Chem* 2006;281:36029-35.
59. Michiels JJ, te Morsche RH, Jansen JB, Drenth JP. Autosomal dominant erythromelalgia associated with a novel mutation in the voltage-gated sodium channel alpha subunit Nav1.7. *Arch Neurol* 2005;62:1587-90.
60. Han C, Themistocleous AC, Estacion M, et al. The Novel Activity of Carbamazepine as an Activation Modulator Extends from Nav1.7 Mutations to the Nav1.8-S242T Mutant Channel from a Patient with Painful Diabetic Neuropathy. *Mol Pharmacol* 2018;94:1256-69.
61. Lamar T, Vanoye CG, Calhoun J, et al. SCN3A deficiency associated with increased seizure susceptibility. *Neurobiol Dis* 2017;102:38-48.
62. Liao Y, Anttonen AK, Liukkonen E, et al. SCN2A mutation associated with neonatal epilepsy, late-onset episodic ataxia, myoclonus, and pain. *Neurology* 2010;75:1454-8.
63. Schwarz N, Hahn A, Bast T, et al. Mutations in the sodium channel gene SCN2A cause neonatal epilepsy with late-onset episodic ataxia. *J Neurol* 2016;263:334-43.
64. Kahlig KM, Rhodes TH, Pusch M, et al. Divergent sodium channel defects in familial hemiplegic migraine. *Proc Natl Acad Sci USA* 2008;105:9799-804.
65. Wengert ER, Tronhjems CE, Wagnon JL, et al. Biallelic inherited SCN8A variants, a rare cause of SCN8A-related developmental and epileptic encephalopathy. *Epilepsia* 2019;60:2277-85.
66. Carle T, Fournier E, Sternberg D, Fontaine B, Tabti N. Cold-induced disruption of Na<sup>+</sup> channel slow inactivation underlies paralysis in highly thermosensitive paramyotonia. *J Physiol* 2009;587:1705-14.
67. Calloe K, Schmitt N, Grubb S, et al. Multiple arrhythmic syndromes in a newborn, owing to a novel mutation in SCN5A. *Can J Physiol Pharmacol* 2011;89:723-36.

68. Sommariva E, Pappone C, Martinelli Boneschi F, et al. Genetics can contribute to the prognosis of Brugada syndrome: a pilot model for risk stratification. *Eur J Hum Genet* 2013;21:911-7.
69. Poelzing S, Forleo C, Samodell M, et al. SCN5A polymorphism restores trafficking of a Brugada syndrome mutation on a separate gene. *Circulation* 2006;114:368-76.
70. Itoh H, Shimizu M, Mabuchi H, Imoto K. Clinical and electrophysiological characteristics of Brugada syndrome caused by a missense mutation in the S5-pore site of SCN5A. *J Cardiovasc Electrophysiol* 2005;16:378-83.
71. Andorin A, Behr ER, Denjoy I, et al. Impact of clinical and genetic findings on the management of young patients with Brugada syndrome. *Heart Rhythm* 2016;13:1274-82.
72. Binini N, Sancini G, Villa C, et al. Identification of two mutations in cis in the SCN1A gene in a family showing genetic epilepsy with febrile seizures plus (GEFS+) and idiopathic generalized epilepsy (IGE). *Brain Res* 2017;1677:26-32.
73. Keller DI, Rougier JS, Kucera JP, et al. Brugada syndrome and fever: genetic and molecular characterization of patients carrying SCN5A mutations. *Cardiovasc Res* 2005;67:510-9.
74. Van Malderen SCH, Daneels D, Kerkhove D, et al. Prolonged Right Ventricular Ejection Delay in Brugada Syndrome Depends on the Type of SCN5A Variant - Electromechanical Coupling Through Tissue Velocity Imaging as a Bridge Between Genotyping and Phenotyping. *Circ J* 2017;82:53-61.
75. Cordeiro JM, Barajas-Martinez H, Hong K, et al. Compound heterozygous mutations P336L and I1660V in the human cardiac sodium channel associated with the Brugada syndrome. *Circulation* 2006;114:2026-33.
76. Estacion M, Gasser A, Dib-Hajj SD, Waxman SG. A sodium channel mutation linked to epilepsy increases ramp and persistent current of Nav1.3 and induces hyperexcitability in hippocampal neurons. *Exp Neurol* 2010;224:362-8.
77. Holland KD, Kearney JA, Glauser TA, et al. Mutation of sodium channel SCN3A in a patient with cryptogenic pediatric partial epilepsy. *Neuroscience Letters* 2008;433:65-70.
78. Probst V, Allouis M, Sacher F, et al. Progressive cardiac conduction defect is the prevailing phenotype in carriers of a Brugada syndrome SCN5A mutation. *J Cardiovasc Electrophysiol* 2006;17:270-5.
79. Savastano S, Rordorf R, Vicentini A, et al. A comprehensive electrocardiographic, molecular, and echocardiographic study of Brugada syndrome: Validation of the 2013 diagnostic criteria. *Heart Rhythm* 2014;11:1176-83.
80. Pfahnl AE, Viswanathan PC, Weiss R, et al. A sodium channel pore mutation causing Brugada syndrome. *Heart Rhythm* 2007;4:46-53.
81. Zhang J, Chen Y, Yang J, et al. Electrophysiological and trafficking defects of the SCN5A T353I mutation in Brugada syndrome are rescued by alpha-allocryptopine. *Eur J Pharmacol* 2015;746:333-43.
82. Amin AS, Boink GJ, Atrafi F, et al. Facilitatory and inhibitory effects of SCN5A mutations on atrial fibrillation in Brugada syndrome. *Europace* 2011;13:968-75.
83. Hong K, Berruezo-Sanchez A, Pongvarin N, et al. Phenotypic characterization of a large European family with Brugada syndrome displaying a sudden unexpected death syndrome mutation in SCN5A. *J Cardiovasc Electrophysiol* 2004;15:64-9.
84. Probst V, Denjoy I, Meregalli PG, et al. Clinical aspects and prognosis of Brugada syndrome in children. *Circulation* 2007;115:2042-8.
85. Nakajima T, Dharmawan T, Kawabata-Iwakawa R, et al. Reduced current density, partially rescued by mexiletine, and depolarizing shift in activation of SCN5A W374G channels as a cause of severe form of Brugada syndrome. *Ann Noninvasive Electrocardiol* 2021:e12828.
86. Rossenbacker T, Carroll SJ, Liu H, et al. Novel pore mutation in SCN5A manifests as a spectrum of phenotypes ranging from atrial flutter, conduction disease, and Brugada syndrome to sudden cardiac death. *Heart Rhythm* 2004;1:610-5.
87. Frustaci A, Priori SG, Pieroni M, et al. Cardiac histological substrate in patients with clinical phenotype of Brugada syndrome. *Circulation* 2005;112:3680-7.
88. Peters CH, Abdelsayed M, Ruben PC. Triggers for arrhythmogenesis in the Brugada and long QT 3 syndromes. *Prog Biophys Mol Biol* 2016;120:77-88.
89. Claes L, Ceulemans B, Audenaert D, et al. De novo SCN1A mutations are a major cause of severe myoclonic epilepsy of infancy. *Hum Mutat* 2003;21:615-21.



90. Huang J, Han C, Estacion M, et al. Gain-of-function mutations in sodium channel Na(v)1.9 in painful neuropathy. *Brain* 2014;137:1627-42.
91. Gando I, Williams N, Fishman GI, Sampson BA, Tang Y, Coetzee WA. Functional characterization of SCN10A variants in several cases of sudden unexplained death. *Forensic Sci Int* 2019;301:289-98.
92. Lossin C, Nam TS, Shahangian S, et al. Altered fast and slow inactivation of the N440K Nav1.4 mutant in a periodic paralysis syndrome. *Neurology* 2012;79:1033-40.
93. Hu RM, Tester DJ, Li R, et al. Mexiletine rescues a mixed biophysical phenotype of the cardiac sodium channel arising from the SCN5A mutation, N406K, found in LQT3 patients. *Channels (Austin)* 2018;12:176-86.
94. Kato K, Makiyama T, Wu J, et al. Cardiac channelopathies associated with infantile fatal ventricular arrhythmias: from the cradle to the bench. *J Cardiovasc Electrophysiol* 2014;25:66-73.
95. Itoh H, Tsuji K, Sakaguchi T, et al. A paradoxical effect of lidocaine for the N406S mutation of SCN5A associated with Brugada syndrome. *Int J Cardiol* 2007;121:239-48.
96. Wolff M, Johannesen KM, Hedrich UBS, et al. Genetic and phenotypic heterogeneity suggest therapeutic implications in SCN2A-related disorders. *Brain* 2017;140:1316-36.
97. Wang DW, VanDeCarr D, Ruben PC, George AL, Jr., Bennett PB. Functional consequences of a domain 1/S6 segment sodium channel mutation associated with painful congenital myotonia. *FEBS Lett* 1999;448:231-4.
98. Huang CW, Lai HJ, Lin PC, Lee MJ. Changes of Resurgent Na(+) Currents in the Nav1.4 Channel Resulting from an SCN4A Mutation Contributing to Sodium Channel Myotonia. *Int J Mol Sci* 2020;21.
99. Liu XL, Huang XJ, Luan XH, et al. Mutations of SCN4A gene cause different diseases: 2 case reports and literature review. *Channels (Austin)* 2015;9:82-7.
100. Horne AJ, Eldstrom J, Sanatani S, Fedida D. A novel mechanism for LQT3 with 2:1 block: a pore-lining mutation in Nav1.5 significantly affects voltage-dependence of activation. *Heart Rhythm* 2011;8:770-7.
101. Zhou H, Li Z, Ali Raza G, et al. [High incidence of sudden cardiac death in one family with type-3 long QT syndrome: molecular genetics and electrophysiology mechanism analysis]. *Zhonghua Xin Xue Guan Bing Za Zhi* 2015;43:1046-50.
102. Fischer TZ, Gilmore ES, Estacion M, et al. A novel Nav1.7 mutation producing carbamazepine-responsive erythromelalgia. *Ann Neurol* 2009;65:733-41.
103. Winkel BG, Yuan L, Olesen MS, et al. The role of the sodium current complex in a nonreferred nationwide cohort of sudden infant death syndrome. *Heart Rhythm* 2015;12:1241-9.
104. Chiang KC, Lai LP, Shieh RC. Characterization of a novel Nav1.5 channel mutation, A551T, associated with Brugada syndrome. *J Biomed Sci* 2009;16:76.
105. Juang JM, Lu TP, Lai LC, et al. Utilizing multiple in silico analyses to identify putative causal SCN5A variants in Brugada syndrome. *Sci Rep* 2014;4:3850.
106. Ye B, Valdivia CR, Ackerman MJ, Makielski JC. A common human SCN5A polymorphism modifies expression of an arrhythmia causing mutation. *Physiol Genomics* 2003;12:187-93.
107. Tester DJ, Valdivia C, Harris-Kerr C, et al. Epidemiologic, molecular, and functional evidence suggest A572D-SCN5A should not be considered an independent LQT3-susceptibility mutation. *Heart Rhythm* 2010;7:912-9.
108. Veltmann C, Barajas-Martinez H, Wolpert C, et al. Further Insights in the Most Common SCN5A Mutation Causing Overlapping Phenotype of Long QT Syndrome, Brugada Syndrome, and Conduction Defect. *J Am Heart Assoc* 2016;5.

109. Wan X, Chen S, Sadeghpour A, Wang Q, Kirsch GE. Accelerated inactivation in a mutant Na(+) channel associated with idiopathic ventricular fibrillation. *Am J Physiol Heart Circ Physiol* 2001;280:H354-60.
110. Priori SG, Napolitano C, Giordano U, Collisani G, Memmi M. Brugada syndrome and sudden cardiac death in children. *Lancet* 2000;355:808-9.
111. Faber CG, Lauria G, Merkies IS, et al. Gain-of-function Nav1.8 mutations in painful neuropathy. *Proc Natl Acad Sci U S A* 2012;109:19444-9.
112. Ahn HS, Vasylyev DV, Estacion M, et al. Differential effect of D623N variant and wild-type Na(v)1.7 sodium channels on resting potential and interspike membrane potential of dorsal root ganglion neurons. *Brain Res* 2013;1529:165-77.
113. Wehrens XH, Rossenbacker T, Jongbloed RJ, et al. A novel mutation L619F in the cardiac Na<sup>+</sup> channel SCN5A associated with long-QT syndrome (LQT3): a role for the I-II linker in inactivation gating. *Hum Mutat* 2003;21:552.
114. Calloe K, Refaat MM, Grubb S, et al. Characterization and mechanisms of action of novel Nav1.5 channel mutations associated with Brugada syndrome. *Circ Arrhythm Electrophysiol* 2013;6:177-84.
115. Hong K, Hu J, Yu J, Brugada R. Concomitant Brugada-like and short QT electrocardiogram linked to SCN5A mutation. *Eur J Hum Genet* 2012;20:1189-92.
116. Kist AM, Sagafos D, Rush AM, et al. SCN10A Mutation in a Patient with Erythromelalgia Enhances C-Fiber Activity Dependent Slowing. *PLoS One* 2016;11:e0161789.
117. Han C, Hoeijmakers JG, Ahn HS, et al. Nav1.7-related small fiber neuropathy: impaired slow-inactivation and DRG neuron hyperexcitability. *Neurology* 2012;78:1635-43.
118. Estacion M, O'Brien JE, Conravey A, et al. A novel de novo mutation of SCN8A (Nav1.6) with enhanced channel activation in a child with epileptic encephalopathy. *Neurobiol Dis* 2014;69:117-23.
119. Pan Y, Cummins TR. Distinct functional alterations in SCN8A epilepsy mutant channels. *J Physiol* 2020;598:381-401.
120. Le Scouarnec S, Karakachoff M, Gourraud JB, et al. Testing the burden of rare variation in arrhythmia-susceptibility genes provides new insights into molecular diagnosis for Brugada syndrome. *Hum Mol Genet* 2015;24:2757-63.
121. Nakajima T, Kaneko Y, Saito A, et al. Identification of six novel SCN5A mutations in Japanese patients with Brugada syndrome. *Int Heart J* 2011;52:27-31.
122. García-Castro M, García C, Reguero JR, et al. The spectrum of SCN5A gene mutations in Spanish Brugada syndrome patients. *Rev Esp Cardiol* 2010;63:856-9.
123. de la Roche J, Angsutararux P, Kempf H, et al. Comparing human iPSC-cardiomyocytes versus HEK293T cells unveils disease-causing effects of Brugada mutation A735V of Na(V)1.5 sodium channels. *Sci Rep* 2019;9:11173.
124. Bechi G, Rusconi R, Cestele S, Striano P, Franceschetti S, Mantegazza M. Rescuable folding defective Nav1.1 (SCN1A) mutants in epilepsy: properties, occurrence, and novel rescuing strategy with peptides targeted to the endoplasmic reticulum. *Neurobiol Dis* 2015;75:100-14.
125. Annesi G, Gambardella A, Carrideo S, et al. Two novel SCN1A missense mutations in generalized epilepsy with febrile seizures plus. *Epilepsia* 2003;44:1257-8.
126. Peters S. Arrhythmogenic right ventricular dysplasia-cardiomyopathy and provokable coved-type ST-segment elevation in right precordial leads: clues from long-term follow-up. *Europace* 2008;10:816-20.

127. Smits JP, Eckardt L, Probst V, et al. Genotype-phenotype relationship in Brugada syndrome: electrocardiographic features differentiate SCN5A-related patients from non-SCN5A-related patients. *J Am Coll Cardiol* 2002;40:350-6.
128. Probst V, Wilde AA, Barc J, et al. SCN5A mutations and the role of genetic background in the pathophysiology of Brugada syndrome. *Circ Cardiovasc Genet* 2009;2:552-7.
129. Hoogendijk MG, Potse M, Linnenbank AC, et al. Mechanism of right precordial ST-segment elevation in structural heart disease: excitation failure by current-to-load mismatch. *Heart Rhythm* 2010;7:238-48.
130. Rhodes TH, Vanoye CG, Ohmori I, Ogiwara I, Yamakawa K, George AL, Jr. Sodium channel dysfunction in intractable childhood epilepsy with generalized tonic-clonic seizures. *J Physiol* 2005;569:433-45.
131. Fujiwara T, Sugawara T, Mazaki-Miyazaki E, et al. Mutations of sodium channel alpha subunit type 1 (SCN1A) in intractable childhood epilepsies with frequent generalized tonic-clonic seizures. *Brain* 2003;126:531-46.
132. Sayeed MZ, Salam MA, Haque MZ, Islam AK. Brugada syndrome with a novel missense mutation in SCN5A gene: a case report from Bangladesh. *Indian Heart J* 2014;66:104-7.
133. Lampert A, Dib-Hajj SD, Eastman EM, et al. Erythromelalgia mutation L823R shifts activation and inactivation of threshold sodium channel Nav1.7 to hyperpolarized potentials. *Biochemical and Biophysical Research Communications* 2009;390:319-24.
134. Volkens L, Kahlig KM, Verbeek NE, et al. Nav 1.1 dysfunction in genetic epilepsy with febrile seizures-plus or Dravet syndrome. *Eur J Neurosci* 2011;34:1268-75.
135. Kuzmenkin A, Muncan V, Jurkat-Rott K, et al. Enhanced inactivation and pH sensitivity of Na(+) channel mutations causing hypokalaemic periodic paralysis type II. *Brain* 2002;125:835-43.
136. Bulman DE, Scoggan KA, van Oene MD, et al. A novel sodium channel mutation in a family with hypokalemic periodic paralysis. *Neurology* 1999;53:1932-6.
137. Depienne C, Trouillard O, Saint-Martin C, et al. Spectrum of SCN1A gene mutations associated with Dravet syndrome: analysis of 333 patients. *J Med Genet* 2009;46:183-91.
138. Kotta CM, Anastasakis A, Gatzoulis K, Manolis AS, Stefanadis C. Novel sodium channel SCN5A mutations in Brugada syndrome patients from Greece. *Int J Cardiol* 2010;145:45-8.
139. Wu B, Zhang Y, Tang H, et al. A Novel SCN9A Mutation (F826Y) in Primary Erythromelalgia Alters the Excitability of Nav1.7. *Curr Mol Med* 2017;17:450-7.
140. Jurkat-Rott K, Mitrovic N, Hang C, et al. Voltage-sensor sodium channel mutations cause hypokalemic periodic paralysis type 2 by enhanced inactivation and reduced current. *Proc Natl Acad Sci U S A* 2000;97:9549-54.
141. Berecki G, Howell KB, Deerasooriya YH, et al. Dynamic action potential clamp predicts functional separation in mild familial and severe de novo forms of SCN2A epilepsy. *Proc Natl Acad Sci U S A* 2018;115:E5516-e25.
142. Mason ER, Wu F, Patel RR, Xiao Y, Cannon SC, Cummins TR. Resurgent and Gating Pore Currents Induced by De Novo SCN2A Epilepsy Mutations. *eNeuro* 2019;6.
143. Epi K, Allen AS, Berkovic SF, et al. De novo mutations in epileptic encephalopathies. *Nature* 2013;501:217-21.
144. Samanta D, Ramakrishnaiah R. De novo R853Q mutation of SCN2A gene and West syndrome. *Acta Neurol Belg* 2015;115:773-6.

145. Kobayashi Y, Tohyama J, Kato M, et al. High prevalence of genetic alterations in early-onset epileptic encephalopathies associated with infantile movement disorders. *Brain Dev* 2016;38:285-92.
146. Li J, Cai T, Jiang Y, et al. Genes with de novo mutations are shared by four neuropsychiatric disorders discovered from NPdenovo database. *Mol Psychiatry* 2016;21:298.
147. Zaman T, Helbig KL, Clatot J, et al. SCN3A-related neurodevelopmental disorder: A spectrum of epilepsy and brain malformation. *Ann Neurol* 2020;88:348-62.
148. Wang L, Meng X, Yuchi Z, et al. De Novo Mutation in the SCN5A Gene Associated with Brugada Syndrome. *Cell Physiol Biochem* 2015;36:2250-62.
149. Wu L, Zhang B, Kang Y, Wu W. Enhanced slow inactivation of the human skeletal muscle sodium channel causing normokalemic periodic paralysis. *Cell Mol Neurobiol* 2014;34:707-14.
150. Frigo G, Rampazzo A, Baucé B, et al. Homozygous SCN5A mutation in Brugada syndrome with monomorphic ventricular tachycardia and structural heart abnormalities. *Europace* 2007;9:391-7.
151. Itoh H, Berthet M, Fressart V, et al. Asymmetry of parental origin in long QT syndrome: preferential maternal transmission of KCNQ1 variants linked to channel dysfunction. *Eur J Hum Genet* 2016;24:1160-6.
152. Kinoshita K, Takahashi H, Hata Y, et al. SCN5A(K817E), a novel Brugada syndrome-associated mutation that alters the activation gating of Nav1.5 channel. *Heart Rhythm* 2016;13:1113-20.
153. Lossin C, Wang DW, Rhodes TH, Vanoye CG, George AL, Jr. Molecular basis of an inherited epilepsy. *Neuron* 2002;34:877-84.
154. Escayg A, MacDonald BT, Meisler MH, et al. Mutations of SCN1A, encoding a neuronal sodium channel, in two families with GEFS+2. *Nat Genet* 2000;24:343-5.
155. Zaman T, Helbig I, Bozovic IB, et al. Mutations in SCN3A cause early infantile epileptic encephalopathy. *Ann Neurol* 2018;83:703-17.
156. Miyatake S, Kato M, Sawaishi Y, et al. Recurrent SCN3A p.Ile875Thr variant in patients with polymicrogyria. *Ann Neurol* 2018;84:159-61.
157. Cummins TR, Dib-Hajj SD, Waxman SG. Electrophysiological properties of mutant Nav1.7 sodium channels in a painful inherited neuropathy. *J Neurosci* 2004;24:8232-6.
158. Namer B, Orstavik K, Schmidt R, et al. Specific changes in conduction velocity recovery cycles of single nociceptors in a patient with erythromelalgia with the I848T gain-of-function mutation of Nav1.7. *Pain* 2015;156:1637-46.
159. Theille JW, Jarecki BW, Piekarczyk AD, Cummins TR. Nav1.7 mutations associated with paroxysmal extreme pain disorder, but not erythromelalgia, enhance Navbeta4 peptide-mediated resurgent sodium currents. *J Physiol* 2011;589:597-608.
160. Yang Y, Wang Y, Li S, et al. Mutations in SCN9A, encoding a sodium channel alpha subunit, in patients with primary erythromelalgia. *J Med Genet* 2004;41:171-4.
161. Han C, Yang Y, de Greef BT, et al. The Domain II S4-S5 Linker in Nav1.9: A Missense Mutation Enhances Activation, Impairs Fast Inactivation, and Produces Human Painful Neuropathy. *Neuromolecular Med* 2015;17:158-69.
162. Hoeijmakers JG, Han C, Merkies IS, et al. Small nerve fibres, small hands and small feet: a new syndrome of pain, dysautonomia and acromesomelia in a kindred with a novel Nav1.7 mutation. *Brain* 2012;135:345-58.

163. Tanaka BS, Nguyen PT, Zhou EY, et al. Gain-of-function mutation of a voltage-gated sodium channel Na(V)1.7 associated with peripheral pain and impaired limb development. *J Biol Chem* 2017;292:9262-72.
164. Han C, Rush AM, Dib-Hajj SD, et al. Sporadic onset of erythromelgia: a gain-of-function mutation in Nav1.7. *Ann Neurol* 2006;59:553-8.
165. Han C, Lampert A, Rush AM, et al. Temperature dependence of erythromelgia mutation L858F in sodium channel Nav1.7. *Mol Pain* 2007;3:3.
166. Cregg R, Cox JJ, Bennett DL, Wood JN, Werdehausen R. Mexiletine as a treatment for primary erythromelgia: normalization of biophysical properties of mutant L858F Nav 1.7 sodium channels. *Br J Pharmacol* 2014;171:4455-63.
167. Estacion M, Waxman SG, Dib-Hajj SD. Effects of ranolazine on wild-type and mutant hNav1.7 channels and on DRG neuron excitability. *Mol Pain* 2010;6:35.
168. Vasylyev DV, Han C, Zhao P, Dib-Hajj S, Waxman SG. Dynamic-clamp analysis of wild-type human Nav1.7 and erythromelgia mutant channel L858H. *J Neurophysiol* 2014;111:1429-43.
169. Bendahhou S, Cummins TR, Tawil R, Waxman SG, Ptáček LJ. Activation and inactivation of the voltage-gated sodium channel: role of segment S5 revealed by a novel hyperkalaemic periodic paralysis mutation. *J Neurosci* 1999;19:4762-71.
170. Huang S, Zhang W, Chang X, Guo J. Overlap of periodic paralysis and paramyotonia congenita caused by SCN4A gene mutations two family reports and literature review. *Channels (Austin)* 2019;13:110-9.
171. Harty TP, Dib-Hajj SD, Tyrrell L, et al. Na(V)1.7 mutant A863P in erythromelgia: effects of altered activation and steady-state inactivation on excitability of nociceptive dorsal root ganglion neurons. *J Neurosci* 2006;26:12566-75.
172. Rhodes TH, Lossin C, Vanoye CG, Wang DW, George AL, Jr. Noninactivating voltage-gated sodium channels in severe myoclonic epilepsy of infancy. *Proc Natl Acad Sci U S A* 2004;101:11147-52.
173. Ohmori I, Ouchida M, Ohtsuka Y, Oka E, Shimizu K. Significant correlation of the SCN1A mutations and severe myoclonic epilepsy in infancy. *Biochem Biophys Res Commun* 2002;295:17-23.
174. Choi JS, Zhang L, Dib-Hajj SD, et al. Mexiletine-responsive erythromelgia due to a new Na(v)1.7 mutation showing use-dependent current fall-off. *Exp Neurol* 2009;216:383-9.
175. Stadler T, O'Reilly AO, Lampert A. Erythromelgia mutation Q875E Stabilizes the activated state of sodium channel Nav1.7. *J Biol Chem* 2015;290:6316-25.
176. Skeik N, Rooke TW, Davis MD, et al. Severe case and literature review of primary erythromelgia: novel SCN9A gene mutation. *Vasc Med* 2012;17:44-9.
177. Cox JJ, Sheynin J, Shorer Z, et al. Congenital insensitivity to pain: novel SCN9A missense and in-frame deletion mutations. *Hum Mutat* 2010;31:E1670-86.
178. Tarradas A, Selga E, Beltran-Alvarez P, et al. A novel missense mutation, I890T, in the pore region of cardiac sodium channel causes Brugada syndrome. *PLoS One* 2013;8:e53220.
179. Savastano S, Rordorf R, Vicentini A, et al. A comprehensive electrocardiographic, molecular, and echocardiographic study of Brugada syndrome: validation of the 2013 diagnostic criteria. *Heart Rhythm* 2014;11:1176-83.
180. Begemann A, Acuna MA, Zweier M, et al. Further corroboration of distinct functional features in SCN2A variants causing intellectual disability or epileptic phenotypes. *Mol Med* 2019;25:6.

181. Rauch A, Wieczorek D, Graf E, et al. Range of genetic mutations associated with severe non-syndromic sporadic intellectual disability: an exome sequencing study. *Lancet* 2012;380:1674-82.
182. Liao WP, Shi YW, Long YS, et al. Partial epilepsy with antecedent febrile seizures and seizure aggravation by antiepileptic drugs: associated with loss of function of Na(v) 1.1. *Epilepsia* 2010;51:1669-78.
183. Pambrun T, Mercier A, Chatelier A, et al. Myotonic dystrophy type 1 mimics and exacerbates Brugada phenotype induced by Nav1.5 sodium channel loss-of-function mutation. *Heart Rhythm* 2014;11:1393-400.
184. Sugawara T, Tsurubuchi Y, Fujiwara T, et al. Nav1.1 channels with mutations of severe myoclonic epilepsy in infancy display attenuated currents. *Epilepsy Res* 2003;54:201-7.
185. Wagnon JL, Barker BS, Ottolini M, et al. Loss-of-function variants of SCN8A in intellectual disability without seizures. *Neurol Genet* 2017;3:e170.
186. Lossin C, Rhodes TH, Desai RR, et al. Epilepsy-associated dysfunction in the voltage-gated neuronal sodium channel SCN1A. *J Neurosci* 2003;23:11289-95.
187. Thompson CH, Porter JC, Kahlig KM, Daniels MA, George AL, Jr. Nontruncating SCN1A mutations associated with severe myoclonic epilepsy of infancy impair cell surface expression. *J Biol Chem* 2012;287:42001-8.
188. Claes L, Del-Favero J, Ceulemans B, Lagae L, Van Broeckhoven C, De Jonghe P. De novo mutations in the sodium-channel gene SCN1A cause severe myoclonic epilepsy of infancy. *Am J Hum Genet* 2001;68:1327-32.
189. Elia N, Nault T, McMillan HJ, Graham GE, Huang L, Cannon SC. Myotonic Myopathy With Secondary Joint and Skeletal Anomalies From the c.2386C>G, p.L769V Mutation in SCN4A. *Front Neurol* 2020;11:77.
190. Ruan Y, Liu N, Bloise R, Napolitano C, Priori SG. Gating properties of SCN5A mutations and the response to mexiletine in long-QT syndrome type 3 patients. *Circulation* 2007;116:1137-44.
191. Schwartz PJ, Priori SG, Dumaine R, et al. A Molecular Link between the Sudden Infant Death Syndrome and the Long-QT Syndrome. *New England Journal of Medicine* 2000;343:262-7.
192. Huang J, Estacion M, Zhao P, et al. A Novel Gain-of-Function Nav1.9 Mutation in a Child With Episodic Pain. *Front Neurosci* 2019;13:918.
193. Miao P, Tang S, Ye J, et al. Electrophysiological features: The next precise step for SCN2A developmental epileptic encephalopathy. *Mol Genet Genomic Med* 2020:e1250.
194. Hsueh CH, Chen WP, Lin JL, et al. Distinct functional defect of three novel Brugada syndrome related cardiac sodium channel mutations. *J Biomed Sci* 2009;16:23.
195. Splawski I, Timothy KW, Tateyama M, et al. Variant of SCN5A sodium channel implicated in risk of cardiac arrhythmia. *Science* 2002;297:1333-6.
196. Plant LD, Bowers PN, Liu Q, et al. A common cardiac sodium channel variant associated with sudden infant death in African Americans, SCN5A S1103Y. *J Clin Invest* 2006;116:430-5.
197. Cestele S, Labate A, Rusconi R, et al. Divergent effects of the T1174S SCN1A mutation associated with seizures and hemiplegic migraine. *Epilepsia* 2013;54:927-35.
198. Estacion M, Harty TP, Choi JS, Tyrrell L, Dib-Hajj SD, Waxman SG. A sodium channel gene SCN9A polymorphism that increases nociceptor excitability. *Ann Neurol* 2009;66:862-6.

199. Winkel BG, Larsen MK, Berge KE, et al. The prevalence of mutations in KCNQ1, KCNH2, and SCN5A in an unselected national cohort of young sudden unexplained death cases. *J Cardiovasc Electrophysiol* 2012;23:1092-8.
200. Escayg A, Heils A, MacDonald BT, Haug K, Sander T, Meisler MH. A Novel SCN1A Mutation Associated with Generalized Epilepsy with Febrile Seizures Plus—and Prevalence of Variants in Patients with Epilepsy. *The American Journal of Human Genetics* 2001;68:866-73.
201. Marini C, Mei D, Temudo T, et al. Idiopathic Epilepsies with Seizures Precipitated by Fever and SCN1A Abnormalities. *Epilepsia* 2007;48:1678-85.
202. Wang Q, Chen S, Chen Q, et al. The common SCN5A mutation R1193Q causes LQTS-type electrophysiological alterations of the cardiac sodium channel. *J Med Genet* 2004;41:e66.
203. Huang H, Zhao J, Barrane FZ, Champagne J, Chahine M. Nav1.5/R1193Q polymorphism is associated with both long QT and Brugada syndromes. *Can J Cardiol* 2006;22:309-13.
204. Abdelsayed M, Peters CH, Ruben PC. Differential thermosensitivity in mixed syndrome cardiac sodium channel mutants. *J Physiol* 2015;593:4201-23.
205. Abe M, Kinoshita K, Matsuoka K, et al. Lack of modulatory effect of the SCN5A R1193Q polymorphism on cardiac fast Na<sup>+</sup> current at body temperature. *PLoS One* 2018;13:e0207437.
206. Li L, Ruan Y, Liu N, et al. "Pill-in-the-Pocket" Treatment of Propafenone Unmasks ECG Brugada Pattern in an Atrial Fibrillation Patient With a Common SCN5A R1193Q Polymorphism. *Front Physiol* 2019;10:353.
207. Takahata T, Yasui-Furukori N, Sasaki S, et al. Nucleotide changes in the translated region of SCN5A from Japanese patients with Brugada syndrome and control subjects. *Life Sci* 2003;72:2391-9.
208. Ogiwara I, Ito K, Sawaishi Y, et al. De novo mutations of voltage-gated sodium channel alphaII gene SCN2A in intractable epilepsies. *Neurology* 2009;73:1046-53.
209. Schulze-Bahr E, Eckardt L, Breithardt G, et al. Sodium channel gene (SCN5A) mutations in 44 index patients with Brugada syndrome: different incidences in familial and sporadic disease. *Hum Mutat* 2003;21:651-2.
210. Crotti L, Marcou CA, Tester DJ, et al. Spectrum and prevalence of mutations involving BrS1- through BrS12-susceptibility genes in a cohort of unrelated patients referred for Brugada syndrome genetic testing: implications for genetic testing. *J Am Coll Cardiol* 2012;60:1410-8.
211. Baroudi G, Acharfi S, Larouche C, Chahine M. Expression and intracellular localization of an SCN5A double mutant R1232W/T1620M implicated in Brugada syndrome. *Circ Res* 2002;90:E11-6.
212. Makita N, Mochizuki N, Tsutsui H. Absence of a trafficking defect in R1232W/T1620M, a double SCN5A mutant responsible for Brugada syndrome. *Circ J* 2008;72:1018-9.
213. Chen Q, Kirsch GE, Zhang D, et al. Genetic basis and molecular mechanism for idiopathic ventricular fibrillation. *Nature* 1998;392:293-6.
214. Peters C, Rosch RE, Hughes E, Ruben PC. Temperature-dependent changes in neuronal dynamics in a patient with an SCN1A mutation and hyperthermia induced seizures. *Sci Rep* 2016;6:31879.
215. Hermida JS, Arnalsteen-Dassonville E, Kubala M, et al. Dual phenotypic transmission in Brugada syndrome. *Arch Cardiovasc Dis* 2013;106:366-72.
216. Zaytseva AK, Karpushev AV, Kiselev AM, et al. Characterization of a novel SCN5A genetic variant A1294G associated with mixed clinical phenotype. *Biochem Biophys Res Commun* 2019;516:777-83.

217. Abriel H, Cabo C, Wehrens XH, et al. Novel arrhythmogenic mechanism revealed by a long-QT syndrome mutation in the cardiac Na<sup>+</sup> channel. *Circ Res* 2001;88:740-5.
218. Huang J, Yang Y, Dib-Hajj SD, et al. Depolarized inactivation overcomes impaired activation to produce DRG neuron hyperexcitability in a Nav1.7 mutation in a patient with distal limb pain. *J Neurosci* 2014;34:12328-40.
219. Olesen MS, Yuan L, Liang B, et al. High prevalence of long QT syndrome-associated SCN5A variants in patients with early-onset lone atrial fibrillation. *Circ Cardiovasc Genet* 2012;5:450-9.
220. Lossin C, Shi X, Rogawski MA, Hirose S. Compromised function in the Na(v)1.2 Dravet syndrome mutation R1312T. *Neurobiol Dis* 2012;47:378-84.
221. Shi X, Yasumoto S, Nakagawa E, Fukasawa T, Uchiya S, Hirose S. Missense mutation of the sodium channel gene SCN2A causes Dravet syndrome. *Brain Dev* 2009;31:758-62.
222. Misra SN, Kahlig KM, George AL, Jr. Impaired Nav1.2 function and reduced cell surface expression in benign familial neonatal-infantile seizures. *Epilepsia* 2008;49:1535-45.
223. Berkovic SF, Heron SE, Giordano L, et al. Benign familial neonatal-infantile seizures: characterization of a new sodium channelopathy. *Ann Neurol* 2004;55:550-7.
224. Casini S, Tan HL, Bhuiyan ZA, et al. Characterization of a novel SCN5A mutation associated with Brugada syndrome reveals involvement of DIIIS4-S5 linker in slow inactivation. *Cardiovasc Res* 2007;76:418-29.
225. Jarecki BW, Sheets PL, Jackson JO, 2nd, Cummins TR. Paroxysmal extreme pain disorder mutations within the D3/S4-S5 linker of Nav1.7 cause moderate destabilization of fast inactivation. *J Physiol* 2008;586:4137-53.
226. Cheng X, Dib-Hajj SD, Tyrrell L, Wright DA, Fischer TZ, Waxman SG. Mutations at opposite ends of the DIII/S4-S5 linker of sodium channel Na V 1.7 produce distinct pain disorders. *Mol Pain* 2010;6:24.
227. Fertleman CR, Baker MD, Parker KA, et al. SCN9A mutations in paroxysmal extreme pain disorder: allelic variants underlie distinct channel defects and phenotypes. *Neuron* 2006;52:767-74.
228. Wang DW, Yazawa K, George AL, Jr., Bennett PB. Characterization of human cardiac Na<sup>+</sup> channel mutations in the congenital long QT syndrome. *Proc Natl Acad Sci U S A* 1996;93:13200-5.
229. Tian XL, Yong SL, Wan X, et al. Mechanisms by which SCN5A mutation N1325S causes cardiac arrhythmias and sudden death in vivo. *Cardiovasc Res* 2004;61:256-67.
230. Li G, Woltz RL, Wang CY, et al. Gating Properties of Mutant Sodium Channels and Responses to Sodium Current Inhibitors Predict Mexiletine-Sensitive Mutations of Long QT Syndrome 3. *Front Pharmacol* 2020;11:1182.
231. Wang Q, Shen J, Li Z, et al. Cardiac sodium channel mutations in patients with long QT syndrome, an inherited cardiac arrhythmia. *Hum Mol Genet* 1995;4:1603-7.
232. Heron SE, Crossland KM, Andermann E, et al. Sodium-channel defects in benign familial neonatal-infantile seizures. *Lancet* 2002;360:851-2.
233. Turker I, Makiyama T, Vatta M, et al. A Novel SCN5A Mutation Associated with Drug Induced Brugada Type ECG. *PLoS One* 2016;11:e0161872.
234. Wedekind H, Smits JP, Schulze-Bahr E, et al. De novo mutation in the SCN5A gene associated with early onset of sudden infant death. *Circulation* 2001;104:1158-64.



235. Berecki G, Zegers JG, Bhuiyan ZA, Verkerk AO, Wilders R, van Ginneken AC. Long-QT syndrome-related sodium channel mutations probed by the dynamic action potential clamp technique. *J Physiol* 2006;570:237-50.
236. Palmio J, Sandell S, Hanna MG, Männikkö R, Penttilä S, Udd B. Predominantly myalgic phenotype caused by the c.3466G>A p.A1156T mutation in SCN4A gene. *Neurology* 2017;88:1520-7.
237. McClatchey AI, McKenna-Yasek D, Cros D, et al. Novel mutations in families with unusual and variable disorders of the skeletal muscle sodium channel. *Nat Genet* 1992;2:148-52.
238. Smits JP, Veldkamp MW, Bezzina CR, et al. Substitution of a conserved alanine in the domain IIIIS4-S5 linker of the cardiac sodium channel causes long QT syndrome. *Cardiovasc Res* 2005;67:459-66.
239. Desaphy JF, Carbonara R, D'Amico A, et al. Translational approach to address therapy in myotonia permanens due to a new SCN4A mutation. *Neurology* 2016;86:2100-8.
240. Schulze-Bahr E, Fenge H, Etzrodt D, et al. Long QT syndrome and life threatening arrhythmia in a newborn: molecular diagnosis and treatment response. *Heart* 2004;90:13-6.
241. Sugiura Y, Makita N, Li L, et al. Cold induces shifts of voltage dependence in mutant SCN4A, causing hypokalemic periodic paralysis. *Neurology* 2003;61:914-8.
242. Webb J, Cannon SC. Cold-induced defects of sodium channel gating in atypical periodic paralysis plus myotonia. *Neurology* 2008;70:755-61.
243. Huang H, Millat G, Rodriguez-Lafrasse C, et al. Biophysical characterization of a new SCN5A mutation S1333Y in a SIDS infant linked to long QT syndrome. *FEBS Lett* 2009;583:890-6.
244. Barker BS, Ottolini M, Wagnon JL, Hollander RM, Meisler MH, Patel MK. The SCN8A encephalopathy mutation p.Ile1327Val displays elevated sensitivity to the anticonvulsant phenytoin. *Epilepsia* 2016;57:1458-66.
245. Vaher U, Noukas M, Nikopentis T, et al. De novo SCN8A mutation identified by whole-exome sequencing in a boy with neonatal epileptic encephalopathy, multiple congenital anomalies, and movement disorders. *J Child Neurol* 2014;29:NP202-6.
246. Singh R, Jayapal S, Goyal S, Jungbluth H, Lascelles K. Early-onset movement disorder and epileptic encephalopathy due to de novo dominant SCN8A mutation. *Seizure* 2015;26:69-71.
247. Patel RR, Barbosa C, Brustovetsky T, Brustovetsky N, Cummins TR. Aberrant epilepsy-associated mutant Nav1.6 sodium channel activity can be targeted with cannabidiol. *Brain* 2016;139:2164-81.
248. Carvill GL, Heavin SB, Yendle SC, et al. Targeted resequencing in epileptic encephalopathies identifies de novo mutations in CHD2 and SYNGAP1. *Nat Genet* 2013;45:825-30.
249. Hackenberg A, Baumer A, Sticht H, et al. Infantile epileptic encephalopathy, transient choreoathetotic movements, and hypersomnia due to a De Novo missense mutation in the SCN2A gene. *Neuropediatrics* 2014;45:261-4.
250. Matalon D, Goldberg E, Medne L, Marsh ED. Confirming an expanded spectrum of SCN2A mutations: a case series. *Epileptic Disord* 2014;16:13-8.
251. Dimassi S, Labalme A, Ville D, et al. Whole-exome sequencing improves the diagnosis yield in sporadic infantile spasm syndrome. *Clin Genet* 2016;89:198-204.
252. Wu MT, Huang PY, Yen CT, Chen CC, Lee MJ. A novel SCN9A mutation responsible for primary erythromelalgia and is resistant to the treatment of sodium channel blockers. *PLoS One* 2013;8:e55212.

253. Estacion M, Yang Y, Dib-Hajj SD, et al. A new Nav1.7 mutation in an erythromelalgia patient. *Biochem Biophys Res Commun* 2013;432:99-104.
254. Huang CW, Lai HJ, Huang PY, Lee MJ, Kuo CC. The Biophysical Basis Underlying Gating Changes in the p.V1316A Mutant Nav1.7 Channel and the Molecular Pathogenesis of Inherited Erythromelalgia. *PLoS Biol* 2016;14:e1002561.
255. Leipold E, Hanson-Kahn A, Frick M, et al. Cold-aggravated pain in humans caused by a hyperactive Nav1.9 channel mutant. *Nat Commun* 2015;6:10049.
256. Samani K, Wu G, Ai T, et al. A novel SCN5A mutation V1340I in Brugada syndrome augmenting arrhythmias during febrile illness. *Heart Rhythm* 2009;6:1318-26.
257. Wallace RH, Scheffer IE, Barnett S, et al. Neuronal sodium-channel alpha1-subunit mutations in generalized epilepsy with febrile seizures plus. *Am J Hum Genet* 2001;68:859-65.
258. Keller DI, Huang H, Zhao J, et al. A novel SCN5A mutation, F1344S, identified in a patient with Brugada syndrome and fever-induced ventricular fibrillation. *Cardiovasc Res* 2006;70:521-9.
259. Lee YS, Baek JS, Kim SY, et al. Childhood brugada syndrome in two korean families. *Korean Circ J* 2010;40:143-7.
260. Osaka H, Ogiwara I, Mazaki E, et al. Patients with a sodium channel alpha 1 gene mutation show wide phenotypic variation. *Epilepsy Res* 2007;75:46-51.
261. Rudnik-Schöneborn S, Schaupp M, Lindner A, et al. Brugada-like cardiac disease in myotonic dystrophy type 2: report of two unrelated patients. *Eur J Neurol* 2011;18:191-4.
262. Zumhagen S, Zeidler EM, Stallmeyer B, Ernsting M, Eckardt L, Schulze-Bahr E. Tpeak-Tend interval and Tpeak-Tend/QT ratio in patients with Brugada syndrome. *Europace* 2016;18:1866-72.
263. Tan BH, Valdivia CR, Song C, Makielski JC. Partial expression defect for the SCN5A missense mutation G1406R depends on splice variant background Q1077 and rescue by mexiletine. *Am J Physiol Heart Circ Physiol* 2006;291:H1822-8.
264. Kyndt F, Probst V, Potet F, et al. Novel SCN5A mutation leading either to isolated cardiac conduction defect or Brugada syndrome in a large French family. *Circulation* 2001;104:3081-6.
265. Kim HW, Quan Z, Kim YB, et al. Differential effects on sodium current impairments by distinct SCN1A mutations in GABAergic neurons derived from Dravet syndrome patients. *Brain Dev* 2018;40:287-98.
266. Hermida JS, Dassonville E, Six I, et al. Prospective evaluation of the familial prevalence of the brugada syndrome. *Am J Cardiol* 2010;106:1758-62.
267. Zhu JF, Du LL, Tian Y, et al. Novel heterozygous mutation c.4282G>T in the SCN5A gene in a family with Brugada syndrome. *Exp Ther Med* 2015;9:1639-45.
268. Maury P, Moreau A, Hidden-Lucet F, et al. Novel SCN5A mutations in two families with "Brugada-like" ST elevation in the inferior leads and conduction disturbances. *J Interv Card Electrophysiol* 2013;37:131-40.
269. Deschenes I, Baroudi G, Berthet M, et al. Electrophysiological characterization of SCN5A mutations causing long QT (E1784K) and Brugada (R1512W and R1432G) syndromes. *Cardiovasc Res* 2000;46:55-65.
270. Hothi SS, Ara F, Timperley J. p.Y1449C SCN5A mutation associated with overlap disorder comprising conduction disease, Brugada syndrome, and atrial flutter. *J Cardiovasc Electrophysiol* 2015;26:93-7.
271. Sacilotto L, Epifanio HB, Darrieux FC, et al. Compound Heterozygous SCN5A Mutations in a Toddler - Are they Associated with a More Severe Phenotype? *Arq Bras Cardiol* 2017;108:70-3.

272. Farinato A, Altamura C, Imbrici P, et al. Pharmacogenetics of myotonic hNav1.4 sodium channel variants situated near the fast inactivation gate. *Pharmacol Res* 2019;141:224-35.
273. Koch MC, Baumbach K, George AL, Ricker K. Paramyotonia congenita without paralysis on exposure to cold: a novel mutation in the SCN4A gene (Val1293Ile). *Neuroreport* 1995;6:2001-4.
274. Gay S, Dupuis D, Faivre L, et al. Severe neonatal non-dystrophic myotonia secondary to a novel mutation of the voltage-gated sodium channel (SCN4A) gene. *Am J Med Genet A* 2008;146a:380-3.
275. Maggi L, Ravaglia S, Farinato A, et al. Coexistence of CLCN1 and SCN4A mutations in one family suffering from myotonia. *Neurogenetics* 2017;18:219-25.
276. Bankston JR, Yue M, Chung W, et al. A novel and lethal de novo LQT-3 mutation in a newborn with distinct molecular pharmacology and therapeutic response. *PLoS One* 2007;2:e1258.
277. Cai ZQ, Li WP, Chen X, et al. [The reverse effects of allitridum on sodium current decrease caused by SCN5A-F1473S mutation]. *Yao Xue Xue Bao* 2016;51:1852-7.
278. Ruan Y, Denegri M, Liu N, et al. Trafficking Defects and Gating Abnormalities of a Novel *SCN5A* Mutation Question Gene-Specific Therapy in Long QT Syndrome Type 3. *Circulation Research* 2010;106:1374-83.
279. Dib-Hajj SD, Rush AM, Cummins TR, et al. Gain-of-function mutation in Nav1.7 in familial erythromelalgia induces bursting of sensory neurons. *Brain* 2005;128:1847-54.
280. Gurkiewicz M, Korngreen A, Waxman SG, Lampert A. Kinetic modeling of Nav1.7 provides insight into erythromelalgia-associated F1449V mutation. *J Neurophysiol* 2011;105:1546-57.
281. Gando I, Campana C, Tan RB, Cecchin F, Sobie EA, Coetzee WA. A distinct molecular mechanism by which phenytoin rescues a novel long QT 3 variant. *J Mol Cell Cardiol* 2020;144:1-11.
282. Tan RB, Chakravarti S, Busovsky-McNeal M, Walsh A, Cecchin F. Complexity of ranolazine and phenytoin use in an infant with long QT syndrome type 3. *HeartRhythm Case Rep* 2017;3:104-8.
283. Barbieri R, Bertelli S, Pusch M, Gavazzo P. Late sodium current blocker GS967 inhibits persistent currents induced by familial hemiplegic migraine type 3 mutations of the SCN1A gene. *J Headache Pain* 2019;20:107.
284. Vahedi K, Depienne C, Le Fort D, et al. Elicited repetitive daily blindness. <span class="subtitle">A new phenotype associated with hemiplegic migraine and *SCN1A* mutations</span> 2009;72:1178-83.
285. Cestele S, Scalmani P, Rusconi R, Terragni B, Franceschetti S, Mantegazza M. Self-limited hyperexcitability: functional effect of a familial hemiplegic migraine mutation of the Nav1.1 (SCN1A) Na<sup>+</sup> channel. *J Neurosci* 2008;28:7273-83.
286. Moreau A, Krahn AD, Gosselin-Badaroudine P, et al. Sodium overload due to a persistent current that attenuates the arrhythmogenic potential of a novel LQT3 mutation. *Front Pharmacol* 2013;4:126.
287. Lerche H, Heine R, Pika U, et al. Human sodium channel myotonia: slowed channel inactivation due to substitutions for a glycine within the III-IV linker. *J Physiol* 1993;470:13-22.
288. Liu Y, Schubert J, Sonnenberg L, et al. Neuronal mechanisms of mutations in SCN8A causing epilepsy or intellectual disability. *Brain* 2019;142:376-90.
289. Parrini E, Marini C, Mei D, et al. Diagnostic Targeted Resequencing in 349 Patients with Drug-Resistant Pediatric Epilepsies Identifies Causative Mutations in 30 Different Genes. *Hum Mutat* 2017;38:216-25.

290. Wang J, Gao H, Bao X, et al. SCN8A mutations in Chinese patients with early onset epileptic encephalopathy and benign infantile seizures. *BMC Med Genet* 2017;18:104.
291. Xiao Y, Xiong J, Mao D, et al. Early-onset epileptic encephalopathy with de novo SCN8A mutation. *Epilepsy Res* 2018;139:9-13.
292. Gardella E, Marini C, Trivisano M, et al. The phenotype of SCN8A developmental and epileptic encephalopathy. *Neurology* 2018;91:e1112-e24.
293. Weller CM, Pelzer N, de Vries B, et al. Two novel SCN1A mutations identified in families with familial hemiplegic migraine. *Cephalalgia* 2014;34:1062-9.
294. Domitrz I, Kosiorek M, Żekanowski C, Kamińska A. Genetic studies of Polish migraine patients: screening for causative mutations in four migraine-associated genes. *Hum Genomics* 2016;10:3.
295. Bouhours M, Sternberg D, Davoine CS, et al. Functional characterization and cold sensitivity of T1313A, a new mutation of the skeletal muscle sodium channel causing paramyotonia congenita in humans. *J Physiol* 2004;554:635-47.
296. Saber S, Amarouch MY, Fazelifar AF, et al. Complex genetic background in a large family with Brugada syndrome. *Physiol Rep* 2015;3.
297. Zheng J, Zhou F, Su T, et al. The biophysical characterization of the first SCN5A mutation R1512W identified in Chinese sudden unexplained nocturnal death syndrome. *Medicine (Baltimore)* 2016;95:e3836.
298. Dharmawan T, Nakajima T, Iizuka T, et al. Enhanced closed-state inactivation of mutant cardiac sodium channels (SCN5A N1541D and R1632C) through different mechanisms. *J Mol Cell Cardiol* 2019;130:88-95.
299. Ke Q, Ye J, Tang S, et al. N1366S mutation of human skeletal muscle sodium channel causes paramyotonia congenita. *J Physiol* 2017;595:6837-50.
300. Lewis TB, Shevell MI, Andermann E, Ryan SG, Leach RJ. Evidence of a third locus for benign familial convulsions. *J Child Neurol* 1996;11:211-4.
301. Cregg R, Laguda B, Werdehausen R, et al. Novel mutations mapping to the fourth sodium channel domain of Nav1.7 result in variable clinical manifestations of primary erythromelalgia. *Neuromolecular Med* 2013;15:265-78.
302. Ohmori I, Ouchida M, Kobayashi K, et al. Rasmussen encephalitis associated with SCN 1 A mutation. *Epilepsia* 2008;49:521-6.
303. Harkin LA, McMahon JM, Iona X, et al. The spectrum of SCN1A-related infantile epileptic encephalopathies. *Brain* 2007;130:843-52.
304. Kim YO, Bellows S, McMahon JM, et al. Atypical multifocal Dravet syndrome lacks generalized seizures and may show later cognitive decline. *Dev Med Child Neurol* 2014;56:85-90.
305. Lauxmann S, Boutry-Kryza N, Rivier C, et al. An SCN2A mutation in a family with infantile seizures from Madagascar reveals an increased subthreshold Na<sup>(+)</sup> current. *Epilepsia* 2013;54:e117-21.
306. Wang DW, Viswanathan PC, Balsler JR, George AL, Jr., Benson DW. Clinical, genetic, and biophysical characterization of SCN5A mutations associated with atrioventricular conduction block. *Circulation* 2002;105:341-6.
307. Fan C, Wolking S, Lehmann-Horn F, et al. Early-onset familial hemiplegic migraine due to a novel SCN1A mutation. *Cephalalgia* 2016;36:1238-47.

308. Surber R, Hensellek S, Prochnau D, et al. Combination of cardiac conduction disease and long QT syndrome caused by mutation T1620K in the cardiac sodium channel. *Cardiovasc Res* 2008;77:740-8.
309. Wang DW, Makita N, Kitabatake A, Balsler JR, George AL, Jr. Enhanced Na(+) channel intermediate inactivation in Brugada syndrome. *Circ Res* 2000;87:E37-43.
310. Kambouris NG, Nuss HB, Johns DC, Tomaselli GF, Marban E, Balsler JR. Phenotypic characterization of a novel long-QT syndrome mutation (R1623Q) in the cardiac sodium channel. *Circulation* 1998;97:640-4.
311. Tsurugi T, Nagatomo T, Abe H, et al. Differential modulation of late sodium current by protein kinase A in R1623Q mutant of LQT3. *Life Sci* 2009;84:380-7.
312. Kambouris NG, Nuss HB, Johns DC, Marban E, Tomaselli GF, Balsler JR. A revised view of cardiac sodium channel "blockade" in the long-QT syndrome. *J Clin Invest* 2000;105:1133-40.
313. Miura M, Yamagishi H, Morikawa Y, Matsuoka R. Congenital long QT syndrome and 2:1 atrioventricular block with a mutation of the SCN5A gene. *Pediatr Cardiol* 2003;24:70-2.
314. Wagnon JL, Barker BS, Hounshell JA, et al. Pathogenic mechanism of recurrent mutations of SCN8A in epileptic encephalopathy. *Ann Clin Transl Neurol* 2016;3:114-23.
315. Ohba C, Kato M, Takahashi S, et al. Early onset epileptic encephalopathy caused by de novo SCN8A mutations. *Epilepsia* 2014;55:994-1000.
316. Kong W, Zhang Y, Gao Y, et al. SCN8A mutations in Chinese children with early onset epilepsy and intellectual disability. *Epilepsia* 2015;56:431-8.
317. Larsen J, Carvill GL, Gardella E, et al. The phenotypic spectrum of SCN8A encephalopathy. *Neurology* 2015;84:480-9.
318. Poulin H, Gosselin-Badaroudine P, Vicart S, et al. Substitutions of the S4DIV R2 residue (R1451) in Na(V)1.4 lead to complex forms of paramyotonia congenita and periodic paralyses. *Sci Rep* 2018;8:2041.
319. Zeng Z, Zhou J, Hou Y, et al. Electrophysiological characteristics of a SCN5A voltage sensors mutation R1629Q associated with Brugada syndrome. *PLoS One* 2013;8:e78382.
320. Habbout K, Poulin H, Rivier F, et al. A recessive Nav1.4 mutation underlies congenital myasthenic syndrome with periodic paralysis. *Neurology* 2016;86:161-9.
321. Bednarz M, Stunnenberg BC, Kusters B, et al. A novel Ile1455Thr variant in the skeletal muscle sodium channel alpha-subunit in a patient with a severe adult-onset proximal myopathy with electrical myotonia and a patient with mild paramyotonia phenotype. *Neuromuscul Disord* 2017;27:175-82.
322. Wang DW, Crotti L, Shimizu W, et al. Malignant perinatal variant of long-QT syndrome caused by a profoundly dysfunctional cardiac sodium channel. *Circ Arrhythm Electrophysiol* 2008;1:370-8.
323. Choi JS, Boralevi F, Brissaud O, et al. Paroxysmal extreme pain disorder: a molecular lesion of peripheral neurons. *Nat Rev Neurol* 2011;7:51-5.
324. Nakajima T, Kaneko Y, Saito A, Ota M, Iijima T, Kurabayashi M. Enhanced fast-inactivated state stability of cardiac sodium channels by a novel voltage sensor SCN5A mutation, R1632C, as a cause of atypical Brugada syndrome. *Heart Rhythm* 2015;12:2296-304.
325. García-Molina E, Sabater-Molina M, Muñoz C, Ruiz-Espejo F, Gimeno JR. An R1632C variant in the SCN5A gene causing Brugada syndrome. *Mol Med Rep* 2016;13:4677-80.

326. Arnold WD, Feldman DH, Ramirez S, et al. Defective fast inactivation recovery of Nav 1.4 in congenital myasthenic syndrome. *Ann Neurol* 2015;77:840-50.
327. Benson DW, Wang DW, Dymment M, et al. Congenital sick sinus syndrome caused by recessive mutations in the cardiac sodium channel gene (SCN5A). *J Clin Invest* 2003;112:1019-28.
328. Robyns T, Nuyens D, Van Casteren L, et al. Reduced Penetrance and Variable Expression of SCN5A Mutations and the Importance of Co-inherited Genetic Variants: Case Report and Review of the Literature. *Indian Pacing Electrophysiol J* 2014;14:133-49.
329. Vanoye CG, Lossin C, Rhodes TH, George AL, Jr. Single-channel properties of human Nav1.1 and mechanism of channel dysfunction in SCN1A-associated epilepsy. *J Gen Physiol* 2006;127:1-14.
330. Kahlig KM, Lepist I, Leung K, Rajamani S, George AL. Ranolazine selectively blocks persistent current evoked by epilepsy-associated Nav1.1 mutations. *Br J Pharmacol* 2010;161:1414-26.
331. Elia N, Palmio J, Castañeda MS, et al. Myasthenic congenital myopathy from recessive mutations at a single residue in Na(V)1.4. *Neurology* 2019;92:e1405-e15.
332. Suter MR, Bhuiyan ZA, Laedermann CJ, et al. p.L1612P, a novel voltage-gated sodium channel Nav1.7 mutation inducing a cold sensitive paroxysmal extreme pain disorder. *Anesthesiology* 2015;122:414-23.
333. Cestèle S, Schiavon E, Rusconi R, Franceschetti S, Mantegazza M. Nonfunctional Nav1.1 familial hemiplegic migraine mutant transformed into gain of function by partial rescue of folding defects. *Proc Natl Acad Sci USA* 2013;110:17546-51.
334. Liu SZ, P. Altered PKA modulation in the Na(v)1.1 epilepsy variant I1656M. *J Neurophysiol* 2013;110:2090-8.
335. Nieto-Marin P, Jimenez-Jaimez J, Tinaquero D, et al. Digenic Heterozygosity in SCN5A and CACNA1C Explains the Variable Expressivity of the Long QT Phenotype in a Spanish Family. *Rev Esp Cardiol (Engl Ed)* 2019;72:324-32.
336. Fleischhauer R, Mitrovic N, Deymeer F, Lehmann-Horn F, Lerche H. Effects of temperature and mexiletine on the F1473S Na<sup>+</sup> channel mutation causing paramyotonia congenita. *Pflugers Arch* 1998;436:757-65.
337. Depienne C, Trouillard O, Gourfinkel-An I, et al. Mechanisms for variable expressivity of inherited SCN1A mutations causing Dravet syndrome. *J Med Genet* 2010;47:404-10.
338. Dib-Hajj SD, Estacion M, Jarecki BW, et al. Paroxysmal extreme pain disorder M1627K mutation in human Nav1.7 renders DRG neurons hyperexcitable. *Mol Pain* 2008;4:37.
339. Kim HJ, Kim BG, Park JE, et al. Characterization of a novel LQT3 variant with a selective efficacy of mexiletine treatment. *Sci Rep* 2019;9:12997.
340. Estacion M, Dib-Hajj SD, Benke PJ, et al. Nav1.7 gain-of-function mutations as a continuum: A1632E displays physiological changes associated with erythromelalgia and paroxysmal extreme pain disorder mutations and produces symptoms of both disorders. *J Neurosci* 2008;28:11079-88.
341. Rühlmann AH, Körner J, Hausmann R, et al. Uncoupling sodium channel dimers restores the phenotype of a pain-linked Na(v) 1.7 channel mutation. *Br J Pharmacol* 2020;177:4481-96.
342. Yang Y, Huang J, Mis MA, et al. Nav1.7-A1632G Mutation from a Family with Inherited Erythromelalgia: Enhanced Firing of Dorsal Root Ganglia Neurons Evoked by Thermal Stimuli. *J Neurosci* 2016;36:7511-22.
343. Eberhardt M, Nakajima J, Klinger AB, et al. Inherited pain: sodium channel Nav1.7 A1632T mutation causes erythromelalgia due to a shift of fast inactivation. *J Biol Chem* 2014;289:1971-80.

344. Bertelli S, Barbieri R, Pusch M, Gavazzo P. Gain of function of sporadic/familial hemiplegic migraine-causing SCN1A mutations: Use of an optimized cDNA. *Cephalalgia* 2019;39:477-88.
345. Dhifallah S, Lancaster E, Merrill S, Leroudier N, Mantegazza M, Cestele S. Gain of Function for the SCN1A/hNav1.1-L1670W Mutation Responsible for Familial Hemiplegic Migraine. *Front Mol Neurosci* 2018;11:232.
346. Nakajima T, Dharmawan T, Kawabata-Iwakawa R, et al. Biophysical defects of an SCN5A V1667I mutation associated with epinephrine-induced marked QT prolongation. *J Cardiovasc Electrophysiol* 2020.
347. Sugiura Y, Ogiwara I, Hoshi A, Yamakawa K, Ugawa Y. Different degrees of loss of function between GEFS+ and SMEI Nav 1.1 missense mutants at the same residue induced by rescuable folding defects. *Epilepsia* 2012;53:e111-4.
348. Sugawara T, Mazaki-Miyazaki E, Ito M, et al. Nav1.1 mutations cause febrile seizures associated with afebrile partial seizures. *Neurology* 2001;57:703-5.
349. Kaluza L, Meents JE, Hampl M, et al. Loss-of-function of Nav1.8/D1639N linked to human pain can be rescued by lidocaine. *Pflugers Arch* 2018;470:1787-801.
350. Dabby R, Sadeh M, Broitman Y, Yosovich K, Dickman R, Leshinsky-Silver E. Painful small fiber neuropathy with gastroparesis: A new phenotype with a novel mutation in the SCN10A gene. *J Clin Neurosci* 2016;26:84-8.
351. Zeng Z, Xie Q, Huang Y, Zhao Y, Li W, Huang Z. p.D1690N sodium voltage-gated channel alpha subunit 5 mutation reduced sodium current density and is associated with Brugada syndrome. *Mol Med Rep* 2016;13:5216-22.
352. Nunez L, Barana A, Amoros I, et al. p.D1690N Nav1.5 rescues p.G1748D mutation gating defects in a compound heterozygous Brugada syndrome patient. *Heart Rhythm* 2013;10:264-72.
353. Lakshmanadoss U, Mertens A, Gallagher M, Kutinsky I, Williamson B. Sudden cardiac arrest due to a single sodium channel mutation producing a mixed phenotype of Brugada and Long QT3 syndromes. *Indian Pacing Electrophysiol J* 2016;16:66-9.
354. Chen YY, Liu SR, Xie LZ, et al. [Functional analysis of a novel SCN5A mutation G1712C identified in Brugada syndrome]. *Nan Fang Yi Ke Da Xue Xue Bao* 2016;37:256-60.
355. Han C, Vasylyev D, Macala LJ, et al. The G1662S Nav1.8 mutation in small fibre neuropathy: impaired inactivation underlying DRG neuron hyperexcitability. *J Neurol Neurosurg Psychiatry* 2014;85:499-505.
356. Amin AS, Verkerk AO, Bhuiyan ZA, Wilde AA, Tan HL. Novel Brugada syndrome-causing mutation in ion-conducting pore of cardiac Na<sup>+</sup> channel does not affect ion selectivity properties. *Acta Physiol Scand* 2005;185:291-301.
357. Baroudi G, Napolitano C, Priori SG, Del Bufalo A, Chahine M. Loss of function associated with novel mutations of the SCN5A gene in patients with Brugada syndrome. *Can J Cardiol* 2004;20:425-30.
358. Valdivia CR, Tester DJ, Rok BA, et al. A trafficking defective, Brugada syndrome-causing SCN5A mutation rescued by drugs. *Cardiovasc Res* 2004;62:53-62.
359. Huang J, Yang Y, Zhao P, et al. Small-fiber neuropathy Nav1.8 mutation shifts activation to hyperpolarized potentials and increases excitability of dorsal root ganglion neurons. *J Neurosci* 2013;33:14087-97.
360. Chastan N, Lebas A, Legoff F, Parain D, Guyant-Marechal L. Clinical and electroencephalographic abnormalities during the full duration of a sporadic hemiplegic migraine attack. *Neurophysiol Clin* 2016;46:307-11.
361. Chang CC, Acharfi S, Wu MH, et al. A novel SCN5A mutation manifests as a malignant form of long QT syndrome with perinatal onset of tachycardia/bradycardia. *Cardiovasc Res* 2004;64:268-78.

362. Valdivia CR, Ackerman MJ, Tester DJ, et al. A novel SCN5A arrhythmia mutation, M1766L, with expression defect rescued by mexiletine. *Cardiovasc Res* 2002;55:279-89.
363. Huang H, Priori SG, Napolitano C, O'Leary ME, Chahine M. Y1767C, a novel SCN5A mutation, induces a persistent Na<sup>+</sup> current and potentiates ranolazine inhibition of Nav1.5 channels. *Am J Physiol Heart Circ Physiol* 2011;300:H288-99.
364. Rivolta I, Clancy CE, Tateyama M, Liu H, Priori SG, Kass RS. A novel SCN5A mutation associated with long QT-3: altered inactivation kinetics and channel dysfunction. *Physiol Genomics* 2002;10:191-7.
365. Clancy CE, Tateyama M, Liu H, Wehrens XH, Kass RS. Non-equilibrium gating in cardiac Na<sup>+</sup> channels: an original mechanism of arrhythmia. *Circulation* 2003;107:2233-7.
366. Veeramah KR, O'Brien JE, Meisler MH, et al. De novo pathogenic SCN8A mutation identified by whole-genome sequencing of a family quartet affected by infantile epileptic encephalopathy and SUDEP. *Am J Hum Genet* 2012;90:502-10.
367. Baker EM, Thompson CH, Hawkins NA, et al. The novel sodium channel modulator GS-458967 (GS967) is an effective treatment in a mouse model of SCN8A encephalopathy. *Epilepsia* 2018;59:1166-76.
368. Neubauer J, Wang Z, Rougier JS, et al. Functional characterization of a novel SCN5A variant associated with long QT syndrome and sudden cardiac death. *Int J Legal Med* 2019;133:1733-42.
369. Abdelsayed M, Baruteau AE, Gibbs K, et al. Differential calcium sensitivity in Nav 1.5 mixed syndrome mutants. *J Physiol* 2017;595:6165-86.
370. Abdelsayed M, Ruprai M, Ruben PC. The efficacy of Ranolazine on E1784K is altered by temperature and calcium. *Sci Rep* 2018;8:3643.
371. Takahashi K, Shimizu W, Miyake A, Nabeshima T, Nakayashiro M, Ganaha H. High prevalence of the SCN5A E1784K mutation in school children with long QT syndrome living on the Okinawa islands. *Circulation Journal* 2014:CJ-13-1516.
372. Hu RM, Tan BH, Tester DJ, et al. Arrhythmogenic Biophysical Phenotype for SCN5A Mutation S1787N Depends upon Splice Variant Background and Intracellular Acidosis. *PLoS One* 2015;10:e0124921.
373. Splawski I, Shen J, Timothy KW, et al. Spectrum of mutations in long-QT syndrome genes. KVLQT1, HERG, SCN5A, KCNE1, and KCNE2. *Circulation* 2000;102:1178-85.
374. An RH, Wang XL, Kerem B, et al. Novel LQT-3 mutation affects Na<sup>+</sup> channel activity through interactions between alpha- and beta1-subunits. *Circ Res* 1998;83:141-6.
375. Wehrens XH, Abriel H, Cabo C, Benhorin J, Kass RS. Arrhythmogenic mechanism of an LQT-3 mutation of the human heart Na(+) channel alpha-subunit: A computational analysis. *Circulation* 2000;102:584-90.
376. Baroudi G, Chahine M. Biophysical phenotypes of SCN5A mutations causing long QT and Brugada syndromes. *FEBS Lett* 2000;487:224-8.
377. Benhorin J, Goldmit M, MacCluer JW, et al. Identification of a new SCN5A mutation, D1840G, associated with the long QT syndrome. *Mutations in brief no. 153*. Online. *Hum Mutat* 1998;12:72.
378. Blich M, Efrati E, Marai I, Suleiman M, Gepstein L, Boulous M. Novel Clinical Manifestation of the Known SCN5A D1790G Mutation. *Cardiology* 2015;132:228-32.
379. Rivolta I, Abriel H, Tateyama M, et al. Inherited Brugada and long QT-3 syndrome mutations of a single residue of the cardiac sodium channel confer distinct channel and clinical phenotypes. *J Biol Chem* 2001;276:30623-30.



380. Fredj S, Sampson KJ, Liu H, Kass RS. Molecular basis of ranolazine block of LQT-3 mutant sodium channels: evidence for site of action. *Br J Pharmacol* 2006;148:16-24.
381. Benito B, Brugada R, Perich RM, et al. A mutation in the sodium channel is responsible for the association of long QT syndrome and familial atrial fibrillation. *Heart Rhythm* 2008;5:1434-40.
382. Papuc SM, Abela L, Steindl K, et al. The role of recessive inheritance in early-onset epileptic encephalopathies: a combined whole-exome sequencing and copy number study. *Eur J Hum Genet* 2019;27:408-21.
383. Kubota T, Kinoshita M, Sasaki R, et al. New mutation of the Na channel in the severe form of potassium-aggravated myotonia. *Muscle Nerve* 2009;39:666-73.
384. Liu K, Yang T, Viswanathan PC, Roden DM. New mechanism contributing to drug-induced arrhythmia: rescue of a misprocessed LQT3 mutant. *Circulation* 2005;112:3239-46.
385. Makita N, Horie M, Nakamura T, et al. Drug-induced long-QT syndrome associated with a subclinical SCN5A mutation. *Circulation* 2002;106:1269-74.
386. Gando I, Morganstein J, Jana K, McDonald TV, Tang Y, Coetzee WA. Infant sudden death: Mutations responsible for impaired Nav1.5 channel trafficking and function. *Pacing Clin Electrophysiol* 2017;40:703-12.
387. Rusconi R, Scalmani P, Cassulini RR, et al. Modulatory proteins can rescue a trafficking defective epileptogenic Nav1.1 Na<sup>+</sup> channel mutant. *J Neurosci* 2007;27:11037-46.
388. Petitprez S, Jespersen T, Pruvot E, et al. Analyses of a novel SCN5A mutation (C1850S): conduction vs. repolarization disorder hypotheses in the Brugada syndrome. *Cardiovasc Res* 2008;78:494-504.
389. Spampinato J, Kearney JA, de Haan G, et al. A novel epilepsy mutation in the sodium channel SCN1A identifies a cytoplasmic domain for beta subunit interaction. *J Neurosci* 2004;24:10022-34.
390. Adney SK, Millichap JJ, DeKeyser JM, Abramova T, Thompson CH, George AL, Jr. Functional and pharmacological evaluation of a novel SCN2A variant linked to early-onset epilepsy. *Ann Clin Transl Neurol* 2020;7:1488-501.
391. Howell KB, McMahan JM, Carvill GL, et al. SCN2A encephalopathy: A major cause of epilepsy of infancy with migrating focal seizures. *Neurology* 2015;85:958-66.
392. Trump N, McTague A, Brittain H, et al. Improving diagnosis and broadening the phenotypes in early-onset seizure and severe developmental delay disorders through gene panel analysis. *J Med Genet* 2016;53:310-7.
393. Atkin TA, Maher CM, Gerlach AC, et al. A comprehensive approach to identifying repurposed drugs to treat SCN8A epilepsy. *Epilepsia* 2018;59:802-13.
394. Gardella E, Becker F, Moller RS, et al. Benign infantile seizures and paroxysmal dyskinesia caused by an SCN8A mutation. *Ann Neurol* 2016;79:428-36.
395. Selga E, Campuzano O, Pinsach-Abuin ML, et al. Comprehensive Genetic Characterization of a Spanish Brugada Syndrome Cohort. *PLoS One* 2015;10:e0132888.
396. Zhang L, Tester DJ, Lang D, et al. Does Sudden Unexplained Nocturnal Death Syndrome Remain the Autopsy-Negative Disorder: A Gross, Microscopic, and Molecular Autopsy Investigation in Southern China. *Mayo Clin Proc* 2016;91:1503-14.
397. Rusconi R, Combi R, Cestele S, et al. A rescuable folding defective Nav1.1 (SCN1A) sodium channel mutant causes GEFS+: common mechanism in Nav1.1 related epilepsies? *Hum Mutat* 2009;30:E747-60.

398. Casini S, Albesa M, Wang Z, et al. Functional Consequences of the SCN5A-p.Y1977N Mutation within the PY Ubiquitylation Motif: Discrepancy between HEK293 Cells and Transgenic Mice. *Int J Mol Sci* 2019;20.
399. Bebarova M, O'Hara T, Geelen JL, et al. Subepicardial phase 0 block and discontinuous transmural conduction underlie right precordial ST-segment elevation by a SCN5A loss-of-function mutation. *Am J Physiol Heart Circ Physiol* 2008;295:H48-58.
400. Arnestad M, Crotti L, Rognum TO, et al. Prevalence of long-QT syndrome gene variants in sudden infant death syndrome. *Circulation* 2007;115:361-7.
401. Shinlapawittayatorn K, Du XX, Liu H, Ficker E, Kaufman ES, Deschênes I. A common SCN5A polymorphism modulates the biophysical defects of SCN5A mutations. *Heart Rhythm* 2011;8:455-62.

## Supplementary Table 2: Corresponding variants, phenotypes, and function across different sodium channels

| Pair | SCN1A Position | Gene/Variant                       | Function                                                                                                      | Phenotype               | Reference*                                              | Corresponding Gene/Variant          | Function                                                                                                             | Phenotype                                                                     | Reference*                                                  |
|------|----------------|------------------------------------|---------------------------------------------------------------------------------------------------------------|-------------------------|---------------------------------------------------------|-------------------------------------|----------------------------------------------------------------------------------------------------------------------|-------------------------------------------------------------------------------|-------------------------------------------------------------|
| 1    | I138V          | <b>SCN4A</b> ;<br>I141V<br>DI S1   | GoF;<br>WCC: Y, ↑I <sub>NaP</sub> ,<br>←V <sub>1/2</sub> Act., no change V <sub>1/2</sub> FI                  | Sodium channel myotonia | Petitprez (2008) <sup>23</sup>                          | <b>SCN9A</b> ;<br>I136V<br>DI S1    | GoF;<br>WCC: Y, ↑I <sub>NaP</sub> ,<br>←V <sub>1/2</sub> Act., no change V <sub>1/2</sub> FI                         | IEM                                                                           | Cheng (2008) <sup>24</sup>                                  |
| 2    | R222W          | <b>SCN4A</b> ;<br>R225W<br>DI S4   | LoF;<br>WCC: Y, ↓CD,<br>→V <sub>1/2</sub> Act.,<br>no change V <sub>1/2</sub> FI                              | Congenital Myopathy     | Zaharieva (2016) <sup>14</sup>                          | <b>SCN5A</b> ;<br>R225W<br>DI S4    | LoF;<br>WCC: Y, ↓↓CD,<br>→V <sub>1/2</sub> Act., →V <sub>1/2</sub> FI                                                | Severe conduction disease                                                     | Bezzina (2003) <sup>45</sup>                                |
| 3    | S243T          | <b>SCN9A</b> ;<br>S241T<br>DI S4-5 | GoF;<br>WCC: Y, ↑I <sub>NaP</sub> ,<br>←V <sub>1/2</sub> Act., no change V <sub>1/2</sub> FI                  | IEM                     | Lampert (2006) <sup>58</sup>                            | <b>SCN10A</b> ;<br>S242T<br>DI S4-5 | GoF;<br>WCC: Y, ←V <sub>1/2</sub> Act.,<br>←V <sub>1/2</sub> FI                                                      | PPN, PDN;<br>carbamazepin e responder                                         | Han (2018) <sup>60</sup>                                    |
| 4    | Q267K          | <b>SCN4A</b> ;<br>Q270K<br>DI S5   | GoF/Mixed;<br>WCC: Y, →V <sub>1/2</sub> Act.,<br>→V <sub>1/2</sub> FI                                         | PMC                     | Carle (2009) <sup>66</sup>                              | <b>SCN5A</b> ;<br>Q270K<br>DI S5    | GoF/Mixed;<br>WCC: Y, ↓CD,<br>↑I <sub>NaP</sub> , →V <sub>1/2</sub> Act.,<br>→V <sub>1/2</sub> FI                    | LQT3/BrS overlap syndrome;<br>ECG: fetal tachycardia/fibrillation<br>TdP, LQT | Calloe (2011) <sup>67</sup>                                 |
| 5    | R377H          | <b>SCN2A</b> ;<br>R379H<br>DI S5-6 | LoF;<br>WCC: None                                                                                             | ASD                     | Ben-Shalom (2017) <sup>5</sup>                          | <b>SCN5A</b> ;<br>R367H<br>DI S5-6  | LoF;<br>WCC: None                                                                                                    | BrS; SCD;<br>ECG: ST elevation                                                | Hong (2004) <sup>83</sup>                                   |
| 6    | N416K          | <b>SCN4A</b> ;<br>N440K<br>DI S6   | GoF;<br>WCC: Y, ↑I <sub>NaP</sub> , no<br>change V <sub>1/2</sub> Act., →V <sub>1/2</sub> FI                  | PMC                     | Lossin (2012) <sup>92</sup>                             | <b>SCN9A</b> ;<br>N395K<br>DI S6    | GoF;<br>WCC: Y, ←V <sub>1/2</sub> Act.,<br>no change V <sub>1/2</sub> FI                                             | IEM                                                                           | Sheets (2007) <sup>41</sup>                                 |
|      |                |                                    |                                                                                                               |                         |                                                         | <b>SCN5A</b> ;<br>N406K<br>DI S6    | GoF/Mixed;<br>WCC: Y, ↓CD,<br>↑I <sub>NaP</sub> , no change V <sub>1/2</sub> Act., no<br>change V <sub>1/2</sub> FI, | LQT3; ECG:<br>TdP, LQT,<br>polymorphic<br>VT,<br>mexiletine<br>responder      | Hu (2018) <sup>93</sup><br>Kato (2014) <sup>94</sup>        |
| 7    | V421M          | <b>SCN4A</b> ;<br>V445M<br>DI S6   | GoF;<br>WCC: Y, ↑I <sub>NaP</sub> ,<br>←V <sub>1/2</sub> Act., ←V <sub>1/2</sub> FI                           | PMC                     | Wang (1999) <sup>97</sup><br>Huang (2020) <sup>98</sup> | <b>SCN5A</b> ;<br>V411M<br>DI S6    | GoF;<br>WCC: Y, ↑CD,<br>↑I <sub>NaP</sub> , ←V <sub>1/2</sub> Act., no<br>change V <sub>1/2</sub> FI                 | LQT3; ECG:<br>neonatal LQT<br>with 2:1<br>block                               | Horne (2011) <sup>100</sup><br>Zhou (2015) <sup>101</sup>   |
|      |                |                                    |                                                                                                               |                         |                                                         | <b>SCN9A</b> ;<br>V400M<br>DI S6    | GoF;<br>WCC: Y, ↑I <sub>NaP</sub> ,<br>←V <sub>1/2</sub> Act., →V <sub>1/2</sub> FI                                  | IEM;<br>carbamazepin<br>e responder                                           | Fischer (2009) <sup>102</sup>                               |
| 8    | T782I          | <b>SCN2A</b> ;<br>T773I<br>D2 S1   | GoF;<br>WCC: Y, no change CD,<br>↑I <sub>NaP</sub> , ←V <sub>1/2</sub> Act., no<br>change V <sub>1/2</sub> FI | DEE, Sz onset<br>1 day  | Lauxmann (2018) <sup>33</sup>                           | <b>SCN8A</b> ;<br>T767I<br>D2 S1    | GoF;<br>WCC: Y, ↓CD,<br>↑I <sub>NaP</sub> , ←V <sub>1/2</sub> Act., no<br>change V <sub>1/2</sub> FI                 | DEE, Sz onset<br>2 weeks                                                      | Pan (2020) <sup>118</sup><br>Estacion (2014) <sup>119</sup> |
| 9    | R859H          | <b>SCN1A</b> ;<br>R859H<br>D2 S4   | LoF/mixed;<br>WCC: Y, ↑I <sub>NaP</sub> ,<br>no change CD, ←V <sub>1/2</sub> Act.,<br>←V <sub>1/2</sub> FI    | GEFS+                   | Volkers (2011) <sup>134</sup>                           | <b>SCN4A</b> ;<br>R669H<br>D2 S4    | LoF/mixed;<br>WCC: Y, ↓CD,<br>no change V <sub>1/2</sub> Act., ←V <sub>1/2</sub> FI                                  | HypoPP                                                                        | Kuzmenkin (2002) <sup>135</sup>                             |
| 10   | R859C          | <b>SCN1A</b> ;<br>R859C<br>D2 S4   | LoF;<br>WCC: Y, ↓CD,<br>no change V <sub>1/2</sub> Act., no<br>change V <sub>1/2</sub> FI                     | EPI                     | Bechi (2015) <sup>124</sup>                             | <b>SCN5A</b> ;<br>R808C<br>D2 S4    | LoF;<br>WCC: Y, ↓CD,<br>no change V <sub>1/2</sub> Act., ←V <sub>1/2</sub> FI                                        | BrS                                                                           | Glazer (2020) <sup>1</sup>                                  |

|    |        |                                             |                                                                                                                            |                                   |                                                                             |                                          |                                                                                                      |                                                                         |                                                                                                       |
|----|--------|---------------------------------------------|----------------------------------------------------------------------------------------------------------------------------|-----------------------------------|-----------------------------------------------------------------------------|------------------------------------------|------------------------------------------------------------------------------------------------------|-------------------------------------------------------------------------|-------------------------------------------------------------------------------------------------------|
| 11 | R862H  | <b>SCN4A</b> ;<br>R672H<br>D2 S4            | LoF;<br>WCC: Y, ↓CD;<br>→V <sub>1/2</sub> Act., ←V <sub>1/2</sub> FI                                                       | Hypo-PP                           | Jurkatt-Rott<br>(2000) <sup>140</sup><br>Kuzmenkin<br>(2002) <sup>135</sup> | <b>SCN5A</b> ;<br>R811H<br>D2 S4         | LoF;<br>WCC: Y, ↓CD;<br>no change V <sub>1/2</sub> Act., ←V <sub>1/2</sub> FI                        | BrS; family<br>history of<br>sudden death,                              | Calloe<br>(2013) <sup>114</sup>                                                                       |
| 12 | R865Q  | <b>SCN4A</b> ;<br>R675Q<br>D2 S4            | Mixed;<br>WCC: Y, no change CD,<br>no change V <sub>1/2</sub> Act., no<br>change V <sub>1/2</sub> FI, ←V <sub>1/2</sub> SI | Potassium<br>sensitive<br>normoPP | Wu (2014) <sup>149</sup>                                                    | <b>SCN5A</b> ;<br>R814Q<br>D2 S4         | Mixed;<br>WCC: Y, no change CD,<br>no change V <sub>1/2</sub> Act., no<br>change V <sub>1/2</sub> FI | LQT3; BrS                                                               | Glazer<br>(2020) <sup>1</sup>                                                                         |
| 13 | I883T  | <b>SCN3A</b> ;<br>I875T<br>D2 S4-5          | GoF;<br>WCC: Y, ↑I <sub>NaP</sub> ,<br>←V <sub>1/2</sub> Act., →V <sub>1/2</sub> FI                                        | EPI/PMG                           | Zaman<br>(2018) <sup>155</sup>                                              | <b>SCN9A</b> ;<br>I848T<br>D2 S4-5       | GoF;<br>WCC: Y, ↑I <sub>NaP</sub> ,<br>←V <sub>1/2</sub> Act., no change V <sub>1/2</sub> FI         | IEM                                                                     | Cummins<br>(2004) <sup>157</sup><br>Namer<br>(2015) <sup>158</sup><br>Theile<br>(2011) <sup>159</sup> |
| 14 | R946C  | <b>SCN1A</b> ;<br>R946C;<br>D2 S5-6         | LoF;<br>WCC: None                                                                                                          | DS                                | Volkers<br>(2011) <sup>134</sup>                                            | <b>SCN2A</b> ;<br>R937C;<br>D2 S5-6      | LoF;<br>WCC: None                                                                                    | ASD                                                                     | Begemann<br>(2019) <sup>180</sup>                                                                     |
| 15 | R946H  | <b>SCN1A</b> ;<br>R946H;<br>D2 S5-6         | LoF;<br>WCC: None                                                                                                          | DS                                | Liao (2010) <sup>182</sup><br>Volkers<br>(2011) <sup>134</sup>              | <b>SCN2A</b> ;<br>R937H;<br>D2 S5-6      | LoF;<br>WCC: None                                                                                    | ASD                                                                     | Ben-Shalom<br>(2017) <sup>5</sup>                                                                     |
| 16 | G979R  | <b>SCN1A</b> ;<br>G979R;<br>D2 S6           | LoF;<br>WCC: None                                                                                                          | DS                                | Sugawara<br>(2003) <sup>184</sup><br>Rhodes<br>(2005) <sup>130</sup>        | <b>SCN8A</b> ;<br>G964R;<br>D2 S6        | LoF;<br>WCC: None                                                                                    | NDD without<br>EPI                                                      | Wagnon<br>(2017) <sup>185</sup>                                                                       |
| 17 | D1256N | <b>SCN4A</b> ;<br>D1069N<br>D3 S2           | LoF/Mixed;<br>WCC: Y, no change CD,<br>→V <sub>1/2</sub> Act., →V <sub>1/2</sub> FI                                        | Congenital<br>myopathy            | Zaharieva<br>(2016) <sup>14</sup>                                           | <b>SCN5A</b> ;<br>D1243N<br>D3 S2        | LoF/Mixed;<br>WCC: Y, no change CD,<br>→V <sub>1/2</sub> Act., →V <sub>1/2</sub> FI                  | BrS                                                                     | Glazer<br>(2020) <sup>1</sup>                                                                         |
| 18 | A1343T | <b>SCN4A</b> ;<br>A1156T<br>D3 S4-5         | GoF;<br>WCC: Y,<br>no change V <sub>1/2</sub> Act., →V <sub>1/2</sub> FI                                                   | PMC with<br>prominent<br>myalgia  | Palmio<br>(2017) <sup>236</sup>                                             | <b>SCN5A</b> ;<br>A1330T<br>D3 S4-5      | GoF;<br>WCC: Y,<br>no change V <sub>1/2</sub> Act., →V <sub>1/2</sub> FI                             | LQT3; SCD                                                               | Smits<br>(2005) <sup>238</sup>                                                                        |
| 19 | PI345L | <b>SCN3A</b> ;<br>PI333L<br>D3 S4-5         | GoF;<br>WCC: Y, ↑I <sub>NaP</sub> ,<br>←V <sub>1/2</sub> Act., no change V <sub>1/2</sub><br>FI                            | EPI                               | Zaman<br>(2018) <sup>155</sup>                                              | <b>SCN4A</b> ;<br>PI158L<br>D3 S4-5      | GoF;<br>WCC: Y,<br>no change V <sub>1/2</sub> Act., →V <sub>1/2</sub> FI                             | Sodium<br>channel<br>myotonia                                           | Desaphy<br>(2016) <sup>239</sup>                                                                      |
|    |        |                                             |                                                                                                                            |                                   |                                                                             | <b>SCN5A</b> ;<br>PI332L<br>D3 S4-5      | GoF/mixed;<br>WCC: Y, ←V <sub>1/2</sub> Act.,<br>←V <sub>1/2</sub> FI                                | LQT3, ECG:<br>TdP, LQT,<br>mexiletine<br>responder                      | Ruan<br>(2007) <sup>190</sup>                                                                         |
|    |        |                                             |                                                                                                                            |                                   |                                                                             | <b>SCN9A</b> ;<br>PI308L<br>D3 S4-5      | GoF;<br>WCC: Y, ↓CD,<br>←V <sub>1/2</sub> Act., no change V <sub>1/2</sub> FI                        | IEM                                                                     | Cheng<br>(2010) <sup>226</sup>                                                                        |
| 20 | SI346Y | <b>SCN2A</b> ;<br>SI336Y<br>D3 S4-5         | GoF/Mixed<br>(Na <sub>v</sub> 1.2N);<br>WCC: Y, ↓CD,<br>←V <sub>1/2</sub> Act., →V <sub>1/2</sub> FI                       | DEE                               | Thompson<br>(2020) <sup>54</sup>                                            | <b>SCN5A</b> ;<br>SI333Y<br>D3 S4-5      | GoF;<br>WCC: Y, no change CD,<br>←V <sub>1/2</sub> Act., →V <sub>1/2</sub> FI                        | SIDS; LQT3                                                              | Huang<br>(2009) <sup>243</sup>                                                                        |
| 21 | VI353A | <b>SCN9A</b> ;<br>VI316A<br>D3 S4-5         | GoF;<br>WCC: Y, ←V <sub>1/2</sub> Act.,<br>→V <sub>1/2</sub> FI                                                            | IEM                               | Wu (2013) <sup>252</sup> ,<br>Estacion<br>(2013) <sup>253</sup>             | <b>SCN11A</b> ;<br>VI184A<br>D3 S5       | GoF;<br>WCC: Y, ↑CD,<br>↑I <sub>NaP</sub> , ←V <sub>1/2</sub> Act., no<br>change V <sub>1/2</sub> FI | PPN, CAP                                                                | Leipold<br>(2015) <sup>255</sup>                                                                      |
| 22 | FI486C | <b>SCN4A</b> ;<br>FI298C<br>D3-D4<br>linker | GoF/Mixed;<br>WCC: Y,<br>→V <sub>1/2</sub> Act., →V <sub>1/2</sub> FI                                                      | Sodium<br>channel<br>myotonia     | Farinato<br>(2019) <sup>272</sup>                                           | <b>SCN5A</b> ;<br>FI473C<br>D3-D4 linker | GoF;<br>WCC: Y, ↑I <sub>NaP</sub> ,<br>no change V <sub>1/2</sub> Act., →V <sub>1/2</sub><br>FI      | LQT3; ECG:<br>TdP, LQT<br>with 2:1<br>block,<br>mexiletine<br>responder | Bankston<br>(2007) <sup>276</sup>                                                                     |

|    |        |                                             |                                                                                                                                              |                                                                                                                  |                                                                      |                                          |                                                                                                                        |                                                                                                        |                                                                                                            |
|----|--------|---------------------------------------------|----------------------------------------------------------------------------------------------------------------------------------------------|------------------------------------------------------------------------------------------------------------------|----------------------------------------------------------------------|------------------------------------------|------------------------------------------------------------------------------------------------------------------------|--------------------------------------------------------------------------------------------------------|------------------------------------------------------------------------------------------------------------|
| 23 | FI499L | <b>SCN1A</b> ;<br>FI499L<br>D3-D4<br>linker | GoF;<br>WCC: Y, ↑I <sub>NaP</sub> , no<br>change V <sub>1/2</sub> Act., →V <sub>1/2</sub> FI                                                 | FHM                                                                                                              | Barbieri<br>(2019) <sup>283</sup>                                    | <b>SCN5A</b> ;<br>FI486L<br>D3-D4 linker | GoF;<br>WCC: Y, ↑I <sub>NaP</sub> , no<br>change V <sub>1/2</sub> Act., →V <sub>1/2</sub> FI                           | LQT3                                                                                                   | Wang<br>(2007) <sup>36</sup>                                                                               |
| 24 | TI501I | <b>SCN3A</b> ;<br>TI486I<br>D3-D4<br>linker | GoF;<br>WCC: Y, ↑I <sub>NaP</sub> , no<br>change V <sub>1/2</sub> Act., →V <sub>1/2</sub> FI                                                 | EPI/PMG                                                                                                          | Zaman<br>(2020) <sup>147</sup>                                       | <b>SCN9A</b> ;<br>TI464I<br>D3-D4 linker | GoF;<br>WCC: Y, ↑I <sub>NaP</sub> ,<br>→V <sub>1/2</sub> Act., →V <sub>1/2</sub> FI                                    | PEPD,<br>responsive to<br>SCB                                                                          | Fertleman<br>(2006) <sup>227</sup><br>Theile<br>(2011) <sup>159</sup>                                      |
| 25 | EI587K | <b>SCN1A</b> ;<br>EI587K<br>D4 S2           | LoF;<br>WCC: None                                                                                                                            | EPI                                                                                                              | Kluckova<br>(2020) <sup>10</sup>                                     | <b>SCN5A</b> ;<br>EI574K<br>D4 S2        | LoF;<br>WCC: Y, ↓↓CD,<br>→V <sub>1/2</sub> Act.                                                                        | BrS                                                                                                    | Glazer<br>(2020) <sup>1</sup>                                                                              |
| 26 | RI596C | <b>SCN1A</b> ;<br>RI596C<br>D4 S2-3         | LoF;<br>WCC: None                                                                                                                            | EPI                                                                                                              | Kluckova<br>(2020) <sup>10</sup>                                     | <b>SCN5A</b> ;<br>RI583C<br>D4 S2-3      | LoF;<br>WCC: Y, ↓CD, no<br>change I <sub>NaP</sub> , no change V <sub>1/2</sub><br>Act., no change V <sub>1/2</sub> FI | BrS                                                                                                    | Glazer<br>(2020) <sup>1</sup>                                                                              |
| 27 | PI632S | <b>SCN1A</b> ;<br>PI632S;<br>D4 S3-4        | LoF;<br>WCC: Y, ←V <sub>1/2</sub> Act.,<br>←V <sub>1/2</sub> FI                                                                              | DS                                                                                                               | Rhodes<br>(2005) <sup>130</sup>                                      | <b>SCN2A</b> ;<br>PI622S;<br>D4 S3-4     | LoF;<br>WCC: Y, ←V <sub>1/2</sub> FI                                                                                   | ASD and Sz<br>onset 21<br>months                                                                       | Wolff<br>(2017) <sup>96</sup>                                                                              |
| 28 | RI636Q | <b>SCN3A</b> ;<br>RI621Q<br>D4 S4           | GoF;<br>WCC: Y, no change CD,<br>↑I <sub>NaP</sub> , ←V <sub>1/2</sub> Act., no<br>change V <sub>1/2</sub> FI                                | EPI/PMG                                                                                                          | Zaman<br>(2020) <sup>147</sup>                                       | <b>SCN8A</b> ;<br>RI617Q<br>D4 S4        | GoF;<br>WCC: Y, ↑I <sub>NaP</sub> ,<br>←V <sub>1/2</sub> Act., →V <sub>1/2</sub> FI                                    | DEE, Sz onset<br>3 months                                                                              | Wagnon<br>(2015) <sup>314</sup>                                                                            |
|    |        |                                             |                                                                                                                                              |                                                                                                                  |                                                                      | <b>SCN5A</b> ;<br>RI623Q<br>D4 S4        | GoF;<br>WCC: Y, ↑I <sub>NaP</sub> ,<br>←V <sub>1/2</sub> Act.                                                          | LQT3; ECG:<br>TdP, LQT,<br>mexiletine<br>responder                                                     | Kambouris<br>(1998) <sup>310</sup><br>Tsurugi<br>(2009) <sup>311</sup>                                     |
| 29 | RI639L | <b>SCN4A</b> ;<br>RI451L<br>D4 S4           | LoF;<br>WCC: Y, ↓CD,<br>no change V <sub>1/2</sub> Act., ←V <sub>1/2</sub> FI                                                                | Complex<br>phenotype<br>including<br>myotonia and<br>paralysis<br>(both<br>potassium<br>sensitive and<br>hypopp) | Poulin<br>(2018) <sup>318</sup>                                      | <b>SCN8A</b> ;<br>RI620L<br>D4 S4        | LoF;<br>WCC: Y, ↓↓CD,<br>no change V <sub>1/2</sub> Act., ←V <sub>1/2</sub> FI                                         | ASD                                                                                                    | Liu (2019) <sup>288</sup>                                                                                  |
| 30 | RI645H | <b>SCN4A</b> ;<br>RI457H<br>D4 S4           | LoF;<br>WCC: Y, no change V <sub>1/2</sub><br>Act., ←V <sub>1/2</sub> FI                                                                     | CMS (in<br>patient<br>homozygous<br>for RI457H<br>variant)                                                       | Arnold<br>(2015) <sup>326</sup>                                      | <b>SCN5A</b> ;<br>RI632H<br>D4 S4        | LoF;<br>WCC: Y, no change CD,<br>no change V <sub>1/2</sub> Act., ←V <sub>1/2</sub> FI                                 | SSS; ECG:<br>bradycardia,<br>absent atrial<br>depolarizatio<br>ns, prolonged<br>QRS, 1° heart<br>block | Benson<br>(2003) <sup>327</sup>                                                                            |
| 31 | RI657C | <b>SCN1A</b> ;<br>RI657C;<br>D4 S4-5        | LoF;<br>WCC: Y, ↓CD,<br>→V <sub>1/2</sub> Act., no change V <sub>1/2</sub> FI                                                                | GEFS+                                                                                                            | Lossin<br>(2003) <sup>186</sup>                                      | <b>SCN5A</b> ;<br>RI644C<br>D4 S4-5      | LoF;<br>WCC: Y, →V <sub>1/2</sub> Act.,<br>no change V <sub>1/2</sub> FI                                               | BrS; ECG: ST<br>elevation,<br>echo: CM<br>changes                                                      | Frustaci<br>(2005) <sup>87</sup>                                                                           |
|    |        |                                             |                                                                                                                                              |                                                                                                                  |                                                                      | <b>SCN8A</b> ;<br>RI638C;<br>D4 S4-5     | LoF;<br>WCC: Y, →V <sub>1/2</sub> Act.,<br>no change V <sub>1/2</sub> FI                                               | NDD without<br>epilepsy                                                                                | Wengert<br>(2019) <sup>65</sup>                                                                            |
| 32 | FI661S | <b>SCN1A</b> ;<br>FI661S<br>D4 S4-5         | Mixed;<br>50% reduction in<br>trafficking<br>WCC: Y, ↓CD,<br>↑I <sub>NaP</sub> ,<br>no change V <sub>1/2</sub> Act.,<br>→V <sub>1/2</sub> FI | DS                                                                                                               | Rhodes<br>(2004) <sup>172</sup><br>Thompson<br>(2012) <sup>187</sup> | <b>SCN4A</b> ;<br>FI473S<br>D4 S4-5      | GoF;<br>WCC: Y, CD not<br>reported, ↑I <sub>NaP</sub> ,<br>no change V <sub>1/2</sub> Act., →V <sub>1/2</sub> FI       | PMC                                                                                                    | Fleischhauer<br>(1998) <sup>336</sup>                                                                      |
| 33 | MI664K | <b>SCN1A</b> ;<br>MI664K<br>D4 S4-5         | LoF;<br>90% reduction in<br>peak current and<br>trafficking not<br>allowing for detailed<br><b>SCN1A</b> biophysics                          | GEFS+/DS                                                                                                         | Bechi<br>(2015) <sup>124</sup>                                       | <b>SCN9A</b> ;<br>MI627K<br>D4 S4-5      | GoF;<br>WCC: Y,<br>no change CD,<br>no change V <sub>1/2</sub> Act., →V <sub>1/2</sub> FI                              | PEPD                                                                                                   | Fertleman<br>(2006) <sup>227</sup><br>Dib-Hajj<br>(2008) <sup>338</sup><br>Theile<br>(2011) <sup>159</sup> |

|    |        |                                     |                                                                                                       |                                                                         |                                                                                                     |                                     |                                                                                                             |                                             |                                                                                                       |
|----|--------|-------------------------------------|-------------------------------------------------------------------------------------------------------|-------------------------------------------------------------------------|-----------------------------------------------------------------------------------------------------|-------------------------------------|-------------------------------------------------------------------------------------------------------------|---------------------------------------------|-------------------------------------------------------------------------------------------------------|
| 34 | G1674R | <b>SCN1A</b> ;<br>G1674R<br>D4 S5   | LoF;<br>WCC: None<br>↓↓CD                                                                             | EPI                                                                     | Rhodes<br>(2004) <sup>172</sup><br>Thompson<br>(2012) <sup>187</sup>                                | <b>SCN5A</b> ;<br>G1661R<br>D4 S5   | LoF;<br>WCC: Y (barely)<br>↓↓CD                                                                             | BrS                                         | Glazer<br>(2020) <sup>1</sup>                                                                         |
| 35 | M1780I | <b>SCN3A</b> ;<br>M1765I<br>D4 S6   | GoF;<br>WCC: Y, ↑I <sub>NaP</sub> ,<br>←V <sub>1/2 Act.</sub> , no change V <sub>1/2 FI</sub>         | EPI/PMG                                                                 | Zaman<br>(2020) <sup>147</sup>                                                                      | <b>SCN8A</b> ;<br>M1760I<br>D4 S6   | GoF;<br>WCC: Y, ←V <sub>1/2 Act.</sub> ,<br>no change V <sub>1/2 FI</sub>                                   | EPI                                         | Liu (2019) <sup>288</sup>                                                                             |
| 36 | N1788D | <b>SCN5A</b> ;<br>N1774D<br>C-Term  | GoF;<br>WCC: Y, ↑CD,<br>↑I <sub>NaP</sub> , ←V <sub>1/2 Act.</sub> , no<br>change V <sub>1/2 FI</sub> | LQT3; ECG:<br>TdP, LQT<br>with 2:1<br>block,<br>mexiletine<br>responder | Kato (2014) <sup>94</sup>                                                                           | <b>SCN8A</b> ;<br>N1768D<br>C-Term  | GoF;<br>WCC: Y, ↑I <sub>NaP</sub> ,<br>no change V <sub>1/2 Act.</sub> , →V <sub>1/2 FI</sub>               | DEE, Sz onset<br>6 months                   | Veeramah<br>(2012) <sup>366</sup><br>Patel<br>(2016) <sup>247</sup><br>Baker<br>(2018) <sup>367</sup> |
| 37 | R1892Q | <b>SCN2A</b> ;<br>R1882Q;<br>C-Term | GoF;<br>WCC: Y, ↑CD,<br>↑I <sub>NaP</sub> , ←V <sub>1/2 Act.</sub> , →V <sub>1/2<br/>FI</sub>         | DEE, Sz onset<br>1 day                                                  | Berecki<br>(2018) <sup>141</sup><br>Mason<br>(2019) <sup>142</sup><br>Wolff<br>(2017) <sup>96</sup> | <b>SCN8A</b> ;<br>R1872Q;<br>C-Term | GoF;<br>WCC: Y, ↑CD,<br>←V <sub>1/2 Act.</sub> , →V <sub>1/2 FI</sub>                                       | DEE, Sz onset<br>4 months                   | Wagnon<br>(2015) <sup>314</sup><br>Aktin<br>(2018) <sup>393</sup>                                     |
| 38 | Q1923R | <b>SCN1A</b> ;<br>Q1923R<br>C-Term  | LoF;<br>WCC: None                                                                                     | DS                                                                      | Nissenkorn<br>(2019) <sup>29</sup>                                                                  | <b>SCN5A</b> ;<br>Q1909R<br>C-Term  | Mixed;<br>←V <sub>1/2 Act.</sub> , no change V <sub>1/2<br/>FI</sub><br>decrease in peak<br>current by 50%. | SIDS (not a<br>known<br>cardiac<br>patient) | Winkel<br>(2015) <sup>103</sup><br>Abdelsayed<br>(2017) <sup>369</sup>                                |

Corresponding variant = identical variant among different SCN at the same position/location in the SCN protein (the corresponding sequence numbers are not identical as the amino acid sequence between SCN variants differs slightly).

Rows marked in grey denote variant pairs with divergent functional properties.

\*References relate to those detailed in Supplementary Table 1.

**Phenotypical features:** ASD = autism spectrum disorder, BrS = Brugada syndrome, CAP = cold aggravated pain, CM changes = cardiomyopathic changes, CMS = congenital myasthenic syndrome, DEE = developmental and epileptic encephalopathy, DS = Dravet syndrome, ECG = electrocardiogram, echo = echocardiogram, EPI = epilepsy, FHM3 = familial hemiplegic migraine type 3, GEFS+ = genetic epilepsy with febrile seizures plus, Hyper-PP = hyperkalaemic periodic paralysis, Hypo-PP = hypokalaemic periodic paralysis, IEM = inherited erythromelalgia, LQT3 = long QT3 syndrome, Na<sub>v</sub>1.2N = neonatal proteoform, NDD = neurodevelopmental disorder, PAM = potassium-aggravated myotonia, PDN = painful diabetic neuropathy, PEPD = paroxysmal extreme pain disorder, PMC = paramyotonia congenita, PMG = polymicrogyria, PPN = painful peripheral neuropathy, SCB = sodium channel blocker, SCD = sudden cardiac death, SIDS = sudden infant death syndrome, SSS = sick sinus syndrome, SUD = sudden unexplained death, Sz = seizure, TdP = torsade de pointes, VT = ventricular tachycardia

**Electrophysiological key features:** Arrows (→) are used for electrophysiological parameters. The direction of the arrows indicates hyperpolarizing (←) or depolarizing shifts (→), as well as an increase (↑) or decrease (↓) of parameters, (↓↓ = >50% decrease)

**Electrophysiological abbreviations:** GoF: gain-of-function, LoF: loss-of-function, WCC: whole cell current (Y = measurable, N = not measurable), Act: activation, CD: current density, FI: fast inactivation, SI: slow inactivation, I<sub>NaP</sub>: persistent sodium current, V<sub>1/2 Act.</sub>: half-activation of steady-state activation curve, V<sub>1/2 FI</sub>: half-inactivation of steady-state fast inactivation curve.

## Supplementary Table 3: Detailed *SCN1-11A* Analysis

| <b>SCN1A</b>          |            |                                                                                                                              |                                                                                                                                                                                                                                                                                                                                                                                  |                                                                                                                              |       |
|-----------------------|------------|------------------------------------------------------------------------------------------------------------------------------|----------------------------------------------------------------------------------------------------------------------------------------------------------------------------------------------------------------------------------------------------------------------------------------------------------------------------------------------------------------------------------|------------------------------------------------------------------------------------------------------------------------------|-------|
| <b>Disorder</b>       | <b>No.</b> | <b>Functional Effects</b>                                                                                                    | <b>Distribution</b>                                                                                                                                                                                                                                                                                                                                                              | <b>Clinical Context</b>                                                                                                      |       |
| <b>EPI</b>            | 60 (85%)   | <ul style="list-style-type: none"> <li>GoF – (3/60, 5%)</li> <li>LoF – (47/60, 78%)</li> <li>Mixed – (10/60, 17%)</li> </ul> | <i>SCN1A</i> variants clustered across pore-loop regions (S5, S5-6 & S6) and 88% of variants showed LoF (23/26)                                                                                                                                                                                                                                                                  | Variants displaying LoF were more frequently associated with DS, whereas variants showing GoF were FHM3-associated (p<0.001) |       |
| <b>FHM3</b>           | 11 (15%)   | <ul style="list-style-type: none"> <li>GoF – (8/11, 73%)</li> <li>LoF – (1/11, 9%)</li> <li>Mixed – (2/11, 18%)</li> </ul>   | 55% (6/11) of FHM3-associated variants occurred in sites implicated in channel inactivation, including the DIII-IV linker, DIVS4-5 and DIVS6, predominantly showing GoF effects. Of these, 83% were GoF (5/6). While most FHM3-associated variants are associated with GoF effects, the variant located in DIVS4 was clearly mixed. The other mixed variant was located in DIVS5 |                                                                                                                              |       |
| <b>SCN2A</b>          |            |                                                                                                                              |                                                                                                                                                                                                                                                                                                                                                                                  |                                                                                                                              |       |
| <b>Disorder</b>       | <b>No.</b> | <b>Functional Effect</b>                                                                                                     | <b>Distribution</b>                                                                                                                                                                                                                                                                                                                                                              | <b>Clinical Context</b>                                                                                                      |       |
| <b>EPI</b>            | 29 (81%)   | <ul style="list-style-type: none"> <li>GoF – (17/29, 59%)</li> <li>LoF – (7/29, 24%)</li> <li>Mixed – (5/29, 17%)</li> </ul> | <i>SCN2A</i> epilepsy-associated variants were evenly distributed across homologous domains but very few were found in pore-forming regions                                                                                                                                                                                                                                      | Variants displaying LoF effects were frequently associated with ASD, while GoF variants were epilepsy-associated (p = 0.001) |       |
| <b>ASD</b>            | 7 (19%)    | All variants showed LoF                                                                                                      | 71% of ASD-associated variants clustered in pore-loop regions (5/7), all displaying LoF                                                                                                                                                                                                                                                                                          |                                                                                                                              |       |
| <b>SCN3A</b>          |            |                                                                                                                              |                                                                                                                                                                                                                                                                                                                                                                                  |                                                                                                                              |       |
| <b>Disorder</b>       | <b>No.</b> | <b>Functional Effect</b>                                                                                                     | <b>Distribution</b>                                                                                                                                                                                                                                                                                                                                                              | <b>Clinical Context</b>                                                                                                      |       |
| <b>EPI</b>            | 5 (38%)    | <ul style="list-style-type: none"> <li>GoF – 3/5 (60%)</li> <li>LoF – 1/5 (20%)</li> <li>Mixed – 1/5 (20%)</li> </ul>        | Variants associated with an epilepsy or mixed phenotype were evenly distributed across the protein and only two were observed in pore-forming regions                                                                                                                                                                                                                            | Epilepsy and PMG variants appear to be mainly GoF                                                                            |       |
| <b>EPI/PMG</b>        | 6 (46%)    | All variants showed GoF                                                                                                      |                                                                                                                                                                                                                                                                                                                                                                                  |                                                                                                                              |       |
| <b>ASD</b>            | 1 (8%)     | LoF                                                                                                                          |                                                                                                                                                                                                                                                                                                                                                                                  |                                                                                                                              | DIVS5 |
| <b>Fetal Akinesia</b> | 1 (8%)     | GoF                                                                                                                          |                                                                                                                                                                                                                                                                                                                                                                                  |                                                                                                                              | DIIS4 |

| SCN4A                  |           |                                                                                                                             |                                                                                                                                                          |                                                                                                                                                                                                                                                                                                                                                                                    |
|------------------------|-----------|-----------------------------------------------------------------------------------------------------------------------------|----------------------------------------------------------------------------------------------------------------------------------------------------------|------------------------------------------------------------------------------------------------------------------------------------------------------------------------------------------------------------------------------------------------------------------------------------------------------------------------------------------------------------------------------------|
| Disorder               | No.       | Functional Effect                                                                                                           | Distribution                                                                                                                                             | Clinical Context                                                                                                                                                                                                                                                                                                                                                                   |
| <b>PMC</b>             | 14 (36%)  | <ul style="list-style-type: none"> <li>GoF – (11/14, 86%)</li> <li>LoF – (1/14, 7%)</li> <li>Mixed – (2/14, 7%)</li> </ul>  | 43% occurred in the DIII-IV linker (6/14) and the remainder across the protein                                                                           | <p>GoF variants were frequently PAM/PMC-associated, whereas LoF variants were CMS-associated (p&lt;0.001). Overall, 32% of variants occurred in inactivation sites (12/38), 92% of which showed GoF (11/12). 29% of variants were found in S4 sites (11/38), 70% of which showed LoF (8/11). 18% occurred in pore-forming regions (7/38) and the remainder across the protein.</p> |
| <b>CMS</b>             | 10 (26%)  | <ul style="list-style-type: none"> <li>LoF – (8/10, 80%)</li> <li>Mixed – (2/10, 20%)</li> </ul>                            | Two variants occurred in pore-loops and two in voltage-sensing regions.                                                                                  |                                                                                                                                                                                                                                                                                                                                                                                    |
| <b>PAM</b>             | 4 (11%)   | All variants showed GoF                                                                                                     | Three variants were found in inactivation sites and one in the C-terminus                                                                                |                                                                                                                                                                                                                                                                                                                                                                                    |
| <b>HypoPP</b>          | 5 (13%)   | Four variants displayed LoF and one variant showed mixed function                                                           | All four variants displaying LoF were found in S4 sites while the LoF variant was found in DIIIS4-5                                                      |                                                                                                                                                                                                                                                                                                                                                                                    |
| <b>HyperPP</b>         | 1 (3%)    | Mixed                                                                                                                       | DIVS5                                                                                                                                                    |                                                                                                                                                                                                                                                                                                                                                                                    |
| <b>NormoPP</b>         | 1 (3%)    | Mixed                                                                                                                       | DIIS4                                                                                                                                                    |                                                                                                                                                                                                                                                                                                                                                                                    |
| <b>Mixed Phenotype</b> | 3 (8%)    | All variants showed GoF                                                                                                     | Variants occurred in DIS6, DIIS5 and DIIIS4-5                                                                                                            |                                                                                                                                                                                                                                                                                                                                                                                    |
| SCN5A                  |           |                                                                                                                             |                                                                                                                                                          |                                                                                                                                                                                                                                                                                                                                                                                    |
| Disorder               | No.       | Functional Effect                                                                                                           | Distribution                                                                                                                                             | Clinical Context                                                                                                                                                                                                                                                                                                                                                                   |
| <b>BrS</b>             | 100 (69%) | 96% of variants showed LoF (96/100), three were mixed effect and one displayed GoF                                          | 52% of BrS-associated variants occurred in pore-loop regions (S5, S5-6 & S6) (52/100), while only 6% were found at sites of channel inactivation (6/100) | <p>Variants displaying LoF effects were more frequently BrS-associated, while GoF variants were LQT3-associated, (p&lt;0.001)</p>                                                                                                                                                                                                                                                  |
| <b>LQT3</b>            | 38 (26%)  | <ul style="list-style-type: none"> <li>GoF – (30/38, 79%)</li> <li>LoF – (2/38, 5%)</li> <li>Mixed – (6/38, 16%)</li> </ul> | 47% of LQT3 variants clustered in sites of inactivation (18/38), showing predominantly GoF (94%, 17/18)                                                  |                                                                                                                                                                                                                                                                                                                                                                                    |
| <b>Mixed</b>           | 8 (5%)    | <ul style="list-style-type: none"> <li>LoF – 4/8 (50%)</li> <li>Mixed – 4/8 (50%)</li> </ul>                                | Two variants occurred in the C-terminus, one in DIS4, one in DIIS4 and the rest across the protein                                                       |                                                                                                                                                                                                                                                                                                                                                                                    |



| <b>SCN8A</b>    |            |                                                                                                 |                                                                                                                                                                                                      |                                                                                                                             |
|-----------------|------------|-------------------------------------------------------------------------------------------------|------------------------------------------------------------------------------------------------------------------------------------------------------------------------------------------------------|-----------------------------------------------------------------------------------------------------------------------------|
| <b>Disorder</b> | <b>No.</b> | <b>Functional Effect</b>                                                                        | <b>Distribution</b>                                                                                                                                                                                  | <b>Clinical Context</b>                                                                                                     |
| <b>EPI</b>      | 14 (67%)   | <ul style="list-style-type: none"> <li>GoF – (12/14, 86%)</li> <li>LoF – (2/14, 14%)</li> </ul> | 29% occurred in S4 regions (4/14), 14% in the C-terminus (2/14), 14% in inactivation sites (2/14) and the remainder across the protein. None occurred in cytoplasmic regions.                        | Variants displaying LoF effects were frequently NDD/ASD-associated, while GoF variants were epilepsy-associated, (p=0.003). |
| <b>NDD</b>      | 5 (23%)    | All variants showed LoF                                                                         | Three were found in pore-forming regions, one in DIVS4-5 and one in DIIS3                                                                                                                            |                                                                                                                             |
| <b>ASD</b>      | 2 (9%)     | One variant showed GoF while the other LoF                                                      | Both variants were located in DIVS4                                                                                                                                                                  |                                                                                                                             |
| <b>SCN9A</b>    |            |                                                                                                 |                                                                                                                                                                                                      |                                                                                                                             |
| <b>Disorder</b> | <b>No.</b> | <b>Functional Effect</b>                                                                        | <b>Distribution</b>                                                                                                                                                                                  | <b>Clinical Context</b>                                                                                                     |
| <b>PPN</b>      | 34         | <ul style="list-style-type: none"> <li>GoF – 33/34 (97%)</li> <li>Mixed – 1/34 (3%)</li> </ul>  | Of 33 GoF variants, 33% were found in inactivation sites (11/33), 18% in DIIS5 (6/33), 15% in S4 regions (5/33) and the remainder across the protein. The mixed effect variant was located in DIIS4. | The majority of variants appear to be GoF                                                                                   |
| <b>SCN10A</b>   |            |                                                                                                 |                                                                                                                                                                                                      |                                                                                                                             |
| <b>Disorder</b> | <b>No.</b> | <b>Functional Effect</b>                                                                        | <b>Distribution</b>                                                                                                                                                                                  | <b>Clinical Context</b>                                                                                                     |
| <b>AF</b>       | 1          | LoF                                                                                             | The LoF variant was observed in the N-terminus                                                                                                                                                       | GoF variants appear to be associated with PPN                                                                               |
| <b>SUD</b>      | 2          | Both variants showed LoF                                                                        | Variants were observed in DIS6 and DIIS4                                                                                                                                                             |                                                                                                                             |
| <b>PPN</b>      | 3          | All variants showed GoF                                                                         | Variants were found at DIS4-S5, DIVS5-6 and DIVS6                                                                                                                                                    |                                                                                                                             |
| <b>SCN11A</b>   |            |                                                                                                 |                                                                                                                                                                                                      |                                                                                                                             |
| <b>Disorder</b> | <b>No.</b> | <b>Functional Effect</b>                                                                        | <b>Distribution</b>                                                                                                                                                                                  | <b>Clinical Context</b>                                                                                                     |
| <b>PPN</b>      | 4          | All variants showed GoF                                                                         | PPN-associated variants were found in DIS4, DIIS4-5, DIIS4 and DIIS5                                                                                                                                 | The majority of variants appear to be GoF.                                                                                  |

**Phenotypical features:** FHM3 = familial hemiplegic migraine type 3, EPI = epilepsy, ASD = autism spectrum disorder, NDD = neurodevelopmental disorder, PMG = polymicrogyria, Hypo-PP = hypokalaemic periodic paralysis, Hyper-PP = hyperkalaemic periodic paralysis, PMC = paramyotonia congenita, CMS = congenital myasthenic syndrome, PAM = potassium-aggravated myotonia, BrS = Brugada syndrome, LQT3 = long QT3 syndrome, SCD = sudden cardiac death, PPN = peripheral painful neuropathy (including, PEPD = paroxysmal extreme pain disorder, IEM = inherited erythromelalgia and SFN = small fibre neuropathy), AF = atrial fibrillation, SUD = sudden unexpected death.

## Supplementary Figure 1: Study Selection

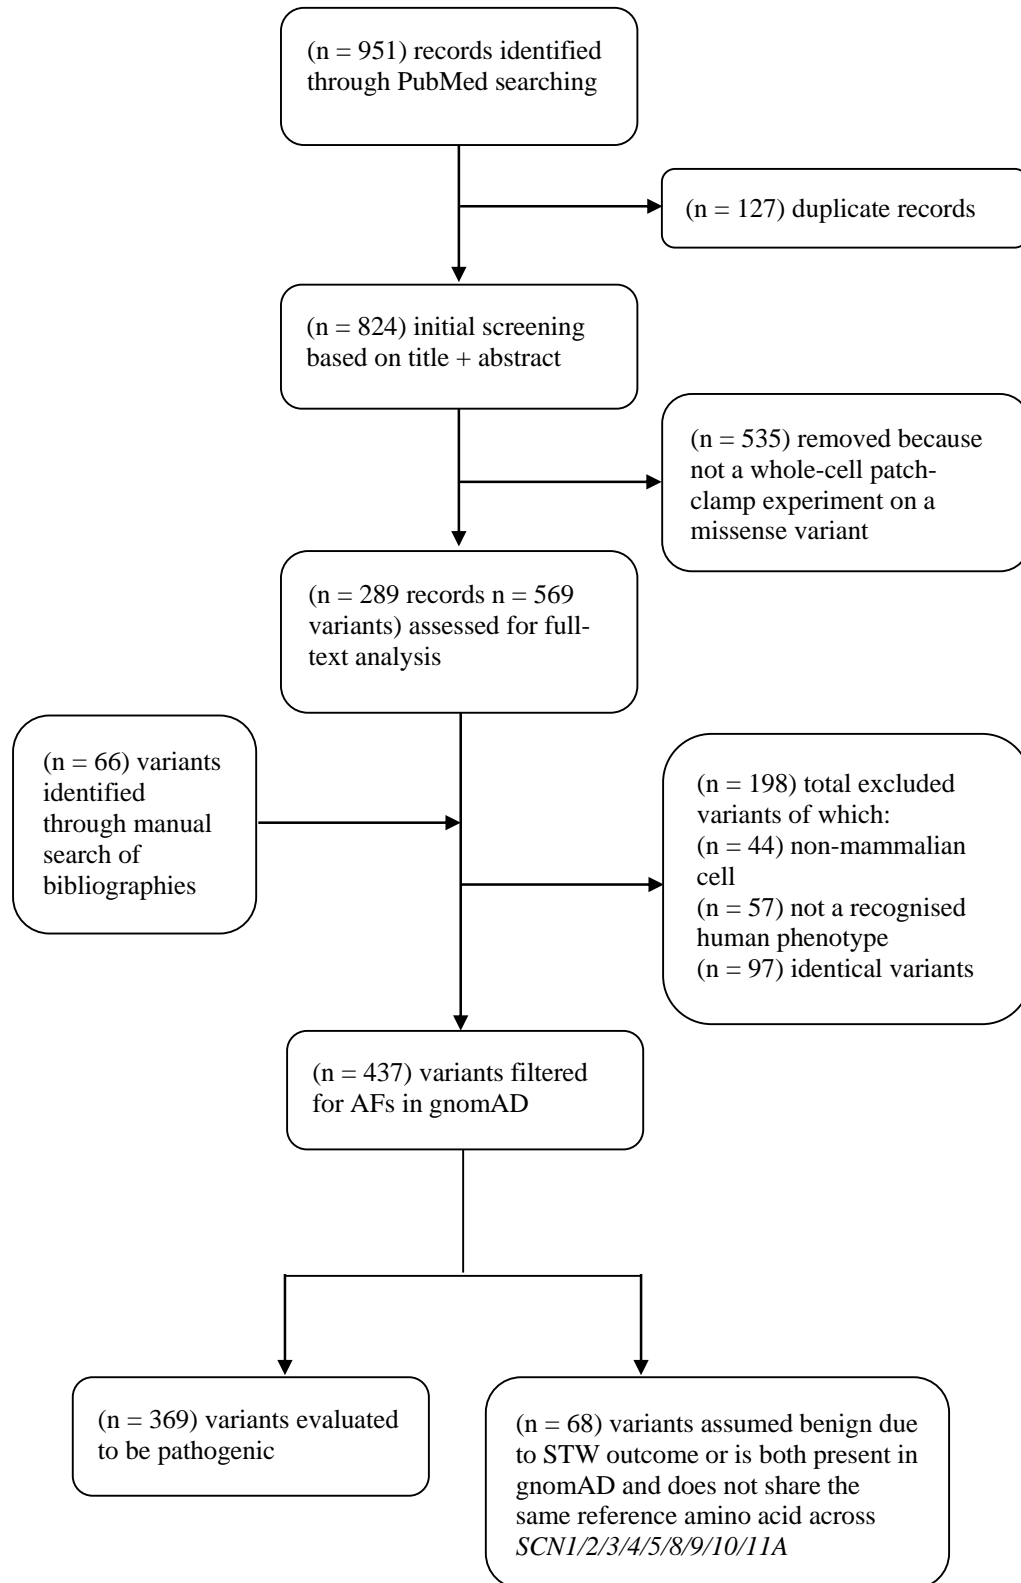

## Supplementary Figure 2: Voltage sensing regions (S4) structure zoom across D1-D4

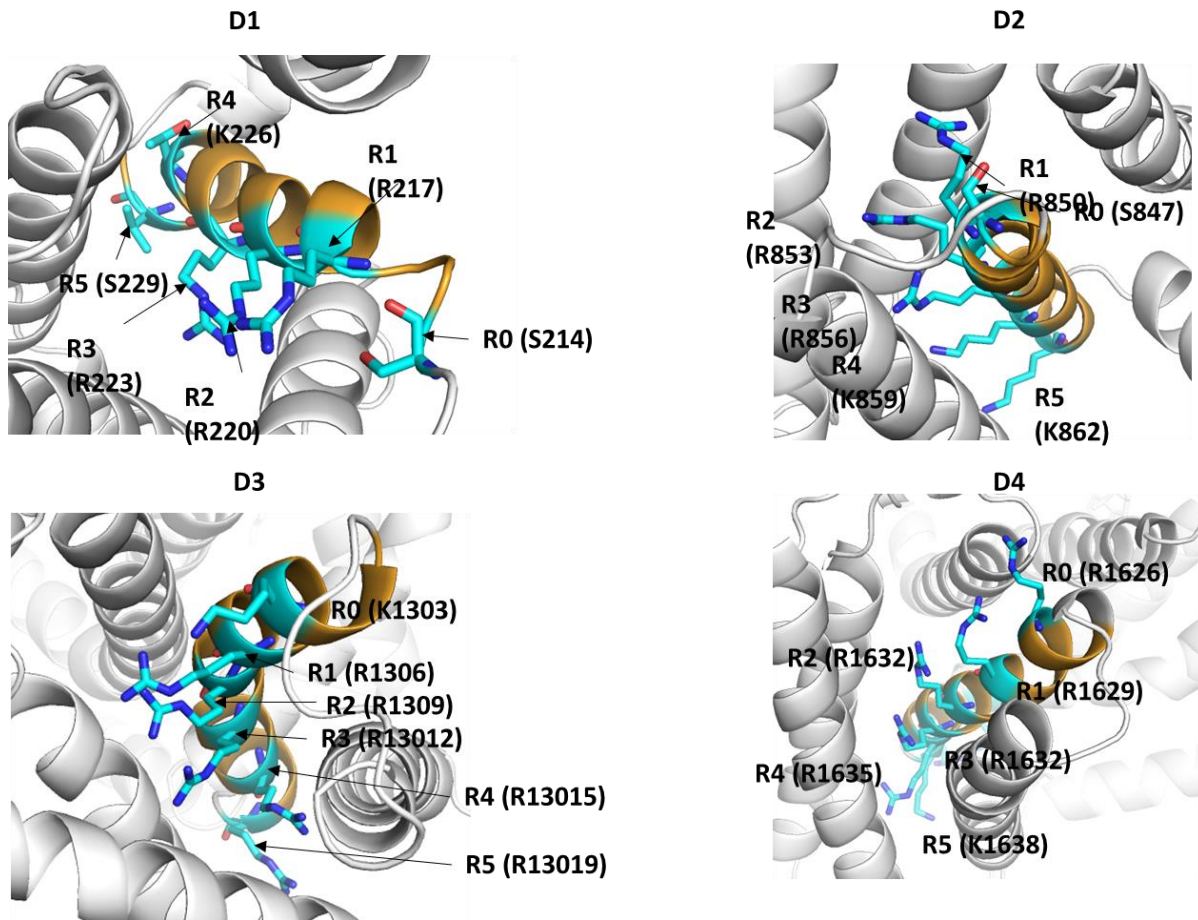

**Voltage sensing regions (S4) structure zoom across D1-D4.** Close-up view of S4 voltage sensing regions across all four domains (D1-D4) illustrating conserved Arginines R0-R4.
